# Supplementary material for: Two small-molecule inhibitors of Toxoplasma gondii proliferation in vitro
Source: Front Cell Infect Microbiol. 2023 Apr 3;13:1145824. doi: 10.3389/fcimb.2023.1145824 (PMC10106592; doi:10.3389/fcimb.2023.1145824)
Supplement: Supplementary Table 1 — The 152 compounds’ parasite inhibition (%) and host viability (%). [file Table_1.xlsx]

## Sheet: Sheet1
		Parasite inhibition (%)		Host viability (%)
Compound #	Compound Name	mean	SD	mean	SD
1	Carbamazepine	-15.9041	0.02	/	/
2	Clonidine HCl	-6.27306	0.08	/	/
3	Tamoxifen Citrate (Nolvadex)	51.845	0.09	/	/
4	Paclitaxel (Taxol)	51.0701	0.04	/	/
5	GNE0877	-12.1402	0.15	/	/
6	Obatoclax mesylate (GX15-070)	69.2251	0.001	49.95	0.05
7	Carbamazepine (Carbatrol)	-8.37638	0.12	/	/
8	Aloxistatin	36.3469	0.17	/	/
9	Balicatib	46.31	0.03	/	/
10	Vincristine	63.1365	0.02	/	/
11	MSX122	25.0554	0.05	/	/
12	Vorinostat (SAHA)	67.1218	0.01	83.13	0.08
13	Indole-3-Glyoxylyl Chloride	25.4982	0.01	/	/
14	Siramesine hydrochloride	67.0111	0.01	/	/
15	Ibiglustat	13.8745	0.1	/	/
16	Omeprazole (Prilosec)	56.7159	0.05	/	/
17	Omeprazole	51.2915	0.09	/	/
18	2-Aminoethanethiol	-44.3542	0.54	/	/
19	MKT077	61.3653	0.03	46.33	0.05
20	CZC25146	40.2214	0.02	/	/
21	Sulfacetamide Sodium	21.7343	0.01	/	/
22	Erlotinib HCl (OSI-744)	57.048	0.03	/	/
23	Y-27632 2HCl	5.01845	0.19	/	/
24	CZC54252	71.4391	0	/	/
25	SR9011	68.1181	0	89.05	0.05
26	Metformin HCl (Glucophage)	19.2989	0.03	/	/
27	Lys05	64.2435	0.01	/	/
28	Azithromycin (Zithromax)	-15.6827	0.05	/	/
29	Nimodipine (Nimotop)	-0.0738007	0.09	/	/
30	PF06447475	12.6568	0.1	/	/
31	Lu-28-179	64.4649	0.01	61.12	0.08
32	Amiodarone HCl	60.2583	0	104.82	0.23
33	SBI0206965	62.6937	0	94.52	0.11
34	Tetrahydro Curcumin	62.4723	0.02	91.68	0.13
35	Loperamide HCl	60.8118	0.01	102.96	0.03
36	Glucosamine (hydrochloride)	10.8856	0.19	/	/
37	Mefloquine (hydrochloride)	65.7934	0.06	/	/
38	Prazosin (hydrochloride)	15.0923	0	/	/
39	Saquinavir (Mesylate)	5.68266	0.07	/	/
40	Novobiocin (Sodium)	2.25092	0.04	/	/
41	Atropine (sulfate monohydrate)	2.25092	0.02	/	/
42	Trimetazidine (dihydrochloride)	11.9926	0.05	/	/
43	Enalaprilat (dihydrate)	20.2952	0.04	/	/
44	RG3039	28.0443	0.01	/	/
45	Pyriproxyfen	33.1365	0.03	/	/
46	Rasagiline (mesylate)	21.1808	0.02	/	/
47	Ranolazine (dihydrochloride)	37.5646	0.04	/	/
48	Enzalutamide	12.5461	0	/	/
49	Fludrocortisone (acetate)	48.0812	0.04	/	/
50	Pitavastatin (Calcium)	49.9631	0.02	/	/
51	Bromhexine (hydrochloride)	32.3616	0.02	/	/
52	Nortriptyline (hydrochloride)	41.2177	0.01	/	/
53	Megestrol (Acetate)	-25.9779	0.09	/	/
54	HG-10-102-01	46.1993	0.04	/	/
55	Doxazosin (mesylate)	22.8413	0	/	/
56	Thioridazine (hydrochloride)	27.3801	0.01	/	/
57	Amiodarone (hydrochloride)	-30.9594	0.08	/	/
58	Aliskiren (hemifumarate)	-36.3838	0.11	/	/
59	Maprotiline (hydrochloride)	55.7196	0.02	/	/
60	Pifithrin-α	-16.0148	0.03	/	/
61	Triflupromazine (hydrochloride)	23.2841	0.07	/	/
62	Ixazomib	12.5461	0.03	/	/
63	Rupatadine (Fumarate)	-73.4686	0.35	/	/
64	Kanamycin (sulfate)	-50	0.03	/	/
65	Oleanolic Acid	-61.5129	0.01	/	/
66	Bicyclol	-10.369	0.05	/	/
67	Emetine (dihydrochloride hydrate)	67.3432	0	/	/
68	Pantoprazole (sodium)	-7.26937	0.1	/	/
69	AZD-3463	70.8856	0	/	/
70	Propranolol (hydrochloride)	-56.1993	0.55	/	/
71	AS1842856	60.5904	0.01	58.71	0.05
72	Tamoxifen (Citrate)	21.6236	0.01	/	/
73	Fluoxetine (hydrochloride)	61.476	0.01	92.88	0.12
74	MLi-2	41.2177	0.01	/	/
75	NS1643	-74.2435	0.12	/	/
76	FK866	-40.2583	0.23	/	/
77	Lys01 (trihydrochloride)	7.67528	0.06	/	/
78	CX546	-21.6605	0.06	/	/
79	LRRK2-IN-1	66.1255	0.04	111.17	0.21
80	Levobupivacaine (hydrochloride)	-38.155	0.08	/	/
81	Nicardipine (Hydrochloride)	-55.8672	0.08	/	/
82	Aliskiren	-29.8524	0	/	/
83	Fluvastatin (sodium)	24.5018	0.03	/	/
84	Vandetanib	60.2583	0	/	/
85	Colistin (sulfate)	-37.2694	0.07	/	/
86	AX20017	-29.1882	0.07	/	/
87	GSK4112	-49.0037	0.17	/	/
88	Raloxifene (hydrochloride)	-47.4539	0.05	/	/
89	Salbutamol (hemisulfate)	-74.2435	0.07	/	/
90	FIPI	-37.9336	0.25	/	/
91	Nordihydroguaiaretic acid	-46.3469	0.17	/	/
92	Nitroprusside (disodium dihydrate)	-86.8635	0.06	/	/
93	Rosuvastatin (Calcium)	9.8893	0.07	/	/
94	Quizartinib	43.0996	0.02	/	/
95	Apocynin	-31.2915	0.1	/	/
96	Benzenebutyric acid	-61.1808	0.2	/	/
97	Autophinib	48.524	0.02	/	/
98	Dantrolene (sodium hemiheptahydrate)	43.2103	0.01	/	/
99	LY3009120	60.2583	0.01	/	/
100	Losmapimod	-10.4797	0.01	/	/
101	Lonafarnib	8.67159	0.17	/	/
102	CZC-25146	-11.9188	0.03	/	/
103	DMH-1	-78.2288	0.25	/	/
104	Memantine (hydrochloride)	-12.8044	0.2	/	/
105	GNE-7915	-35.2768	0.04	/	/
106	Rimonabant (Hydrochloride)	2.14022	0.08	/	/
107	Esmolol (hydrochloride)	-53.8745	0.05	/	/
108	Avermectin B1	56.3838	0	/	/
109	MRT68921 (hydrochloride)	62.6937	0.01	/	/
110	Thiamet G	-38.8192	0.14	/	/
111	Tempol	-12.0295	0.1	/	/
112	5-Aminolevulinic acid (hydrochloride)	-19.4465	0.07	/	/
113	Hemin	-63.3948	0.42	/	/
114	Sildenafil (citrate)	-8.81919	0.11	/	/
115	Citalopram (hydrobromide)	37.8967	0.1	/	/
116	Loperamide (hydrochloride)	63.69	0.01	95.18	0.05
117	Cediranib (maleate)	69.3358	0.01	/	/
118	Procainamide (hydrochloride)	-13.1365	0.05	/	/
119	PX-478	-34.3911	0.31	/	/
120	Quinacrine (dihydrochloride)	70.9963	0	/	/
121	Dexmedetomidine (hydrochloride)	65.1292	0.02	97.59	0.18
122	Lasalocid	64.2435	0	57.83	0.02
123	JH-II-127	71.2177	0	98.25	0.14
124	TPEN	67.0111	0.01	/	/
125	Schisandrin A	39.4465	0.08	/	/
126	URMC-099	78.1919	0.01	/	/
127	CGI-1746	63.1365	0.01	105.15	0.11
128	GNE-7915 (tosylate)	45.203	0.01	/	/
129	Kaempferide	56.1624	0	/	/
130	Nilotinib (monohydrochloride monohydrate)	62.8044	0	52.68	0.05
131	Proflavine (hemisulfate)	67.4539	0	/	/
132	Tepotinib	44.8708	0.05	/	/
133	Heparin (sodium salt)	-3.83764	0.03	/	/
134	Bromocriptine (mesylate)	69.7786	0	94.3	0.01
135	Azathramycin	-48.893	0.02	/	/
136	Licochalcone A	62.583	0.02	92.77	0.05
137	Lasalocid (sodium)	62.3616	0	64.62	0.02
138	Sofalcone	-26.9742	0.03	/	/
139	AR7	-36.1624	0.19	/	/
140	GSK2578215A	1.36531	0.05	/	/
141	Oprozomib	64.2435	0	/	/
142	A-867744	53.5055	0.03	/	/
143	JPH203 Dihydrochloride	8.45018	0.2	/	/
144	Scutellarein	12.6568	0.08	/	/
145	Bafetinib	66.679	0.03	92.22	0
146	Telaglenastat	17.1956	0.14	/	/
147	Ancitabine (hydrochloride)	9.11439	0.17	/	/
148	SR9009	18.524	0.11	/	/
149	Corosolic acid	-0.627306	0.05	/	/
150	Cisatracurium (besylate)	24.2804	0.02	/	/
151	JWH-133	-38.155	0.13	/	/
152	SMER28	56.4945	0.03	/	/
N/A: no detected
SD: standard deviation

## Sheet: Sheet2
Item Name	Plate Location	Tube Barcode	source	Smiles	CAS Number	Concentration	Molecular Weight	Catalog Number	Target	Brief description
AMG-073 HCl (Cinacalcet HCl)	2-E5	0150549438	S-inhibitor	C1(=C(C=C(C=C1)CCCN[C@@](C2=CC=CC3=C2C=CC=C3)(C)[H])C(F)(F)F).Cl	364782-34-3	10 mM	393.87	S1260	CaSR	AMG-073 HCl (Cinacalcet hydrochloride) represents a new class of compounds for the treatment of hyperparathyroidism.
Dapoxetine HCl (Priligy)	3-G9	0158617977	S-inhibitor	C1(=CC=C2C(=C1OCC[C@@H](C3=CC=CC=C3)N(C)C)C=CC=C2).Cl	129938-20-1	10 mM	341.87	S1869	5-HT Receptor	Dapoxetine hydrochloride is a short-acting novel selective serotonin reuptake inhibitor.
BIBR-1048 (Dabigatran etexilate, Pradaxa)	4-C9	0153713396	S-inhibitor	C1(=CC=C(C=C1)NCC2N(C3=C(N=2)C=C(C=C3)C(N(CCC(OCC)=O)C4=CC=CC=N4)=O)C)/C(=N\C(OCCCCCC)=O)N	211915-06-9	10 mM	627.73	S2154		BIBR-1048 (Dabigatran) is an anticoagulant from the class of the direct thrombin inhibitors.
OSI-420	4-F3	0153713443	S-inhibitor	C1(=C(C=CC=C1NC2=NC=NC3=C2C=C(C(=C3)OCCOC)OCCO)C#C).Cl	183320-51-6	10 mM	415.87	S2205	EGFR	OSI-420 is an active metabolite of Erlotinib which is an orally active EGFR inhibitor for inhibition of human EGFR and EGFR autophosphorylation with IC50 of 2 nM and 20 nM, respectively.
Bindarit	7-C10	0158616637	S-inhibitor	C(C(C)(OCC1=NN(C2C=CC=CC1=2)CC3C=CC=CC=3)C)(=O)O	130641-38-2	10 mM	324.37	S3032		Bindarit exhibits selective inhibition against monocyte chemotactic proteins MCP-1/CCL2, MCP-3/CCL7 and MCP-2/CCL8.
Dibucaine (Cinchocaine) HCl	7-F7	0158616688	S-inhibitor	C12(=C(C=C(N=C1C=CC=C2)OCCCC)C(NCCN(CC)CC)=O).Cl	61-12-1	10 mM	379.92	S4038	Sodium Channel	Dibucaine (Cinchocaine) HCl is a local anesthetics.
Item Name	Plate location	Tube Barcode	source	Smiles	CAS Number	Concentration	Max Conc.(mM)	Catalog Number	Target	Brief Description
AMG-073 HCl (Cinacalcet hydrochloride)	1-A5	0161154505	S-FDA	C1(=C(C=C(C=C1)CCCN[C@@](C2=CC=CC3=C2C=CC=C3)(C)[H])C(F)(F)F).Cl	364782-34-3	10 mM	200	S1260	CaSR	AMG-073 (Cinacalcet hydrochloride) represents a new class of compounds for the treatment of hyperparathyroidism.
Dapoxetine hydrochloride (Priligy)	1-D5	0150549986	S-FDA	C1(=CC=C2C(=C1OCC[C@@H](C3=CC=CC=C3)N(C)C)C=CC=C2).Cl	129938-20-1	10 mM	190	S1869	5-HT Receptor	Dapoxetine hydrochloride is a short-acting novel selective serotonin reuptake inhibitor.
BIBR-1048 (Dabigatran)	1-F5	0150549798	S-FDA	C1(=CC=C(C=C1)NCC2N(C3=C(N=2)C=C(C=C3)C(N(CCC(OCC)=O)C4=CC=CC=N4)=O)C)/C(=N\C(OCCCCCC)=O)N	211915-06-9	10 mM	200	S2154		Dabigatran etexilate (BIBR-1048) is an anticoagulant from the class of the direct thrombin inhibitors.
OSI-420 (Desmethyl Erlotinib)	1-F8	0150549799	S-FDA	C1(=C(C=CC=C1NC2=NC=NC3=C2C=C(C(=C3)OCCOC)OCCO)C#C).Cl	183320-51-6	10 mM	190	S2205	EGFR	OSI-420 (Desmethyl Erlotinib,CP-473420) is an active metabolite of erlotinib which is an orally active EGFR tyrosin kinase inhibitor with IC50 of 2 and 20 nM for the inhibition of human EGFR and EGFR autophosphorylation in tumor cells.
Bindarit	1-H9	0130353457	S-FDA	C(C(C)(OCC1=NN(C2C=CC=CC1=2)CC3C=CC=CC=3)C)(=O)O	130641-38-2	10 mM	200	S3032		Bindarit exhibits selective inhibition against monocyte chemotactic proteins MCP-1/CCL2, MCP-3/CCL7 and MCP-2/CCL8.
Dibucaine HCL	2-A6	0161147609	S-FDA	C12(=C(C=C(N=C1C=CC=C2)OCCCC)C(NCCN(CC)CC)=O).Cl	61-12-1	10 mM	200	S4038		Dibucaine (Cinchocaine) HCl is a local anesthetics.
ABT-263 (Navitoclax)	1-A2	0150550197	S-inhibitor	C1=CC(=CC=C1C2=C(CC(CC2)(C)C)CN3CCN(CC3)C4=CC=C(C=C4)C(NS(C5=CC(=C(C=C5)N[C@H](CCN6CCOCC6)CSC7=CC=CC=C7)S(C(F)(F)F)(=O)=O)(=O)=O)=O)Cl	923564-51-6	10 mM	974.61	S1001	Bcl-2	ABT-263 (Navitoclax) is a potent inhibitor of Bcl-xL, Bcl-2 and Bcl-w with Ki of ≤ 0.5 nM, ≤1 nM and ≤ 1 nM, respectively.
ABT-888 (Veliparib)	1-A3	0150550200	S-inhibitor	C1=CC=C2C(=C1C(N)=O)N=C(N2)[C@]3(NCCC3)C	912444-00-9	10 mM	244.29	S1004	PARP	ABT-888 (Veliparib, NSC 737664) is a potent inhibitor of PARP1 and PARP2 with Ki of 5.2 nM and 2.9 nM, respectively.
Saracatinib (AZD0530)	1-A4	0150550210	S-inhibitor	C1=C(C=C2C(=C1OC3CCOCC3)C(=NC=N2)NC4=C(C=CC5=C4OCO5)Cl)OCCN6CCN(CC6)C	379231-04-6	10 mM	542.03	S1006	Bcr-Abl	Saracatinib (AZD0530) is a Src inhibitor for c-Src and v-Abl with IC50 of 2.7 nM and 30 nM, respectively.
FG-4592	1-A5	0150550260	S-inhibitor	C12=C(C(=NC(=C1O)C(NCC(O)=O)=O)C)C=C(C=C2)OC3=CC=CC=C3	808118-40-3	10 mM	352.34	S1007	HIF	FG-4592 is an HIF α prolyl hydroxylase inhibitor.
AZD6244 (Selumetinib)	1-A6	0150550236	S-inhibitor	C1=C2C(=C(C(=C1C(NOCCO)=O)NC3=CC=C(C=C3Cl)Br)F)N=CN2C	606143-52-6	10 mM	457.68	S1008	MEK	AZD6244 (Selumetinib, ARRY-142886) is highly potent to inhibit MEK1 with IC50 of 14 nM.
BEZ235 (NVP-BEZ235)	1-A7	0150550237	S-inhibitor	C12=CN=C3C(=C1N(C(N2C)=O)C4=CC=C(C=C4)C(C#N)(C)C)C=C(C=C3)C5=CC6=C(N=C5)C=CC=C6	915019-65-7	10 mM	469.55	S1009	ATM/ATR	BEZ235 (NVP-BEZ235) is a dual ATP-competitive PI3K and mTOR inhibitor of p110α, p110γ, p110δ and p110β with IC50 of 4 nM, 5 nM, 7 nM and 75 nM, respectively, and also inhibits ATR with IC50 of 21 nM.
Afatinib (BIBW2992)	1-A8	0150550178	S-inhibitor	C1(=C(C=C(C=C1)NC2=NC=NC3=C2C=C(C(=C3)O[C@H]4CCOC4)NC(/C=C/CN(C)C)=O)Cl)F	439081-18-2	10 mM	485.94	S1011	EGFR	BIBW2992 (Afatinib, Tomtovok, Tovok) irreversibly inhibits EGFR/HER2 including EGFRwt, EGFRL858R, EGFRL858R/T790M and HER2 with IC50 of 0.5 nM, 0.4 nM, 10 nM and 14 nM, respectively.
Bosutinib (SKI-606)	1-A9	0150550257	S-inhibitor	N1=CC(=C(C2=CC(=C(C=C12)OCCCN3CCN(CC3)C)OC)NC4C(=CC(=C(C=4)OC)Cl)Cl)C#N	380843-75-4	10 mM	530.45	S1014	Src	Bosutinib (SKI-606) is a novel, dual Src/Abl inhibitor with IC50 of 1.2 nM and 1 nM, respectively.
Cediranib (AZD2171)	1-A10	0150550259	S-inhibitor	C1(=C(C=C2C(=C1)C(=NC=N2)OC3=C(C4=C(C=C3)NC(=C4)C)F)OCCCN5CCCC5)OC	288383-20-0	10 mM	450.51	S1017	VEGFR	Cediranib (AZD2171) is a highly potent VEGFR2 inhibitor with IC50 of 0.5 nM, also inhibits Flt1/4 with IC50 of 5 nM/≤3 nM.
Dovitinib (TKI-258)	1-A11	0150550234	S-inhibitor	C1=CC=C(C2=C1NC(C(=C2N)C3NC4=C(N=3)C=CC(=C4)N5CCN(CC5)C)=O)F	405169-16-6	10 mM	392.43	S1018	c-Kit	Dovitinib (TKI258, CHIR258) is a novel multi-target inhibitor for Flt3, c-Kit, FGFR1/3, VEGFR1/2/3, PDGFRα/β with IC50 of 1 nM, 2 nM, 8 nM/9 nM and 10 nM/13 nM/8 nM, 210 nM/27 nM respectively.
CI-1033 (Canertinib)	1-B2	0150550238	S-inhibitor	C1(=C(C=C2C(=C1)C(=NC=N2)NC3=CC(=C(C=C3)F)Cl)OCCCN4CCOCC4)NC(C=C)=O	267243-28-7	10 mM	485.94	S1019	EGFR	CI-1033 is a potent inhibitor of EGFR and ErbB2 with IC50 of 1.5 nM and 9.0 nM, respectively.
CI-1040 (PD184352)	1-B3	0150550262	S-inhibitor	C1=C(C(=C(C(=C1)C(NOCC2CC2)=O)NC3=CC=C(C=C3Cl)I)F)F	212631-79-3	10 mM	478.67	S1020	MEK	CI-1040 (PD 184352) is an ATP non-competitive MEK1/2 inhibitor with IC50 of 17 nM.
Dasatinib (BMS-354825)	1-B4	0150550233	S-inhibitor	N1=C(N=C(C=C1NC2=NC=C(S2)C(NC3=C(C=CC=C3C)Cl)=O)N4CCN(CC4)CCO)C	302962-49-8	10 mM	488.01	S1021	Bcr-Abl	Dasatinib (BMS-354825, Sprycel) is a novel, potent and multi-targeted inhibitor that targets Abl, Src and c-Kit, with IC50 of ＜1 nM, 0.5 nM and 79 nM, respectively.
Deforolimus (Ridaforolimus)	1-B5	0150550258	S-inhibitor	[C@H]1(C[C@@H](CC[C@@H]1OP(C)(=O)C)C[C@H]([C@@H]2CC([C@@H](/C=C(/[C@H]([C@@H](OC)C([C@@H](C[C@@H](/C=C/C=C/C=C(/[C@H](C[C@]3(CC[C@H]([C@](C(C(N4[C@](C(O2)=O)(CCCC4)[H])=O)=O)(O3)O)C)[H])OC)C)C)C)=O)O)C)C)=O)C)OC	572924-54-0	10 mM	990.21	S1022	mTOR	Deforolimus (Ridaforolimus, AP23573, MK-8669) is a selective mTOR inhibitor with IC50 of 0.2 nM.
Lapatinib Ditosylate (Tykerb)	1-B6	0150550264	S-inhibitor	C1(=C(C=C2C(=C1)N=CN=C2NC3=CC=C(C(=C3)Cl)OCC4=CC=CC(=C4)F)C5OC(=CC=5)CNCCS(=O)(C)=O).C6(=C(C=CC(=C6)S(O)(=O)=O)C).C7=C(C=CC(=C7)S(O)(=O)=O)C	388082-77-7	10 mM	925.46	S1028	EGFR	Lapatinib Ditosylate (GW572016, GW2016, Tykerb, Tyverb) is a potent EGFR and ErbB2 inhibitor with IC50 of 10.8 and 9.2 nM, respectively.
Motesanib Diphosphate (AMG-706)	1-B7	0150550240	S-inhibitor	C1(=CN=CC=C1CNC2=C(C=CC=N2)C(=O)NC3=CC=C4C(=C3)NCC4(C)C).P(O)(=O)(O)O.P(O)(=O)(O)O	857876-30-3	10 mM	569.44	S1032	c-Kit	Motesanib Diphosphate (AMG-706) is a potent ATP-competitive inhibitor of VEGFR1/2/3, PDGFR, c-Kit and Ret with IC50 of 2 nM/3 nM/6 nM, 84 nM, 8 nM and 59 nM, respectively.
Nilotinib (AMN-107)	1-B8	0150550213	S-inhibitor	C1(=CC=C(C(=C1)NC2=NC=CC(=N2)C3=CN=CC=C3)C)C(=O)NC4=CC(=CC(=C4)N5C=C(N=C5)C)C(F)(F)F	641571-10-0	10 mM	529.52	S1033	Bcr-Abl	Nilotinib (AMN-107, Tasigna) is a Bcr-Abl inhibitor with IC50 less than 30 nM.
NVP-AEW541	1-B9	0150550214	S-inhibitor	C1=CC(=CC(=C1)OCC2=CC=CC=C2)C3=CN(C4=C3C(=NC=N4)N)[C@@H]5C[C@@H](C5)CN6CCC6	475489-16-8	10 mM	439.55	S1034	IGF-1R	NVP-AEW541 is a potent inhibitor of IGF-1R with IC50 of 86 nM.
Pazopanib HCl	1-B10	0150550235	S-inhibitor	C1(=C(C(=CC(=C1)NC2=NC=CC(=N2)N(C3C=CC4C(C=3)=NN(C=4C)C)C)S(=O)(N)=O)C).Cl	635702-64-6	10 mM	473.98	S1035	c-Kit	Pazopanib Hydrochloride (GW786034, Votrient, Armala) is a novel multi-target inhibitor of VEGFR1, VEGFR2, VEGFR3, PDGFR, FGFR, c-Kit and c-Fms with IC50 of 10 nM, 30 nM, 47 nM, 84 nM, 74 nM, 140 nM and 146 nM, respectively.
PD0325901	1-B11	0150550215	S-inhibitor	C1=CC(=C(C(=C1C(=O)NOC[C@H](O)CO)NC2=CC=C(C=C2F)I)F)F	391210-10-9	10 mM	482.19	S1036	MEK	PD0325901 (PD325901) is selective and non ATP-competitive MEK inhibitor with IC50 of 0.33 nM.
Sorafenib (Nexavar)	1-C2	0150550254	S-inhibitor	C1(=CC=C(C=C1C(F)(F)F)NC(NC2=CC=C(C=C2)OC3=CC=NC(=C3)C(NC)=O)=O)Cl.C4=CC(=CC=C4S(O)(=O)=O)C	475207-59-1	10 mM	637.03	S1040	PDGFR	Sorafenib Tosylate (Bay 43-9006, Nexavar) is a multikinase inhibitor of Raf-1, B-Raf and VEGFR-2 with IC50 of 6 nM, 22 nM and 90 nM, respectively.
STF-62247	1-C3	0150550209	S-inhibitor	N1=CC=C(C=C1)C2=CSC(=N2)NC3=CC=CC(=C3)C	315702-99-9	10 mM	267.35	S1041		STF-62247 is selectively toxic and growth inhibitory to renal cells lacking VHL
Sunitinib Malate (Sutent)	1-C4	0150550244	S-inhibitor	C1(=CC=C2C(=C1)/C(C(N2)=O)=C/C3NC(=C(C=3C)C(NCCN(CC)CC)=O)C)F.C(C[C@@H](C(O)=O)O)(O)=O	341031-54-7	10 mM	532.56	S1042	c-Kit	Sunitinib Malate (Sutent, SU11248) is a multi-targeted RTK inhibitor targeting VEGFR2 (Flk-1) and PDGFRβ with IC50 of 80 nM and 2 nM, and also inhibits c-Kit.
Temsirolimus (Torisel)	1-C5	0150550241	S-inhibitor	[C@H]1(C[C@@H](CC[C@@H]1OC(C(CO)(CO)C)=O)C[C@H]([C@@H]2CC([C@@H](/C=C(/[C@H]([C@@H](OC)C([C@@H](C[C@@H](/C=C/C=C/C=C(/[C@H](C[C@]3(CC[C@H]([C@](C(C(N4[C@](C(O2)=O)(CCCC4)[H])=O)=O)(O3)O)C)[H])OC)C)C)C)=O)O)C)C)=O)C)OC	162635-04-3	10 mM	1030.29	S1044	mTOR	Temsirolimus (CCI-779, Torisel) is a specific mTOR inhibitor with IC50 of 1.76 μM.
Vandetanib (Zactima)	1-C6	0150550191	S-inhibitor	C12=C(C(=NC=N1)NC3=C(C=C(C=C3)Br)F)C=C(C(=C2)OCC4CCN(CC4)C)OC	443913-73-3	10 mM	475.35	S1046	VEGFR	Vandetanib (Zactima, ZD6474) is a potent inhibitor of VEGFR2 with IC50 of 40 nM.
VX-680 (MK-0457, Tozasertib)	1-C7	0150550190	S-inhibitor	C1(=CC(=NC(=N1)SC2=CC=C(C=C2)NC(=O)C3CC3)N4CCN(CC4)C)NC5C=C(NN=5)C	639089-54-6	10 mM	464.59	S1048	Aurora Kinase	VX-680 (MK-0457, Tozasertib) is a pan-Aurora inhibitor of Aurora A, Aurora B and Aurora C with Kiapp of 0.6 nM, 18 nM and 4.6 nM, respectively.
Y-27632 2HCl	1-C8	0150550217	S-inhibitor	[C@@H]1(CC[C@@H](CC1)[C@@H](C)N)C(=O)NC2(C=CN=CC=2).Cl.Cl	129830-38-2	10 mM	320.26	S1049	Autophagy	Y-27632 2HCl is a selective ROCK1 (p160ROCK) inhibitor with Ki of 140 nM.
Elesclomol	1-C9	0150550207	S-inhibitor	C1=CC=C(C=C1)C(N(NC(CC(NN(C)C(=S)C2=CC=CC=C2)=O)=O)C)=S	488832-69-5	10 mM	400.5	S1052	HSP (e.g. HSP90)	Elesclomol (STA-4783) is a novel potent oxidative stress inducer that illicits pro-apoptosis events among tumor cells..
Entinostat (MS-275, SNDX-275)	1-C10	0150550230	S-inhibitor	C1=C(C=CC(=C1)C(NC2=CC=CC=C2N)=O)CNC(OCC3=CN=CC=C3)=O	209783-80-2	10 mM	376.41	S1053	HDAC	MS-275 is an HDAC inhibitor of HDAC1 and HDAC3 with IC50 of 0.51 μM and 1.7 μM, respectively.
Enzastaurin (LY317615)	1-C11	0150550189	S-inhibitor	C1=CC=C2C(=C1)C(=CN2C3CCN(CC3)CC4=NC=CC=C4)C5C(NC(C=5C6C7C(N(C=6)C)=CC=CC=7)=O)=O	170364-57-5	10 mM	515.61	S1055	PKC	Enzastaurin (LY317615) is a potent PKC inhibitor for PKCβ, PKCα, PKCγ and PKCε with IC50 of 6 nM, 39 nM, 83 nM and 110 nM, respectively.
BMS-599626 (AC480)	1-D2	0150550205	S-inhibitor	C1(CN[C@@H](CO1)COC(NC2=CN3C(=C2C)C(=NC=N3)NC4=CC5=C(C=C4)N(N=C5)CC6=CC(=CC=C6)F)=O).Cl	714971-09-2	10 mM	567.01	S1056	EGFR	BMS-599626 (AC480) is a selective and efficacious inhibitor of HER1 and HER2 with IC50 of 20 nM and 30 nM, respectively.
Obatoclax mesylate (GX15-070)	1-D3	0150550218	S-inhibitor	C1(=CC=C2C(=C1)C=C(N2)C3C=C(/C(N=3)=C/C4=C(C=C(N4)C)C)OC).CS(=O)(=O)O	803712-79-0	10 mM	413.49	S1057	Autophagy	Obatoclax (GX15-070) is an inhibitor of Bcl-2 with Ki of 0.22 μM.
Olaparib (AZD2281)	1-D4	0150550186	S-inhibitor	C1=CC=CC2=C1C(=NNC2=O)CC3=CC(=C(C=C3)F)C(N4CCN(CC4)C(=O)C5CC5)=O	763113-22-0	10 mM	434.46	S1060	PARP	Olaparib (AZD2281, KU0059436) is a selective inhibitor of PARP1 and PARP2 with IC50 of 5 nM and 1 nM, respectively.
Nutlin-3	1-D5	0150550206	S-inhibitor	N1(C(C(N=C1C2=C(C=C(C=C2)OC)OC(C)C)C3=CC=C(C=C3)Cl)C4=CC=C(C=C4)Cl)C(=O)N5CCNC(C5)=O	890090-75-2	10 mM	581.5	S1061	E3 Ligase	Nutlin-3 is a potent and selective Mdm2 (RING finger-dependent ubiquitin protein ligase for itself and p53) antagonist with IC50 of 90 nM.
Masitinib (AB1010)	1-D6	0150550195	S-inhibitor	C1(=C(C=C(C=C1)NC(=O)C2=CC=C(C=C2)CN3CCN(CC3)C)NC4=NC(=CS4)C5=CC=CN=C5)C	790299-79-5	10 mM	498.64	S1064	c-Kit	Masitinib is a novel tyrosine kinases inhibitor for Kit and PDGFRα/β with IC50 of 200 nM and 540 nM/800 nM, resectively.
Crizotinib (PF-02341066)	1-D7	0150550196	S-inhibitor	C1(=CC(=C(N=C1)N)O[C@@H](C2=C(C=CC(=C2Cl)F)Cl)C)C3=CN(N=C3)C4CCNCC4	877399-52-5	10 mM	450.34	S1068	ALK	PF-2341066 (Crizotinib) is a potent inhibitor of c-Met and ALK with IC50 of 11 nM and 24 nnM, respectivley.
AUY922 (NVP-AUY922)	1-D8	0150550220	S-inhibitor	C1(=CC(=C(C=C1C2=C(C(=NO2)C(=O)NCC)C3=CC=C(C=C3)CN4CCOCC4)C(C)C)O)O	747412-49-3	10 mM	465.54	S1069	HSP (e.g. HSP90)	NVP-AUY922 (VER-52296) is a highly potent HSP90 inhibitor for HSP90α and HSP90β with IC50 of 13 nM and 21 nM, respectively.
PHA-665752	1-D9	0150550247	S-inhibitor	C1=CC=C(C(=C1Cl)CS(C2=CC3=C(C=C2)NC(C/3=C/C4=C(C(=C(N4)C)C(N5[C@H](CCC5)CN6CCCC6)=O)C)=O)(=O)=O)Cl	477575-56-7	10 mM	641.61	S1070	c-Met	PHA-665752 is a potent, selective and ATP-competitive c-Met inhibitor with IC50 of 9 nM.
ZSTK474	1-D10	0150550179	S-inhibitor	N1=C(N=C(N=C1N2CCOCC2)N3C4=C(N=C3C(F)F)C=CC=C4)N5CCOCC5	475110-96-4	10 mM	417.41	S1072	PI3K	ZSTK474 is a potent pan-class I PI3K inhibitor with IC50 of 37 nM.
MK-2206 2HCl	1-D11	0150550194	S-inhibitor	C1(=CC=CC=C1)C2(=C(N=C3C(=C2)C4N(C=C3)C(NN=4)=O)C5=CC=C(C=C5)C6(CCC6)N).Cl.Cl	1032350-13-2	10 mM	480.39	S1078	Akt	MK-2206 2HCl is a highly selective inhibitor of Akt1, Akt2 and Akt3 with IC50 of 8 nM, 12 nM and 65 nM, respectively.
PD153035 HCl	1-E2	0150550251	S-inhibitor	C1(=C(C=C2C(=C1)C(=NC=N2)NC3=CC(=CC=C3)Br)OC)OC.Cl	183322-45-4	10 mM	396.67	S1079	EGFR	PD153035 is a potent and specific inhibitor of EGFR with Ki and IC50 of 5.2 pM and 29 pM, respectively.
Vismodegib (GDC-0449)	1-E3	0150550185	S-inhibitor	C1(=C(C=C(C=C1)NC(C2=CC=C(C=C2Cl)S(C)(=O)=O)=O)C3=NC=CC=C3)Cl	879085-55-9	10 mM	421.3	S1082	Hedgehog	GDC-0449 (Vismodegib, HhAntag691) is a potent, novel and specific hedgehog inhibitor with IC50 of 3 nM and also inhibits P-gp with IC50 of 3.0 μM.
Brivanib (BMS-540215)	1-E4	0150550226	S-inhibitor	C12=C(C(=C(C=C1)OC3=NC=NN4C3=C(C(=C4)OC[C@@H](C)O)C)F)C=C(N2)C	649735-46-6	10 mM	370.38	S1084	FGFR	Brivanib is an ATP-competitive inhibitor against human VEGFR2 and FGFR with IC50 of 25 nM and 148 nM, respectively.
Belinostat (PXD101)	1-E5	0150550271	S-inhibitor	C1(=CC=CC(=C1)/C=C/C(NO)=O)S(NC2=CC=CC=C2)(=O)=O	414864-00-9	10 mM	318.35	S1085	HDAC	Belinostat (PXD101) is a novel HDAC inhibitor with IC50 of 27 nM in HeLa cell extracts.
Iniparib (BSI-201)	1-E6	0150550245	S-inhibitor	C1=CC(=C(C=C1C(N)=O)[N+](=O)[O-])I	160003-66-7	10 mM	292.03	S1087	PARP	BSI-201 (Iniparib, SAR240550) is a PARP1 inhibitor.
NVP-ADW742	1-E7	0150550193	S-inhibitor	C12=C(N=CN=C1N)N(C=C2C3=CC(=CC=C3)OCC4=CC=CC=C4)[C@@H]5C[C@H](C5)CN6CCCC6	475488-23-4	10 mM	453.58	S1088	IGF-1R	NVP-ADW742 is an IGF-1R inhibitor with IC50 of 0.17 μM.
PCI-24781	1-E8	0150550211	S-inhibitor	C1=CC=C2C(=C1)OC(=C2CN(C)C)C(=O)NCCOC3=CC=C(C=C3)C(=O)NO	783355-60-2	10 mM	397.42	S1090	HDAC	PCI-24781 (CRA-024781) is a novel broad spectrum HDAC inhibitor targeting HDAC1, HDAC2, HDAC3, HDAC6, HDAC8 and HDAC10 with Ki of 7 nM, 19 nM, 8.2 nM, 17 nM, 280 nM, 24 nM, respectively.
Linsitinib (OSI-906)	1-E9	0150550224	S-inhibitor	C1=C(C=C2C(=C1)C=CC(=N2)C3=CC=CC=C3)C4=C5N(C(=N4)[C@H]6C[C@@](C6)(C)O)C=CN=C5N	867160-71-2	10 mM	421.49	S1091	IGF-1R	OSI-906 (Linsitinib) is a selective inhibitor of IGF-1R and IR with IC50 of 35 nM and 75 nM, respectively.
GSK1904529A	1-E10	0150550229	S-inhibitor	C1=C(C(=C(C=C1)F)NC(C2=C(C=CC(=C2)C3=C(N4C(=N3)C=CC=C4)C5=CC=NC(=N5)NC6=C(C=C(C(=C6)CC)N7CCC(CC7)N8CCN(CC8)S(C)(=O)=O)OC)OC)=O)F	1089283-49-7	10 mM	851.96	S1093	IGF-1R	GSK1904529A is a selective inhibitor of IGF-1R and IR with IC50 of 27 nM and 25 nM, respectively.
PF-04217903	1-E11	0150550246	S-inhibitor	C12=CC=CN=C1C=CC(=C2)CN3C4=C(N=N3)N=CC(=N4)C5=CN(N=C5)CCO	956905-27-4	10 mM	372.38	S1094	c-Met	PF-04217903 is a selective ATP-competitive c-Met inhibitor with IC50 of 4.8 nM.
LAQ824 (NVP-LAQ824, Dacinostat)	1-F2	0150550249	S-inhibitor	C1(=CC=C(C=C1)CN(CCO)CCC2=CNC3=C2C=CC=C3)/C=C/C(NO)=O	404951-53-7	10 mM	379.459	S1095	HDAC	LAQ824 (NVP-LAQ824) is a novel HDAC inhibitor with IC50 of 32 nM.
JNJ-26481585	1-F3	0150550242	S-inhibitor	C1=CC=C2C(=C1)C(=CN2C)CNCC3CCN(CC3)C4=NC=C(C=N4)C(=O)NO	875320-29-9	10 mM	394.476	S1096	HDAC	JNJ-26481585 (Quisinostat) is an HDAC inhibitor for HDAC1, HDAC2, HDAC4, HDAC10 and HDAC11 with IC50 of 0.11 nM, 0.33 nM, 0.64 nM, 0.46 nM and 0.37 nM, respectively.
BTZ043 racemate	1-F4	0150550219	S-inhibitor	C1(=CC(=C2C(=C1)C(N=C(S2)N3CCC4(CC3)OCC(O4)C)=O)[N+](=O)[O-])C(F)(F)F	957217-65-1	10 mM	431.39	S1097		BTZ043 racemate is a decaprenylphosphoryl-β-D-ribose 2'-epimerase (DprE1) inhibitor acting as a new antimycobacterial agent that kill Mycobacterium tuberculosis.
Rucaparib (AG-014699 , PF-01367338)	1-F5	0150550252	S-inhibitor	C1(C2C=CC(=CC=2)CNC)(=C3C4=C(N1)C=C(C=C4C(NCC3)=O)F).P(=O)(O)(O)O	459868-92-9	10 mM	421.36	S1098	PARP	Rucaparib (AG-014699, PF-01367338) is an inhibitor of PARP with Ki of 1.4 nM.
MLN8054	1-F6	0150550250	S-inhibitor	C1=C(C=C2C(=C1)C3=C(CN=C2C4=C(C=CC=C4F)F)C=NC(=N3)NC5=CC=C(C=C5)C(=O)O)Cl	869363-13-3	10 mM	476.86	S1100	Aurora Kinase	MLN8054 is a potent and selective inhibitor of Aurora A with IC50 of 4 nM.
Vatalanib 2HCl (PTK787)	1-F7	0150550221	S-inhibitor	C1(=CC=C2C(=C1)C(=NN=C2CC3=CC=NC=C3)NC4=CC=C(C=C4)Cl).Cl.Cl	212141-51-0	10 mM	419.73	S1101	c-Kit	Vatalanib (PTK787) is an inhibitor of VEGFR2/KDR, Flt-1 and c-Kit with IC50 of 37 nM, 77 nM and 730 nM, respectively.
U0126-EtOH	1-F8	0150550181	S-inhibitor	C1(=CC=C(C(=C1)SC(/N)=C(\C(=C(\SC2=C(C=CC=C2)N)N)C#N)C#N)N).CCO	1173097-76-1	10 mM	426.56	S1102	MEK	U0126-EtOH is a highly selective inhibitor of MEK1 and MEK2 with IC50 of 0.07 μM and 0.06 μM, respectively.
ZM-447439	1-F9	0150550253	S-inhibitor	O1CCN(CC1)CCCOC2=C(C=C3C(=C2)N=CN=C3NC4=CC=C(C=C4)NC(=O)C5=CC=CC=C5)OC	331771-20-1	10 mM	513.59	S1103	Aurora Kinase	ZM-447439 is a selective and ATP-competitive inhibitor for Aurora A and Aurora B with IC50 of 110 nM and 130 nM, respectively.
GDC-0879	1-F10	0150550255	S-inhibitor	C(CN1N=C(C(=C1)C2=CC=C3C(=C2)CCC/3=N/O)C4C=CN=CC=4)O	905281-76-7	10 mM	334.37	S1104	Raf	GDC-0879 is a novel potent, selective B-Raf inhibitor for B-RafV600E with IC50 of 0.13 nM.
OSU-03012 (AR-12)	1-F11	0150550266	S-inhibitor	C12=C(C=CC3=C1C=CC(=C3)C4=CC(=NN4C5=CC=C(C=C5)NC(CN)=O)C(F)(F)F)C=CC=C2	742112-33-0	10 mM	460.45	S1106	PDK-1	OSU-03012 is a potent inhibitor of recombinant PDK-1 with IC50 of 5 μM.
Danusertib (PHA-739358)	1-G2	0150550183	S-inhibitor	C1(=CC=CC=C1)[C@H](C(N2CC3=C(C2)C(=NN3)NC(=O)C4=CC=C(C=C4)N5CCN(CC5)C)=O)OC	827318-97-8	10 mM	474.55	S1107	Aurora Kinase	Danusertib (PHA-739358) is an Aurora inhibitor for Aurora A/B/C, Bcr-Abl, c-RET and FGFR with IC50 of 13 nM/79 nM/61 nM, 25 nM, 31 nM and 47 nM, respectively.
TAE684 (NVP-TAE684)	1-G3	0150550265	S-inhibitor	C1=CC(=CC(=C1NC2=NC=C(C(=N2)NC3=C(C=CC=C3)S(=O)(=O)C(C)C)Cl)OC)N4CCC(CC4)N5CCN(CC5)C	761439-42-3	10 mM	614.2	S1108	ALK	TAE684 is a potent and selective ALK inhibitor with IC50 of 3 nM.
BI 2536	1-G4	0150550267	S-inhibitor	C1(=CC=C(C(=C1)OC)NC2=NC=C3C(=N2)N([C@@H](C(N3C)=O)CC)C4CCCC4)C(NC5CCN(CC5)C)=O	755038-02-9	10 mM	521.66	S1109	PLK	BI 2536 is a potent Plk1 inhibitor with IC50 of 0.83 nM.
Varespladib (LY315920)	1-G5	0150550180	S-inhibitor	C1(N(C2=C(C=1C(C(N)=O)=O)C(=CC=C2)OCC(=O)O)CC3=CC=CC=C3)CC	172732-68-2	10 mM	380.39	S1110	Phospholipase (e.g. PLA)	LY315920 (Varespladib) is a potent and selective secretory phospholipase A2 (sPLA) inhibitor with IC50 of 7 nM.
Foretinib (GSK1363089, XL880)	1-G6	0150550849	S-inhibitor	C1(=CC=C(C=C1)F)NC(C2(C(NC3=CC(=C(C=C3)OC4C5=C(N=CC=4)C=C(C(=C5)OC)OCCCN6CCOCC6)F)=O)CC2)=O	849217-64-7	10 mM	632.65	S1111	c-Met	XL880 (GSK1363089, EXEL-2880) is an ATP-competitive inhibitor of MET and KDR with IC50 of 0.4 nM and 0.9 nM, respectively.
SGX-523	1-G7	0150550850	S-inhibitor	C1=C2C(=CC(=C1)SC3N4C(=NN=3)C=CC(=N4)C5C=NN(C=5)C)C=CC=N2	1022150-57-7	10 mM	359.41	S1112	c-Met	SGX-523 is a selective Met inhibitor with IC50 of 4 nM.
JNJ-38877605	1-G8	0150550860	S-inhibitor	N1=CC=CC2=C1C=CC(=C2)C(C3N4C(=NN=3)C=CC(=N4)C5C=NN(C=5)C)(F)F	943540-75-8	10 mM	377.35	S1114	c-Met	JNJ-38877605 is an ATP-competitive inhibitor of c-Met with IC50 of 4 nM.
Odanacatib (MK 0822)	1-G9	0150550887	S-inhibitor	C1=C(C=CC(=C1)C2=CC=C(C=C2)[C@H](N[C@H](C(=O)NC3(C#N)CC3)CC(C)(C)F)C(F)(F)F)S(=O)(=O)C	603139-19-1	10 mM	525.56	S1115	Cathepsin K	Odanacatib (MK 0822) is a potent, selective, and neutral inhibitor of human and rabbit cathepsin K with IC50 of 0.2 nM and 1 nM , respectively.
PD 0332991 (Palbociclib) HCl	1-G10	0150550883	S-inhibitor	N1(=C(N=C2C(=C1)C(=C(C(N2C3CCCC3)=O)C(C)=O)C)NC4=NC=C(C=C4)N5CCNCC5).Cl	827022-32-2	10 mM	483.99	S1116	CDK	PD 0332991 is a highly selective inhibitor of CDK4/cyclin D1 and CDK6/cyclin D2 with IC50 of 11 nM and 16 nM, respectively.
XL147	1-G11	0150550903	S-inhibitor	C1=CC=C2C(=C1)N=C(C(=N2)NS(=O)(=O)C3=CC=C(C=C3)C)NC4=CC5C(C=C4)=NSN=5	956958-53-5	10 mM	448.52	S1118	PI3K	XL147 (SAR245408) is a selective and reversible class I PI3K inhibitor for wild type and mutant p110α with IC50 of 40 nM and 40 nM, respectively.
XL-184 (Cabozantinib)	1-H2	0150550904	S-inhibitor	C12=C(C(=CC=N1)OC3=CC=C(C=C3)NC(C4(C(NC5=CC=C(C=C5)F)=O)CC4)=O)C=C(C(=C2)OC)OC	849217-68-1	10 mM	501.51	S1119	Axl	XL184 (Cabozantinib) is a potent VEGFR2 inhibitor with IC50 of 0.035 nM and also inhibits c-Met, Ret, Kit, Flt-1/3/4, Tie2, and AXL with IC50 of 1.3 nM, 4 nM, 4.6 nM, 12 nM/11.3 nM/6 nM, 14.3 nM and 7 nM, respectively.
Everolimus (RAD001)	1-H3	0150550886	S-inhibitor	C(O)CO[C@H]1[C@@H](C[C@@H](CC1)C[C@@H]([C@H]2OC(=O)[C@@H]3CCCCN3C(=O)C([C@]4([C@@H](CC[C@H](O4)C[C@@H](/C(=C/C=C/C=C/[C@H](C[C@H](C([C@@H]([C@@H](O)/C(=C/[C@H](C(C2)=O)C)C)OC)=O)C)C)C)OC)C)O)=O)C)OC	159351-69-6	10 mM	958.22	S1120	mTOR	Everolimus (RAD001) is an mTOR inhibitor of FKBP12 with IC50 of 1.6-2.4 nM.
TW-37	1-H4	0150550870	S-inhibitor	C1=CC=CC(=C1C(C)(C)C)S(C2=CC=C(C=C2)NC(C3=C(C(=C(C(=C3)CC4=CC=CC=C4C(C)C)O)O)O)=O)(=O)=O	877877-35-5	10 mM	573.7	S1121	Bcl-2	TW-37 is a novel nonpeptide inhibitor to recombinant Bcl-2, Bcl-xL and Mcl-1 with Ki of 0.29 μM, 1.11 μM and 0.26 μM, respectively.
Mocetinostat (MGCD0103)	1-H5	0158618459	S-inhibitor	C(C1C=CC(=CC=1)CNC2N=C(C=CN=2)C3C=NC=CC=3)(=O)NC4C(=CC=CC=4)N	726169-73-9	10 mM	396.44	S1122	HDAC	MGCD0103 (Mocetinostat) is a potent HDAC inhibitor for HDAC1, HDAC2 and HDAC3 with IC50 of 0.15 μM, 0.29 μM and 1.66 μM, respectively.
Abiraterone (CB-7598)	1-H6	0150550908	S-inhibitor	C1[C@@H](CC2[C@](C1)([C@]3([C@@](CC=2)([C@]4([C@](CC3)(C(=CC4)C5=CN=CC=C5)C)[H])[H])[H])C)O	154229-19-3	10 mM	349.51	S1123	P450 (e.g. CYP17)	Abiraterone (CB-7598) is a potent CYP17 inhibitor with IC50 of 2 nM.
SRT1720	1-H7	0150550888	S-inhibitor	N1(=C(C=NC2=CC=CC=C12)C(=O)NC3C(=CC=CC=3)C4N=C5SC=C(N5C=4)CN6CCNCC6).Cl	1001645-58-4	10 mM	506.02	S1129	Sirtuin	SRT1720 is a selective SIRT1 activator with EC1.5 of 0.16 μM.
YM155	1-H8	0150550884	S-inhibitor	C1(=CC=C2C(=C1)C(C3=C(C2=O)N(C(=N3CC4=NC=CN=C4)C)CCOC)=O).[Br-]	781661-94-7	10 mM	443.29	S1130	E3 Ligase	YM155 is a potent IAP (inhibitor of apoptosis protein via E3 ubiquitin ligase) inhibitor for survivin with IC50 of 0.54 nM.
MLN8237 (Alisertib)	1-H9	0150550885	S-inhibitor	C1=CC=C(C(=C1OC)C2=NCC3=C(C4=C2C=C(C=C4)Cl)N=C(N=C3)NC5=CC(=C(C=C5)C(O)=O)OC)F	1028486-01-2	10 mM	518.92	S1133	Aurora Kinase	MLN8237 (Alisertib) is a selective Aurora A inhibitor with IC50 of 1.2 nM.
Pemetrexed (Alimta)	1-H10	0150550932	S-inhibitor	C([C@H](NC(C1C=CC(=CC=1)CCC2=CNC3NC(=NC(C=32)=O)N)=O)CCC(=O)[O-])(=O)[O-].[Na+].[Na+]	150399-23-8	10 mM	471.37	S1135	DHFR	Pemetrexed disodium (Alimta) is a novel antifolate and antimetabolite for TS, DHFR and GARFT with Ki of 1.3 nM, 7.2 nM and 65 nM, respectively.
Brivanib alaninate (BMS-582664)	1-H11	0150550931	S-inhibitor	C12=C(C(=C(C=C1)OC3=NC=NN4C3=C(C(=C4)OC[C@@H](C)OC([C@@H](N)C)=O)C)F)C=C(N2)C	649735-63-7	10 mM	441.46	S1138	FGFR	BMS-582664 is an oral VEGFR/FGFR inhibitor for VEGFR2, Flk1, VEGFR1 and FGFR1 with IC50 of 25 nM, 89 nM, 380 nM and 148 nM, respectively.
ADL5859 HCl	2-A2	0150550907	S-inhibitor	C1(=CC=C2C(=C1O)C(=CC3(O2)CCNCC3)C4=CC=C(C=C4)C(=O)N(CC)CC).Cl	850173-95-4	10 mM	428.95	S1139	Opioid Receptor	ADL5859 HCl is a δ-opioid receptor agonist with Ki of 0.8 nM.
Andarine (GTX-007)	2-A3	0150550905	S-inhibitor	C([C@@](COC1C=CC(=CC=1)NC(=O)C)(C)O)(=O)NC2C=C(C(=CC=2)[N+](=O)[O-])C(F)(F)F	401900-40-1	10 mM	441.36	S1140	Androgen Receptor	Andarine (GTX-007) is a selective nonsteroidal androgen receptor (AR) agonist with Ki of 4 nM.
17-DMAG HCl (Alvespimycin)	2-A4	0158618438	S-inhibitor	C1(=C2C(C(=CC1=O)NC(C(=C\C=C/[C@@H]([C@H](/C(=C/[C@@H]([C@H]([C@H](C[C@@H](C2)C)OC)O)C)C)OC(=O)N)OC)/C)=O)=O)NCCN(C)C.Cl	467214-21-7	10 mM	653.21	S1142	HSP (e.g. HSP90)	17-DMAG (Alvespimycin, KOS-1022, NSC 707545) is a potent HSP90 inhibitor with IC50 of 62 nM.
Ivacaftor (VX-770)	2-A5	0150550911	S-inhibitor	C1=C(C(=CC(=C1C(C)(C)C)NC(C2C(C3=C(NC=2)C=CC=C3)=O)=O)O)C(C)(C)C	873054-44-5	10 mM	392.49	S1144	CFTR	Ivacaftor (VX-770, Kalydeco) is a potentiator of CFTR targeting G551D-CFTR and F508del-CFTR with EC50 of 100 nM and 25 nM, respectively.
SNS-032 (BMS-387032)	2-A6	0150550880	S-inhibitor	C1(=CN=C(O1)CSC2=CN=C(S2)NC(=O)C3CCNCC3)C(C)(C)C	345627-80-7	10 mM	380.53	S1145	CDK	SNS-032 is a novel, potent and selective CDK inhibitor of CDK2, CDK7 and CDK9 with IC50 of 38 nM, 62 nM and 4 nM, respectively.
Barasertib (AZD1152-HQPA)	2-A7	0150550938	S-inhibitor	C1(=CC=C2C(=C1)N=CN=C2NC3NN=C(C=3)CC(NC4=CC=CC(=C4)F)=O)OCCCN(CCO)CC	722544-51-6	10 mM	507.56	S1147	Aurora Kinase	AZD1152-HQPA (Barasertib) is a highly selective Aurora B inhibitor with IC50 of 0.37 nM.
Gemcitabine HCl (Gemzar)	2-A8	0150550928	S-inhibitor	C1(N=C(C=CN1[C@@H]2O[C@H]([C@H](C2(F)F)O)CO)N)=O.Cl	122111-03-9	10 mM	299.66	S1149	Autophagy	Gemcitabine Hydrochloride (Gemzar) is a DNA synthesis inhibitor with IC50 of 50 nM, 40 nM, 18 nM and 12 nM in PANC1, MIAPaCa2, BxPC3 and Capan2 cells, respectively.
PLX-4720	2-A9	0150550914	S-inhibitor	C1(=CN=C2C(=C1)C(=CN2)C(=O)C3=C(C(=CC=C3F)NS(=O)(=O)CCC)F)Cl	918505-84-7	10 mM	413.83	S1152	Raf	PLX-4720 is a potent and selective inhibitor of B-RafV600E and c-Raf-1Y340D/Y341D with IC50 of 13 nM and 6.7 nM, respectively.
Roscovitine (Seliciclib, CYC202)	2-A10	0150550868	S-inhibitor	N1=C2C(=C(N=C1N[C@@H](CO)CC)NCC3=CC=CC=C3)N=CN2C(C)C	186692-46-6	10 mM	354.45	S1153	CDK	Roscovitine (Seliciclib, CYC202, R-roscovitine) is a potent and selective CDK inhibitor for Cdc2/cyclin B, CDK2/cyclin A, CDK2/cyclin E and CDK5/p53 with IC50 of 0.65 μM, 0.7 μM, 0.7 μM and 0.16 μM, respectively.
SNS-314 Mesylate	2-A11	0150550934	S-inhibitor	C12(=C(N=CN=C1NCCC3SC(=NC=3)NC(NC4=CC(=CC=C4)Cl)=O)C=CS2).CS(=O)(=O)O	1146618-41-8	10 mM	527.04	S1154	Aurora Kinase	SNS-314 Mesylate is a potent and selective inhibitor of Aurora A, Aurora B and Aurora C with IC50 of 9 nM, 31 nM, and 3.4 nM, respectively.
NSC 74859 (S3I-201)	2-B2	0150550879	S-inhibitor	C1(=CC=C(C=C1)S(OCC(NC2=CC=C(C(=C2)O)C(O)=O)=O)(=O)=O)C	501919-59-1	10 mM	365.36	S1155	STAT	S3I-201 (NSC 74859) is a Stat3 inhibitor with IC50 of 86 μM.
MK-8245	2-B3	0150550927	S-inhibitor	N1N(N=NC=1C2=CC(=NO2)N3CCC(CC3)OC4C(=CC=C(C=4)F)Br)CC(=O)O	1030612-90-8	10 mM	467.25	S1158	Dehydrogenase	MK-8245 is an inhibitor of stearoyl-CoA desaturase (SCD) which targets the liver with IC50 of 1 nM for human SCD1 and 3 nM for both rat SCD1 and mouse SCD1.
Ganetespib (STA-9090)	2-B4	0150550937	S-inhibitor	N1NC(N(C=1C2C(=CC(=C(C=2)C(C)C)O)O)C3=CC4C=CN(C(C=C3)=4)C)=O	888216-25-9	10 mM	364.4	S1159	HSP (e.g. HSP90)	Ganetespib is an HSP90 inhibitor with IC50 of 4 nM in OSA 8 cells.
TRAM-34	2-B5	0150550890	S-inhibitor	N1(N=CC=C1)C(C2C=CC=CC=2)(C3C=CC=CC=3)C4C(=CC=CC=4)Cl	289905-88-0	10 mM	344.84	S1160	Potassium Channel	TRAM-34 is a selective and potent inhibitor of the intermediate-conductance Ca2+-activated K+ channel (IKCa1, KCa3.1) with Kd of 20 nM.
AT13387	2-B6	0150550867	S-inhibitor	C(=O)(N1CC2C=CC(=CC(C1)=2)CN3CCN(CC3)C)C4C(=CC(=C(C=4)C(C)C)O)O	912999-49-6	10 mM	409.52	S1163	HSP (e.g. HSP90)	AT13387 is a selective potent Hsp90 inhibitor with IC50 of 18 nM in A375 cells.
E7080 (Lenvatinib)	2-B7	0150550901	S-inhibitor	C1(=C(C=C2C(=C1)C(=CC=N2)OC3=CC(=C(C=C3)NC(=O)NC4CC4)Cl)OC)C(N)=O	417716-92-8	10 mM	426.85	S1164	VEGFR	E7080 (Lenvatinib) is a multi-target inhibitor of VEGFR2 and VEGFR3 with IC50 of 4 nM and 5.2 nM, respectively.
ABT-751	2-B8	0150550863	S-inhibitor	C1=C(C=CC(=C1)S(=O)(=O)NC2=C(N=CC=C2)NC3=CC=C(C=C3)O)OC	141430-65-1	10 mM	371.41	S1165	Microtubule Associated	ABT-751 (E7010) binds to the colchicine site on β-tubulin and inhibits polymerization of microtubules.
WZ3146	2-B9	0150550874	S-inhibitor	C1(=CC=C(C=C1)NC2=NC=C(C(=N2)OC3=CC(=CC=C3)NC(C=C)=O)Cl)N4CCN(CC4)C	1214265-56-1	10 mM	464.95	S1170	EGFR	WZ3146 is a mutant-selective irreversible inhibitor of EGFR(L858R) and EGFR(E746_A750) with IC50 of 2 nM and 2 nM, respectively.
CYC116	2-B10	0150550864	S-inhibitor	C1(=NC=CC(=N1)C2SC(=NC=2C)N)NC3=CC=C(C=C3)N4CCOCC4	693228-63-6	10 mM	368.46	S1171	Aurora Kinase	CYC116 is a potent inhibitor of Aurora A/B and VEGFR with Ki of 8.0 nM/9.2 nM and 44 nM, respectively.
JNJ 26854165 (Serdemetan)	2-B11	0150550877	S-inhibitor	C1=C2C(=CC=C1)NC=C2CCNC3=CC=C(C=C3)NC4=CC=NC=C4	881202-45-5	10 mM	328.41	S1172	E3 Ligase	JNJ 26854165 (Serdemetan) is an orally bioavailable HDM2 (an E3 ligase) antagonist.
WZ4002	2-C2	0150550862	S-inhibitor	C1(=CC(=C(C=C1)NC2=NC=C(C(=N2)OC3=CC(=CC=C3)NC(C=C)=O)Cl)OC)N4CCN(CC4)C	1213269-23-8	10 mM	494.18	S1173	EGFR	WZ4002 is a novel, mutant-selective EGFR inhibitor for EGFRL858R and EGFRL858R/T790M with IC50 of 2 nM and 8 nM, respectively.
Ostarine (MK-2866)	2-C3	0150550892	S-inhibitor	C([C@@](COC1C=CC(=CC=1)C#N)(C)O)(=O)NC2C=C(C(=CC=2)C#N)C(F)(F)F	841205-47-8	10 mM	389.33	S1174	Androgen Receptor	Ostarine (GTx-024, MK-2866, Enobosarm, S-22) is a selective androgen receptor modulator (SARM) with Ki of 3.8 nM.
BIIB021	2-C4	0150550873	S-inhibitor	N1=C(N=C2C(=C1Cl)N=CN2CC3=C(C(=C(C=N3)C)OC)C)N	848695-25-0	10 mM	318.76	S1175	HSP (e.g. HSP90)	BIIB021 is a novel inhibitor of HSP90 with Ki and EC50 of 1.7 nM and 38 nM, respectivley.
Regorafenib (BAY 73-4506)	2-C5	0150550857	S-inhibitor	C1=NC(=CC(=C1)OC2=CC(=C(C=C2)NC(NC3=CC=C(C(=C3)C(F)(F)F)Cl)=O)F)C(=O)NC	755037-03-7	10 mM	482.82	S1178	c-Kit	Regorafenib (BAY 73-4506, Fluoro-Sorafenib) is a multi-target inhibitor for VEGFR1, VEGFR2, VEGFR3, PDGFRβ, Kit, RET and Raf-1 with IC50 of 13 nM/4.2 nM/46 nM, 22 nM, 7 nM, 1.5 nM and 2.5 nM, respectively.
WZ8040	2-C6	0150550935	S-inhibitor	C1(=CC=C(C=C1)NC2=NC=C(C(=N2)SC3=CC(=CC=C3)NC(C=C)=O)Cl)N4CCN(CC4)C	1214265-57-2	10 mM	481.01	S1179	EGFR	WZ8040 is a novel mutant-selective irreversible EGFRT790M inhibitor.
XAV-939	2-C7	0150550930	S-inhibitor	C1=CC(=CC=C1C(F)(F)F)C2=NC(=C3C(=N2)CCSC3)O	284028-89-3	10 mM	312.31	S1180	Wnt/beta-catenin	XAV-939 is a selective Wnt β-catenin-mediated transcription inhibitor for TNKS1 and TNKS2 with IC50 of 11 nM and 4 nM, respectively.
ENMD-2076	2-C8	0150550899	S-inhibitor	C1(N=C(C=C(N=1)N2CCN(CC2)C)NC3=NNC(=C3)C)/C=C/C4C=CC=CC=4	934353-76-1	10 mM	375.47	S1181	Aurora Kinase	ENMD-2076 is a selective inhibitor of Aurora A and Aurora B with IC50 of 14 nM and 350 nM and also inhibits Flt3, Flt4 and VEGFR2 with IC50 of 1.86 nM/15.9 nM and 58.2 nM, respectively.
Danoprevir	2-C9	0150550855	S-inhibitor	[C@@H]1(CN2[C@@H](C1)C(N[C@@]3(C(NS(=O)(=O)C4CC4)=O)[C@@H](C3)/C=C\CCCCC[C@@H](C2=O)NC(OC(C)(C)C)=O)=O)OC(N5CC6=C(C5)C(=CC=C6)F)=O	850876-88-9	10 mM	731.83	S1183	HCV Protease	Danoprevir is a peptidomimetic inhibitor of the NS3/4A protease of hepatitis C virus (HCV) with IC50 of 0.2-3.5 nM.
BIBR 1532	2-C10	0150550889	S-inhibitor	C1=CC=C2C(=C1)C=C(C=C2)/C(=C/C(NC3=C(C=CC=C3)C(=O)O)=O)C	321674-73-1	10 mM	331.36	S1186	Telomerase	BIBR 1532 is a potent and selective telomerase inhibitor with IC50 of 100 nM.
CUDC-101	2-C11	0150550865	S-inhibitor	C12=C(N=CN=C1NC3=CC(=CC=C3)C#C)C=C(C(=C2)OCCCCCCC(NO)=O)OC	1012054-59-9	10 mM	434.49	S1194	EGFR	CUDC-101 is a potent multi-target inhibitor targeting HDAC, EGFR and HER2 with IC50 of 4.4 nM, 2.4 nM, and 15.7 nM, respectively.
TAK-700 (Orteronel)	2-D2	0150550916	S-inhibitor	C1=C(C=C2C(=C1)C=C(C=C2)C3(C4N(CC3)C=NC=4)O)C(NC)=O	426219-18-3	10 mM	307.35	S1195	P450 (e.g. CYP17)	TAK-700 (Orteronel) is a potent and highly selective rat and human 17,20-lyase inhibitor with IC50 of 54 nM and 38 nM, respectively.
Dimesna	2-D3	0150550866	S-inhibitor	S(CCSSCCS([O-])(=O)=O)([O-])(=O)=O.[Na+].[Na+]	16208-51-8	10 mM	326.34	S1201		Dimesna is an uroprotective agent used to decrease urotoxicity.
Tivozanib (AV-951)	2-D4	0150550941	S-inhibitor	C1(=CC=C(C(=C1)Cl)NC(=O)NC2C=C(ON=2)C)OC3=CC=NC4=C3C=C(C(=C4)OC)OC	475108-18-0	10 mM	454.86	S1207	c-Kit	AV-951 (Tivozanib, KRN-951) is a potent and selective VEGFR inhibitor for VEGFR1/2/3 with IC50 of 0.21 nM/0.16 nM/0.24 nM and also inhibits PDGFR and c-Kit with IC50 of 1.72 nM and 1.63 nM, respectively._x000D_
Bendamustine HCL	2-D5	0150549468	S-inhibitor	C1(=C(C=C2C(=C1)N(C(=N2)CCCC(O)=O)C)N(CCCl)CCCl).Cl	3543-75-7	10 mM	394.72	S1212		Bendamustine HCL (Ribomustin, Treanda, SDX-105) is a DNA-damaging agent with IC50 of 50 μM.
PFI-1	2-D6	0150550853	S-inhibitor	C1(=CC=C2C(=C1)CN(C(N2)=O)C)NS(=O)(=O)C3=C(C=CC=C3)OC	1403764-72-6	10 mM	347.39	S1216	Epigenetic Reader Domain	PFI-1 is a selective BET (bromodomain-containing protein) inhibitor for BRD4 with IC50 of 0.22 μM.
OSI-930	2-D7	0150549418	S-inhibitor	C1=CC=C2C(=C1)C(=CC=N2)CNC3=C(SC=C3)C(NC4=CC=C(C=C4)OC(F)(F)F)=O	728033-96-3	10 mM	443.44	S1220	c-Kit	OSI-930 is a potent inhibitor of Kit, KDR, Flt, CSF-1R, c-Raf and Lck with IC50 of 80 nM, 9 nM, 8 nM, 15 nM, 41 nM and 22 nM, respectively.
Dacarbazine (DTIC-Dome)	2-D8	0150549409	S-inhibitor	C1=NC(=C(N1)/N=N/N(C)C)C(=O)N	4342-03-4	10 mM	182.18	S1221	DNA/RNA Synthesis	Dacarbazine(DTIC-Dome) is an antineoplastic chemotherapy drug used in the treatment of various cancers.
Ku-0063794	2-D9	0150549433	S-inhibitor	N1=C(N=C2C(=C1N3CCOCC3)C=CC(=N2)C4=CC(=C(C=C4)OC)CO)N5C[C@H](O[C@H](C5)C)C	938440-64-3	10 mM	465.54	S1226	mTOR	KU-0063794 is a potent and highly specific mTOR inhibitor for both mTORC1 and mTORC2 with IC50 ~10 nM.
Agomelatine	2-D10	0150549434	S-inhibitor	C(C)(=O)NCCC1C=CC=C2C=CC(=CC=12)OC	138112-76-2	10 mM	243.3	S1243	5-HT Receptor	Agomelatine is classified as a norepinephrine-dopamine disinhibitor (NDDI) due to its antagonism of the 5-HT2C receptor.
MDV3100 (Enzalutamide)	2-D11	0150549435	S-inhibitor	C1(=C(C=CC(=C1)N2C(N(C(C2(C)C)=O)C3=CC=C(C(=C3)C(F)(F)F)C#N)=S)C(NC)=O)F	915087-33-1	10 mM	464.44	S1250	Androgen Receptor	MDV3100 is an androgen-receptor (AR) antagonist with IC50 of 36 nM.
Dienogest	2-E2	0150549436	S-inhibitor	C1(CCC2=C3CC[C@]4([C@](CC[C@@]([C@](CCC(=C1)2)3[H])4[H])(O)CC#N)C)=O	65928-58-7	10 mM	311.42	S1251	Estrogen/progestogen Receptor	Dienogest is an orally active synthetic progesterone (or progestin).
Rufinamide (Banzel)	2-E3	0150549414	S-inhibitor	C1=CC=C(C(=C1F)CN2N=NC(=C2)C(=O)N)F	106308-44-5	10 mM	238.19	S1256	Sodium Channel	Rufinamide, a triazole derivative, is an anticonvulsant medication.
Posaconazole	2-E4	0150549425	S-inhibitor	C1(=CC=C(C=C1)N2CCN(CC2)C3=CC=C(C=C3)OC[C@@H]4CO[C@](C4)(C5=CC=C(C=C5F)F)CN6N=CN=C6)N7C(N(N=C7)[C@H]([C@H](C)O)CC)=O	171228-49-2	10 mM	700.78	S1257		Posaconazole (Noxafil) is a sterol C14ɑ demethylase inhibitor with an IC50 of 0.25 nM.
BMS-708163 (Avagacestat)	2-E6	0150549453	S-inhibitor	C1(=C(C=C(C=C1)C2N=CON=2)F)CN([C@@H](C(N)=O)CCC(F)(F)F)S(C3=CC=C(C=C3)Cl)(=O)=O	1146699-66-2	10 mM	520.88	S1262	Beta Amyloid	BMS-708163 is a potent, selective γ-secretase inhibitor of Aβ40 and Aβ42 with IC50 of 0.3 nM and 0.27 nM, respectively.
PD173074	2-E7	0150549412	S-inhibitor	N1=C(N=C2C(=C1)C=C(C(=N2)NC(NC(C)(C)C)=O)C3=CC(=CC(=C3)OC)OC)NCCCCN(CC)CC	219580-11-7	10 mM	523.67	S1264	FGFR	PD173074 is a potent FGFR1 inhibitor with IC50 of ~25 nM and also inhibits VEGFR2 with IC50 of 100-200 nM.
WYE-354	2-E8	0150549421	S-inhibitor	C1=C(C=CC(=C1)C2=NC3=C(C(=N2)N4CCOCC4)C=NN3C5CCN(CC5)C(=O)OC)NC(OC)=O	1062169-56-5	10 mM	495.53	S1266	mTOR	WYE-354 is a potent, specific and ATP-competitive inhibitor of mTOR with IC50 of 5 nM.
Vemurafenib (PLX4032)	2-E9	0150549462	S-inhibitor	C1(=CN=C2C(=C1)C(=CN2)C(=O)C3=C(C(=CC=C3F)NS(=O)(=O)CCC)F)C4=CC=C(C=C4)Cl	918504-65-1	10 mM	489.92	S1267	Raf	PLX4032 (Vemurafenib, RG7204, Zelboraf, RO5185426) is a novel and potent inhibitor of B-RafV600E with IC50 of 31 nM.
IC-87114	2-E10	0150549419	S-inhibitor	C12=C(N=C(N(C1=O)C3=C(C=CC=C3)C)CN4C=NC5=C4N=CN=C5N)C=CC=C2C	371242-69-2	10 mM	397.43	S1268	PI3K	IC-87114 is a selective inhibitor of PI3Kδ with IC50 of 0.5 μM.
BX-795	2-E11	0150549422	S-inhibitor	N1(CCCC1)C(=O)NC2C=C(C=CC=2)NC3N=C(C(=CN=3)I)NCCCNC(C4=CC=CS4)=O	702675-74-9	10 mM	591.47	S1274	IκB/IKK	BX795 is a potent and specific TBK1, IKKε and PDK-1 inhibitor with IC50 of 6 nM, 41 nM and 111 nM, respectively.
BX-912	2-F2	0150549439	S-inhibitor	N1(CCCC1)C(=O)NC2C=C(C=CC=2)NC3N=C(C(=CN=3)Br)NCCC4=CN=CN4	702674-56-4	10 mM	471.35	S1275	PDK-1	BX912 is a selective potent PDK1 inhibitor with IC50 of 12 nM.
Epothilone A	2-F3	0150549482	S-inhibitor	O1[C@@H]2CCC[C@@H]([C@@H]([C@H](C(C([C@@H](CC(O[C@H](C[C@H]12)/C(C)=C/C3N=C(SC=3)C)=O)O)(C)C)=O)C)O)C	152044-53-6	10 mM	493.66	S1297	Microtubule Associated	Epothilone A is a Taxol-like microtubule-stabilizing agent with EC0.01 of 2 μM.
Ki16425	2-F4	0150549498	S-inhibitor	C1=CC=CC(=C1Cl)C(C)OC(=O)NC2C(=NOC=2C3=CC=C(C=C3)CSCCC(O)=O)C	355025-24-0	10 mM	474.96	S1315	LPA Receptor	Ki16425 is a competitive, potent and reversible antagonist to LPA1, LPA2 and LPA3 with Ki of 0.34 μM, 6.5 μM and 0.93 μM, respectively.
AMG-208	2-F5	0150549463	S-inhibitor	C1(=CC=C2C(=C1)N=CC=C2OCC3N4C(=NN=3)C=CC(=N4)C5=CC=CC=C5)OC	1002304-34-8	10 mM	383.4	S1316	c-Met	AMG-208 is a highly selective c-Met inhibitor with IC50 of 9.3 nM.
Gabapentin HCl	2-F6	0150549503	S-inhibitor	C1(CCCC(C1)(CC(O)=O)CN).Cl	60142-95-2	10 mM	207.7	S1338	GABA Receptor	Gabapentin Hydrochloride is a GABA analogue.
TG100-115	2-F7	0150549493	S-inhibitor	C1(=C(N=C2C(=N1)C(=NC(=N2)N)N)C3=CC=CC(=C3)O)C4=CC(=CC=C4)O	677297-51-7	10 mM	346.34	S1352	PI3K	TG100-115 is a potent and dual selective inhibitor for PI3Kγ and PI3Kδ with IC50 of 83 nM and 235 nM, respectively.
GSK1059615	2-F8	0150549444	S-inhibitor	C1(=CC=C2C(=C1)C(=CC=N2)C3=CC=NC=C3)/C=C4/C(NC(S4)=O)=O	958852-01-2	10 mM	333.36	S1360	mTOR	GSK1059615 is a novel and dual inhibitor of PI3Kα, PI3Kβ, PI3Kδ, PI3Kγ and mTOR with IC50 of 0.4 nM, 0.6 nM, 2 nM, 5 nM and 12 nM, respectively.
MGCD-265	2-F9	0150549467	S-inhibitor	C1(=CC=CC=C1)CC(NC(NC2=CC=C(C(=C2)F)OC3=C4C(=NC=C3)C=C(S4)C5N=CN(C=5)C)=S)=O	875337-44-3	10 mM	517.6	S1361	c-Met	MGCD-265 is a potent, multi-target and ATP-competitive inhibitor of c-Met, VEGFR1, VEGFR2, VEGFR3, Ron, and Tie2 with IC50 of 1 nM, 3 nM, 3 nM, 4 nM, 2 nM and 7 nM, respectively.
Rigosertib (ON-01910)	2-F10	0150549491	S-inhibitor	C1(=C(C=C(C=C1OC)OC)OC)/C=C/S(CC2=CC=C(C(=C2)NCC([O-])=O)OC)(=O)=O.[Na+]	1225497-78-8	10 mM	473.47	S1362	PLK	Rigosertib (Estybon, Novonex, ON-01910) is a non-ATP-competitive inhibitor of PLK1 (Polo-like kinase 1) with IC50 of 9 nM.
Ki8751	2-F11	0150549495	S-inhibitor	C1=CN=C2C(=C1OC3=CC=C(C(=C3)F)NC(NC4=CC=C(C=C4F)F)=O)C=C(C(=C2)OC)OC	228559-41-9	10 mM	469.41	S1363	c-Kit	Ki8751 is a potent and selective inhibitor of VEGFR2, PDGFRα and c-Kit with IC50 of 0.9 nM, 67 nM and 40 nM, respectively.
Epothilone B (EPO906)	2-G2	0150549465	S-inhibitor	O1[C@@]2(CCC[C@@H]([C@@H]([C@H](C(C([C@@H](CC(O[C@H](C[C@H]12)/C(C)=C/C3N=C(SC=3)C)=O)O)(C)C)=O)C)O)C)C	152044-54-7	10 mM	507.68	S1364	Microtubule Associated	Epothilone B is a Taxol-like microtubule-stabilizing agent with EC0.01 of 1.8 μM.
BMS-707035	2-G3	0150549420	S-inhibitor	C1(=CC=C(C=C1)CNC(C2N=C(N(C(C=2O)=O)C)N3S(CCCC3)(=O)=O)=O)F	729607-74-3	10 mM	410.42	S1366	Integrase	BMS-707035 is a specific HIV-I integrase (IN) inhibitor with IC50 of 15 nM.
Amonafide	2-G4	0150549477	S-inhibitor	C12C=C(C=C3C1=C(C=CC=2)C(N(C3=O)CCN(C)C)=O)N	69408-81-7	10 mM	283.33	S1367	Topoisomerase	Amonafide (NSC-308847) is a selective topoisomerase II inhibitor.
Gestodene	2-G5	0150549488	S-inhibitor	C1C(C=C2[C@](C1)([C@]3([C@@](CC2)([C@]4([C@](CC3)([C@@](C=C4)(O)C#C)CC)[H])[H])[H])[H])=O	60282-87-3	10 mM	310.43	S1376	Estrogen/progestogen Receptor	Gestodene is a progestogen hormonal contraceptive.
Ruxolitinib (INCB018424)	2-G6	0150550940	S-inhibitor	N1=CN=C2C(=C1C3=CN(N=C3)[C@@H](CC#N)C4CCCC4)C=CN2	941678-49-5	10 mM	306.37	S1378	JAK	INCB018424 is a JAK family inhibitor for JAK1, JAK2 and JAK3 with IC50 of 2.7 nM, 4.5 nM and 322 nM, respectively.
Lopinavir (ABT-378)	2-G7	0150550922	S-inhibitor	C1=CC=C(C(=C1C)OCC(N[C@@H](CC2=CC=CC=C2)[C@H](C[C@H](CC3=CC=CC=C3)NC(=O)[C@@H](N4CCCNC4=O)C(C)C)O)=O)C	192725-17-0	10 mM	628.8	S1380	HIV Protease	Lopinavir (ABT-378) is a potent HIV protease inhibitor with Ki of 1.3 pM.
Pelitinib (EKB-569)	2-G8	0150550919	S-inhibitor	C1(=C(C=C2C(=C1)N=CC(=C2NC3=CC(=C(C=C3)F)Cl)C#N)NC(/C=C/CN(C)C)=O)OCC	257933-82-7	10 mM	467.92	S1392	EGFR	Pelitinib (EKB-569) is a potent EGFR inhibitor with IC50 of 38.5 nM.
Tenofovir Disoproxil Fumarate	2-G9	0150549407	S-inhibitor	N1(C=NC2=C(C=1N)N=CN2C[C@H](OCP(OCOC(OC(C)C)=O)(OCOC(=O)OC(C)C)=O)C).C(=C/C(=O)O)/C(=O)O	202138-50-9	10 mM	635.51	S1400	Reverse Transcriptase	Tenofovir disoproxil fumarate belongs to nucleotide analogue reverse transcriptase inhibitors (nRTIs).
Tenofovir (Viread)	2-G10	0150550917	S-inhibitor	N1=CN=C2C(=C1N)N=CN2C[C@H](OCP(=O)(O)O)C	147127-20-6	10 mM	287.21	S1401	Reverse Transcriptase	Tenofovir blocks reverse transcriptase and hepatitis B virus infections.
Clopidogrel (Plavix)	2-G11	0150549358	S-inhibitor	C1(=CC=CC(=C1Cl)[C@H](N2CCC3=C(C2)C=CS3)C(=O)OC).OS(O)(=O)=O	120202-66-6	10 mM	419.9	S1415	P2 Receptor	Clopidogrel (Plavix) is an oral, thienopyridine class antiplatelet agent.
Droxinostat	2-H2	0150549405	S-inhibitor	C1=C(C=C(C(=C1)OCCCC(NO)=O)C)Cl	99873-43-5	10 mM	243.69	S1422	HDAC	Droxinostat (CMH, 5809354) is a selective inhibitor of HDAC3, HDAC6 and HDAC8 with IC50 of 16.9 μM, 2.47μM and 1.46 μM, respectively.
Varenicline tartrate	2-H3	0150549312	S-inhibitor	C([C@@H]([C@H](C(O)=O)O)O)(O)=O.C12C3=C(C(C1)CNC2)C=C4C(=C3)N=CC=N4	375815-87-5	10 mM	361.35	S1440	AChR	Varenicline is a prescription medication used to treat smoking addiction.
Aurora A Inhibitor I	2-H4	0150549388	S-inhibitor	N1=CC(=C(N=C1NC2=CC=C(C=C2)CC(N3CCN(CC3)CC)=O)NC4=CC=C(C=C4)C(NC5=CC=CC=C5Cl)=O)F	1158838-45-9	10 mM	588.07	S1451	Aurora Kinase	Aurora A Inhibitor I is a novel, potent, and selective inhibitor of Aurora A with IC50 of 3.4 nM.
Ispinesib (SB-715992)	2-H5	0150549379	S-inhibitor	C1=CC(=CC=C1)CN2C(C3=C(N=C2[C@H](N(CCCN)C(C4=CC=C(C=C4)C)=O)C(C)C)C=C(C=C3)Cl)=O	336113-53-2	10 mM	517.06	S1452	Kinesin	Ispinesib (SB-715992, CK0238273) is a potent, specific and reversible inhibitor of KSP (HsEg5) with Ki of 1.7 nM.
Tipifarnib (Zarnestra)	2-H6	0150549378	S-inhibitor	C1=CC(=CC=C1[C@](C2=CN=CN2C)(C3=CC4=C(C=C3)N(C(C=C4C5=CC(=CC=C5)Cl)=O)C)N)Cl	192185-72-1	10 mM	489.4	S1453	Transferase	Tipifarnib (Zarnestra, R115777) is a potent and specific farnesyltransferase (FTase) inhibitor with IC50 of 0.6 nM.
PHA-680632	2-H7	0150549402	S-inhibitor	C1(=CC=C(C=C1)C(=O)NC2C3=C(NN=2)CN(C3)C(=O)NC4=C(C=CC=C4CC)CC)N5CCN(CC5)C	398493-79-3	10 mM	501.62	S1454	Aurora Kinase	PHA-680632 is potent inhibitor of Aurora A, Aurora B and Aurora C with IC50 of 27 nM, 135 nM and 120 nM, repectively.
Cilomilast (SB-207499)	2-H8	0150549356	S-inhibitor	C1(=C(C=CC(=C1)C2(CCC(CC2)(C(=O)O)[H])C#N)OC)OC3CCCC3	153259-65-5	10 mM	343.42	S1455	PDE	Cilomilast (SB-207499) is a potent LPDE4 and HPDE4 inhibitor with IC50 of 100 nM and 120 nM, respectively.
Zibotentan (ZD4054)	2-H9	0150549338	S-inhibitor	C1(C(=CC=CN=1)S(=O)(=O)NC2C(=NC(=CN=2)C)OC)C3C=CC(=CC=3)C4OC=NN=4	186497-07-4	10 mM	424.43	S1456	Endothelin Receptor	Zibotentan (ZD4054) is a specific Endothelin A (ETA) antagonist with IC50 of 21 nM.
Atazanavir sulfate	2-H10	0150549389	S-inhibitor	O(C(N[C@H](C(N[C@H]([C@H](CN(NC([C@@H](NC(OC)=O)C(C)(C)C)=O)CC1=CC=C(C=C1)C2=NC=CC=C2)O)CC3=CC=CC=C3)=O)C(C)(C)C)=O)C.S(=O)(=O)(O)O	229975-97-7	10 mM	802.93	S1457	HIV Protease	Atazanavir is a HIV protease inhibitor with Ki of 2.66 nM.
Thiazovivin	2-H11	0150549390	S-inhibitor	C1(SC=C(N=1)C(NCC2=CC=CC=C2)=O)NC3=CC=NC=N3	1226056-71-8	10 mM	311.36	S1459	ROCK	Thiazovivin (Tzv) is a novel ROCK inhibitor with IC50 of ~0.5 μM.
TSU-68 (SU6668)	3-A2	0150549353	S-inhibitor	C1=CC=C2C(=C1)/C(C(N2)=O)=C/C3NC(=C(C=3C)CCC(O)=O)C	252916-29-3	10 mM	310.35	S1470	FGFR	TSU-68 (SU6668, Orantinib) is a potent inhibitor of Flk-1/KDR, FGFR1 and PDGFRβ with Ki of 2.1 μM, 1.2 μM, and 8 nM, respectively.
Safinamide Mesylate (FCE28073)	3-A3	0150549364	S-inhibitor	C1(=CC=CC(=C1)COC2=CC=C(C=C2)CN[C@H](C(N)=O)C)F.CS(=O)(=O)O	202825-46-5	10 mM	398.45	S1472	MAO	Safinamide Mesylate is mesylate salt of Safinamide, which selectively and reversibly inhibits MAO-B with IC50 of 0.45 μM.
GSK429286A	3-A4	0150549365	S-inhibitor	C1(CC(C(=C(N1)C)C(NC2=C(C=C3C(=C2)C=NN3)F)=O)C4=CC=C(C=C4)C(F)(F)F)=O	864082-47-3	10 mM	432.37	S1474	ROCK	GSK429286A is a selective inhibitor of ROCK1 and ROCK2 with IC50 of 14 nM and 63 nM, respectively.
AS703026 (pimasertib)	3-A5	0150550921	S-inhibitor	C1=C(C=CC(=C1F)NC2=CN=CC=C2C(NC[C@@H](CO)O)=O)I	1236699-92-5	10 mM	431.2	S1475	MEK	AS703026 is a highly selective and potent non-competitive inhibitor of MEK1/2 with IC50 of 5-11 nM.
VX-222	3-A6	0150549354	S-inhibitor	[C@H]1(CC[C@@H](CC1)O)N(C2=C(SC(=C2)C#CC(C)(C)C)C(O)=O)C(=O)[C@@H]3CC[C@H](CC3)C	1026785-55-6	10 mM	445.61	S1480	HCV Protease	VX-222 (VCH-222) is a novel, potent and selective inhibitor of HCV polymerase with IC50 of 0.94-1.2 μM.
LY335979 (Zosuquidar 3HCl)	3-A7	0150549340	S-inhibitor	C12(=C(C=CC=C1OC[C@@H](CN3CCN(CC3)[C@@H]4C5=C([C@@H]6[C@H](C7=C4C=CC=C7)C(F)(F)6)C=CC=C5)O)N=CC=C2).Cl.Cl.Cl	167465-36-3	10 mM	636.99	S1481	P-gp	LY335979 (Zosuquidar) is a potent modulator of P-glycoprotein-mediated multidrug resistance with Ki of 60 nM.
Daclatasvir （BMS-790052）	3-A8	0150549375	S-inhibitor	C1=CC(=CC=C1C2=CN=C(N2)[C@H]3N(CCC3)C([C@H](C(C)C)NC(OC)=O)=O)C4=CC=C(C=C4)C5=CN=C(N5)[C@H]6N(CCC6)C([C@H](C(C)C)NC(OC)=O)=O	1009119-64-5	10 mM	738.88	S1482	HCV Protease	BMS-790052 is a highly selective inhibitor of HCV NS5A with EC50 of 9-50 pM.
MC1568	3-A9	0150549367	S-inhibitor	C1=CC(=CC(=C1)C(/C=C/C2=CN(C(=C2)/C=C/C(NO)=O)C)=O)F	852475-26-4	10 mM	314.31	S1484	HDAC	MC1568 is a selective HDAC inhibitor with IC50 of 220 nM.
HMN-214	3-A10	0150549391	S-inhibitor	C1=CC=CC(=C1N(S(C2=CC=C(C=C2)OC)(=O)=O)C(C)=O)/C=C/C3=CC=[N+](C=C3)[O-]	173529-46-9	10 mM	424.47	S1485	PLK	HMN-214 (IVX-214) is a potent inhibitor of Polo-like kinase (Plk)1 with IC50 of 118 nM.
AEE788 (NVP-AEE788)	3-A11	0150549368	S-inhibitor	C1=NC(=C2C(=N1)NC(=C2)C3=CC=C(C=C3)CN4CCN(CC4)CC)N[C@@H](C5=CC=CC=C5)C	497839-62-0	10 mM	440.58	S1486	EGFR	AEE788 is a potent inhibitor of EGFR and HER2/ErbB2 with IC50 of 2 nM and 6 nM and also inhibits VEGFR2 and Flt with IC50 of 77 nM and 59 nM, respectively.
PHA-793887	3-B2	0150549371	S-inhibitor	N1N=C(C2=C1C(N(C2)C(C3CCN(CC3)C)=O)(C)C)NC(CC(C)C)=O	718630-59-2	10 mM	361.48	S1487	CDK	PHA-793887 is a novel and potent inhibitor of CDK2, CDK5 and CDK7 with IC50 of 8 nM, 5 nM and 10 nM, respectively.
Naratriptan HCl	3-B3	0150549374	S-inhibitor	C1(=CC=C2C(=C1)C(=CN2)C3CCN(CC3)C)CCS(=O)(=O)NC.Cl	143388-64-1	10 mM	371.93	S1488	5-HT Receptor	Naratriptan (Amerge) is a triptan agent that is used for the treatment of migraine headaches.
PIK-93	3-B4	0150549348	S-inhibitor	C1(=C(C=C(C=C1)C2SC(=NC=2C)NC(C)=O)S(=O)(=O)NCCO)Cl	593960-11-3	10 mM	389.88	S1489	PI3K	PIK-93 is a novel and potent inhibitor of PI3Kγ and PI4KIIIβ with IC50 of 16 nM and 19 nM, respectively.
Ponatinib (AP24534)	3-B5	0150549400	S-inhibitor	C1C=NN2C(C=1)=NC=C2C#CC3=C(C=CC(=C3)C(=O)NC4=CC(=C(C=C4)CN5CCN(CC5)C)C(F)(F)F)C	943319-70-8	10 mM	532.56	S1490	Bcr-Abl	AP24534 is a novel, potent multi-target inhibitor of Abl, PDGFRα, VEGFR2, FGFR1 and Src with IC50 of 0.37 nM, 1.1 nM, 1.5 nM, 2.2 nM and 5.4 nM, respectively.
LY2228820	3-B6	0150549333	S-inhibitor	CC(C1=NC(=C(N1)C2=NC3=C(C=C2)N=C(N3CC(C)(C)C)N)C4=CC=C(C=C4)F)(C)C.CS(=O)(=O)O.CS(=O)(=O)O	862507-23-1	10 mM	612.74	S1494	p38 MAPK	LY2228820 is a novel and potent inhibitor of p38 MAPK with IC50 of 7 nM.
Pralatrexate (Folotyn)	3-B7	0150549366	S-inhibitor	N1=C(N=C2C(=C1N)N=C(C=N2)CC(C3=CC=C(C=C3)C(N[C@@H](CCC(O)=O)C(=O)O)=O)CC#C)N	146464-95-1	10 mM	477.47	S1497	DHFR	Pralatrexate(Folotyn) is an antifolate, and structurally a folate analog. Its IC50 is < 300 nM in some cell lines.
NVP-BEP800	3-B8	0150549370	S-inhibitor	C1=C(C(=CC(=C1Cl)OCCN2CCCC2)C3=NC(=NC4=C3C=C(S4)C(NCC)=O)N)Cl	847559-80-2	10 mM	480.41	S1498	HSP (e.g. HSP90)	NVP-BEP800 is a novel, fully synthetic HSP90β inhibitor with IC50 of 58 nM.
SB939 (Pracinostat)	3-B9	0150549342	S-inhibitor	C1(=CC=C2C(=C1)N=C(N2CCN(CC)CC)CCCC)/C=C/C(NO)=O	929016-96-6	10 mM	358.48	S1515	HDAC	SB939 is a potent HDAC inhibitor with IC50 of 40-140 nM.
Ibuprofen Lysine (NeoProfen)	3-B10	0150549346	S-inhibitor	C1(=CC=C(C=C1)C(C(O)=O)C)CC(C)C.C([C@H](CCCCN)N)(O)=O	57469-77-9	10 mM	352.47	S1518	COX	Ibuprofen Lysine(Motrin) is a non-steroidal anti-inflammatory drug.
CCT129202	3-B11	0150549393	S-inhibitor	C1(=CN=C2C(=C1N3CCN(CC3)CC(NC4SC=CN=4)=O)N=C(N2)C5=CC=C(C=C5)N(C)C)Cl	942947-93-5	10 mM	497.02	S1519	Aurora Kinase	CCT129202 is an ATP-competitive pan-Aurora inhibitor for Aurora A, Aurora B and Aurora C with IC50 of 0.042 μM, 0.198 μM and 0.227 μM, respectively.
Tosedostat (CHR2797)	3-C2	0150549330	S-inhibitor	[C@@H]([C@@H](C(=O)NO)O)(C(=O)N[C@H](C(OC1CCCC1)=O)C2=CC=CC=C2)CC(C)C	238750-77-1	10 mM	406.47	S1522	Aminopeptidase	CHR-2797 is an aminopeptidase inhibitor for LAP, PuSA and Aminopeptidase N with IC50 of 100 nM, 150 nM and 220 nM, respectively.
XL765 (SAR245409)	3-C3	0150549397	S-inhibitor	C12=CC=CC=C1N=C(C(=N2)NC3=CC(=CC(=C3)OC)OC)NS(C4=CC=C(C=C4)NC(=O)C5=CC=C(C(=C5)OC)C)(=O)=O	1349796-36-6	10 mM	599.66	S1523	mTOR	XL765 is a dual inhibitor of mTOR/PI3k for mTOR, p110α, p110β, p110γ and p110δ with IC50 of 157 nM, 39 nM, 113 nM, 9 nM and 43 nM, respectively.
AT7519	3-C4	0150549398	S-inhibitor	C1=C(C(=C(C=C1)Cl)C(NC2=CNN=C2C(=O)NC3CCNCC3)=O)Cl	844442-38-2	10 mM	382.24	S1524	CDK	AT7519 is a novel multi-CDK inhibitor for CDK1/cyclin B, CDK2/Cyclin A, CDK3/Cyclin E, CDK4/Cyclin D1, CDK5/p35 and CDK6/Cyclin D3 with IC50 of 210 nM, 47 nM, 360 nM, 100 nM, 13 nM and 170 nM, respectively.
MK-1775	3-C5	0150549315	S-inhibitor	C1=CC(=NC(=C1)C(O)(C)C)N2N(C(C3=C2N=C(N=C3)NC4=CC=C(C=C4)N5CCN(CC5)C)=O)CC=C	955365-80-7	10 mM	500.6	S1525	Wee1	MK-1775 is a potent and selective Wee1 inhibitor with IC50 of 5.2 nM.
LY2811376	3-C6	0150549327	S-inhibitor	C1=NC=C(C=N1)C2=C(C=C(C(=C2)[C@]3(N=C(SCC3)N)C)F)F	1194044-20-6	10 mM	320.36	S1528	Beta Amyloid	LY2811376 is a non-peptidic BACE1 inhibitor with IC50 of 239 nM/249 nM and also decreases the Aβ secretion with EC50 of ~300 nM.
Hesperadin	3-C7	0150549350	S-inhibitor	C1(=CC=C2C(=C1)/C(C(N2)=O)=C(\C3=CC=CC=C3)NC4=CC=C(C=C4)CN5CCCCC5)NS(CC)(=O)=O	422513-13-1	10 mM	516.65	S1529	Aurora Kinase	Hesperadin inhibits Aurora B and T. brucei Aurora kinase-1 (TbAUK1) with IC50 of 250 nM and 40 nM, respectively.
BIX 02188	3-C8	0150549321	S-inhibitor	C1=C(C=C2C(=C1)/C(C(N2)=O)=C(/NC3=CC(=CC=C3)CN(C)C)C4=CC=CC=C4)C(NC)=O	1094614-84-2	10 mM	426.51	S1530	MEK	BIX02188 is a selective inhibitor of MEK5 with IC50 of 4.3 nM.
BIX 02189	3-C9	0150549394	S-inhibitor	C1=C(C=C2C(=C1)/C(C(N2)=O)=C(/NC3=CC(=CC=C3)CN(C)C)C4=CC=CC=C4)C(N(C)C)=O	1094614-85-3	10 mM	440.54	S1531	MEK	BIX02189 is a selective inhibitor of MEK5 with IC50 of 1.5 nM.
R406 (free base)	3-C10	0150549373	S-inhibitor	C1(=C(C=C(C=C1OC)NC2=NC(=C(C=N2)F)NC3=NC4=C(C=C3)OC(C(N4)=O)(C)C)OC)OC	841290-80-0	10 mM	470.45	S1533	Syk	R406 (free base) is a Syk inhibitor with IC50 of 41 nM.
CP 673451	3-C11	0150549316	S-inhibitor	C1=CC(=C2C(=C1)C=CC(=N2)N3C4=CC=C(C=C4N=C3)OCCOC)N5CCC(CC5)N	343787-29-1	10 mM	417.5	S1536	PDGFR	CP 673451 is a potent PDGFR-β inhibitor with an IC50 of 1 nM.
DMXAA (ASA404)	3-D2	0158617910	S-inhibitor	C12=C(C(=CC=C1)CC(O)=O)OC3=C(C2=O)C=CC(=C3C)C	117570-53-3	10 mM	282.29	S1537	VDA	DMXAA (ASA404) is a vascular disrupting agents (VDA) and competitive inhibitor of DT-diaphorase with Ki of 20 μM and IC50 of 62.5 μM, respectively.
Telaprevir (VX-950)	3-D3	0158617918	S-inhibitor	[C@@]12([C@](CN([C@H]1C(=O)N[C@@H](CCC)C(=O)C(=O)NC3CC3)C(=O)[C@H](C(C)(C)C)NC(=O)[C@@H](NC(=O)C4=NC=CN=C4)C5CCCCC5)(CCC2)[H])[H]	402957-28-2	10 mM	679.85	S1538	HCV Protease	Telaprevir (VX-950) is an HCV NS3-4A serine protease inhibitor with IC50 of 0.35 μM.
Saxagliptin (BMS-477118,Onglyza)	3-D4	0158617896	S-inhibitor	C1C2CC3(CC1CC(C2)(O)C3)[C@@H](C(N4[C@@H](C[C@]5([C@]4(C5)[H])[H])C#N)=O)N	361442-04-8	10 mM	315.41	S1540	DPP-4	Saxagliptin (BMS-477118, Onglyza) is a selective and reversible DPP4 inhibitor with IC50 of 26 nM.
AM-1241	3-D5	0141006916	S-inhibitor	C1=CC2=C(C=C1)N(C=C2C(C3=CC(=CC=C3I)[N+](=O)[O-])=O)CC4N(CCCC4)C	444912-48-5	10 mM	503.33	S1544	Cannabinoid Receptor	AM-1241 is a selective CB2 agonist with Ki of 3.4 nM.
SB-408124	3-D6	0158617898	S-inhibitor	C1=C(C=C2C(=C1F)N=C(C=C2NC(NC3=CC=C(C=C3)N(C)C)=O)C)F	288150-92-5	10 mM	356.37	S1545	OX Receptor	SB-408124 (Tocris-1963) is a non-peptide antagonist for OX1 with Ki of 57 nM and 27 nM in both whole cell and membrane, respectively.
Dapagliflozin	3-D7	0158617893	S-inhibitor	C1(=CC=C(C(=C1)CC2=CC=C(C=C2)OCC)Cl)[C@@H]3O[C@@H]([C@H]([C@@H]([C@@H]3O)O)O)CO	461432-26-8	10 mM	408.87	S1548	SGLT	Dapagliflozin is a potent and selective hSGLT2 inhibitor with EC50 of 1.1 nM.
Nebivolol (Bystolic)	3-D8	0158617894	S-inhibitor	C1(=C(C=C2C(=C1)O[C@](CC2)([C@@H](CNC[C@H]([C@@]3(CCC4=C(O3)C=CC(=C4)F)[H])O)O)[H])F).Cl	152520-56-4	10 mM	441.9	S1549	Adrenergic Receptor	Nebivolol selectively inhibits β1-adrenoceptor with IC50 of 0.8 nM.
AZD8055	3-D9	0158617873	S-inhibitor	C1(=C(C=CC(=C1)C2=NC3=C(C=C2)C(=NC(=N3)N4[C@H](COCC4)C)N5[C@H](COCC5)C)OC)CO	1009298-09-2	10 mM	465.54	S1555	mTOR	AZD8055 is a novel ATP-competitive inhibitor of mTOR with IC50 of 0.8 nM.
PHT-427	3-D10	0158617872	S-inhibitor	C1=C(C=CC(=C1)S(=O)(NC2=NN=CS2)=O)CCCCCCCCCCCC	1191951-57-1	10 mM	409.61	S1556	Akt	PHT-427 is a dual Akt and PDPK1 inhibitor with Ki of 2.7 μM and 5.2 μM, respectively.
KRN 633	3-D11	0158617870	S-inhibitor	C1(=C(C=C2C(=C1)C(=NC=N2)OC3=CC=C(C(=C3)Cl)NC(=O)NCCC)OC)OC	286370-15-8	10 mM	416.86	S1557	PDGFR	KRN 633 is an ATP-competitive inhibitor of VEGFR1/2/3 with IC50 of 170 nM/160 nM/125 nM and also inhibits PDGFRα/β with IC50 of 965 nM/9850 nM.
AT7867	3-E2	0158617874	S-inhibitor	C1(=CC=C(C=C1)C2(C3=CC=C(C=C3)C4=CNN=C4)CCNCC2)Cl	857531-00-1	10 mM	337.85	S1558	Akt	AT7867 is a potent ATP-competitive inhibitor of Akt1/2/3 and S6K with IC50 of 32 nM/17 n/47 nM and 85 nM, respectively.
BMS 777607	3-E3	0158617869	S-inhibitor	C1(=C(N=CC=C1OC2=CC=C(C=C2F)NC(=O)C3C(N(C=CC=3OCC)C4=CC=C(C=C4)F)=O)N)Cl	1025720-94-8	10 mM	512.89	S1561	Axl	BMS-777607 is a Met-related inhibitor for c-Met, Axl, Ron and Tyro3 with IC50 of 3.9 nM, 1.1 nM, 1.8 nM and 4.3 nM, respectively.
VX-809	3-E4	0158617917	S-inhibitor	C12=C(C=C(C=C1)C3(C(NC4=NC(=C(C=C4)C)C5=CC=CC(=C5)C(O)=O)=O)CC3)OC(O2)(F)F	936727-05-8	10 mM	452.41	S1565	CFTR	VX-809 is a CFTR modulator with EC50 of 0.1 μM.
Pomalidomide	3-E5	0158617847	S-inhibitor	C1=CC=C2C(=C1N)C(N(C2=O)C3C(NC(CC3)=O)=O)=O	19171-19-8	10 mM	273.24	S1567	TNF-alpha	Pomalidomide inhibits LPS-induced TNF-α release with IC50 of 13 nM.
PD318088	3-E6	0158617848	S-inhibitor	C1=C(C(=C(C(=C1C(NOCC(CO)O)=O)NC2=CC=C(C=C2F)I)F)F)Br	391210-00-7	10 mM	561.09	S1568	MEK	PD318088 is a non-ATP competitive allosteric MEK1/2 inhibitor.
KU-60019	3-E7	0158617892	S-inhibitor	C1=C(C=CC2=C1CC3=C(S2)C(=CC=C3)C4=CC(C=C(O4)N5CCOCC5)=O)NC(CN6C[C@@H](O[C@@H](C6)C)C)=O	925701-49-1	10 mM	547.67	S1570	ATM/ATR	KU-60019 is a potent and specific ATM inhibitor with IC50 of 6.3 nM.
BS-181 HCl	3-E8	0158617871	S-inhibitor	C1(=CC(=NC2N1N=CC=2C(C)C)NCCCCCCN)NCC3(=CC=CC=C3).Cl	1397219-81-6	10 mM	416.99	S1572	CDK	BS-181 is a highly selective CDK inhibitor for CDK7 with IC50 of 21 nM.
BIRB 796 (Doramapimod)	3-E9	0158617899	S-inhibitor	C1=C(C2=C(C(=C1)OCCN3CCOCC3)C=CC=C2)NC(NC4=CC(=NN4C5=CC=C(C=C5)C)C(C)(C)C)=O	285983-48-4	10 mM	527.66	S1574	p38 MAPK	BIRB 796 (Doramapimod) is a highly selective p38α MAPK inhibitor with Kd of 0.1 nM.
Tie2 kinase inhibitor	3-E10	0158617849	S-inhibitor	C12=C(C=CC(=C1)C3=C(N=C(N3)C4=CC=C(C=C4)S(C)=O)C5=CC=NC=C5)C=C(C=C2)OC	948557-43-5	10 mM	439.53	S1577	Tie-2	Tie2 kinase inhibitor is a potent and selective Tie2 inhibitor with IC50 of 0.25 μM.
PD 0332991 (Palbociclib) Isethionate	3-E11	0158617846	S-inhibitor	N1(C2C(C(C)=C(C1=O)C(C)=O)=CN=C(N=2)NC3C=CC(N4CCNCC4)=CN=3)C5(CCCC5).OCCS(O)(=O)=O	827022-33-3	10 mM	573.66	S1579	CDK	PD 0332991 (Palbociclib) Isethionate is the isethionate of PD 0332991, a highly specific inhibitor of CDK4 and CDK6 with IC50 of 11 nM and 16 nM, respectively.
H 89 2HCl	3-F2	0158617876	S-inhibitor	C1(=CC=C(C2=C1C=NC=C2)S(NCCNC/C=C/C3=CC=C(C=C3)Br)(=O)=O).Cl.Cl	130964-39-5	10 mM	519.28	S1582	PKA	H 89 2HCl is a mutiple-targeted inhibitor for S6K1, MSK1, PKA, ROCKII, PKBα and MAPKAP-K1b with IC50 of 80 nM, 120 nM, 135 nM, 270 nM, 2600 nM and 2800 nM, respectively.
TWS119	3-F3	0158617867	S-inhibitor	C1=CC=C(C=C1O)OC2=NC=NC3=C2C=C(N3)C4=CC=CC(=C4)N	601514-19-6	10 mM	318.33	S1590	GSK-3	TWS119 is a GSK-3β inhibitor with IC50 of 30 nM.
Apixaban	3-F4	0158617851	S-inhibitor	N1=C(C2=C(N1C3=CC=C(C=C3)OC)C(N(CC2)C4=CC=C(C=C4)N5C(CCCC5)=O)=O)C(N)=O	503612-47-3	10 mM	459.5	S1593	Factor Xa	Apixaban is a highly selective, reversible inhibitor of Factor Xa with Ki of 0.08 nM and 0.17 nM in human and rabbit, respectively.
Semagacestat (LY450139)	3-F5	0158617843	S-inhibitor	C([C@@H](C(N[C@H](C(N[C@@H]1C2=C(CCN(C(=O)1)C)C=CC=C2)=O)C)=O)O)(C)C	425386-60-3	10 mM	361.44	S1594	Gamma-secretase	Semagacestat (LY450139) is a γ-secretase blocker for Aβ42, Aβ40 and Aβ38 with IC50 of 10.9 nM, 12.1 nM and 12.0 nM, respectively. Semagacestat also inhibits Notch signaling with IC50 of 14.1 nM.
Pyridostigmine Bromide (Mestinon)	3-F6	0158617900	S-inhibitor	C1(=C(C=CC=[N+]1C)OC(N(C)C)=O).[Br-]	101-26-8	10 mM	261.12	S1608	AChR	Pyridostigmine Bromide(Mestinon) is a parasympathomimetic and a reversible cholinesterase inhibitor.
Silodosin (Rapaflo)	3-F7	0158617831	S-inhibitor	C1=CC=C(C(=C1)OCCN[C@H](C)CC2=CC3=C(C(=C2)C(N)=O)N(CC3)CCCO)OCC(F)(F)F	160970-54-7	10 mM	495.53	S1613	Adrenergic Receptor	Silodosin(Rapaflo) is an α1-adrenoceptor antagonist with high uroselectivity.
Allopurinol Sodium (Aloprim)	3-F8	0158617889	S-inhibitor	C1(=NC2=C(C(N1)=O)C=NN2).[Na+]	17795-21-0	10 mM	159.1	S1631		Allopurinol Sodium(Aloprim) is a xanthine oxidase inhibitor with an IC50 of 7.82±0.12 μM.
Enalaprilat dihydrate	3-F9	0158617902	S-inhibitor	C1(=CC=CC(=C1)CC[C@@H](C(O)=O)N[C@H](C(N2[C@@H](CCC2)C(=O)O)=O)C).O.O	84680-54-6	10 mM	348.4	S1657	RAAS	Enalaprilat is an angiotensin-converting enzyme (ACE) inhibitor with IC50 of 1.94 nM.
Aminophylline (Truphylline)	3-F10	0158617903	S-inhibitor	NCCN.N1(C(N(C2=C(C1=O)NC=N2)C)=O)C.N3(C(N(C4=C(C3=O)NC=N4)C)=O)C	317-34-0	10 mM	420.43	S1673	PDE	Aminophylline(Phyllocontin, Truphylline) is a competitive nonselective phosphodiesterase inhibitor with an IC50 of 0.12 mM and also a nonselective adenosine receptor antagonist.
Divalproex sodium	3-F11	0158616575	S-inhibitor	C(C([O-])=O)(CCC)CCC.[Na+].C(C(CCC)CCC)(=O)O	76584-70-8	10 mM	310.41	S1703	Autophagy	Divalproex sodium consists of a compound of sodium valproate and valproic acid in a 1:1 molar relationship in an enteric coated form.
Emtricitabine (Emtriva)	3-G2	0158617886	S-inhibitor	N1=C(C(=CN(C1=O)[C@H]2O[C@H](SC2)CO)F)N	143491-57-0	10 mM	247.25	S1704	Reverse Transcriptase	Emtricitabine (Emtriva) is a nucleoside reverse transcriptase inhibitor with an IC50 of 27.7 μM.
Gemcitabine (Gemzar)	3-G3	0158616540	S-inhibitor	N1=C(C=CN(C1=O)[C@@H]2O[C@@H]([C@H](C2(F)F)O)CO)N	95058-81-4	10 mM	263.2	S1714	Autophagy	Gemcitabine(Gemzar) belongs to the group of medicines called antimetabolites.
Adefovir Dipivoxil (Preveon, Hepsera)	3-G4	0158617885	S-inhibitor	C12=C(N=CN=C1N)N(C=N2)CCOCP(OCOC(C(C)(C)C)=O)(=O)OCOC(C(C)(C)C)=O	142340-99-6	10 mM	501.47	S1718	Reverse Transcriptase	Adefovir Dipivoxil(Preveon, Hepsera) works by blocking reverse transcriptase, an enzyme that is crucial for the hepatitis B virus (HBV) to reproduce in the body.
Esomeprazole magnesium (Nexium)	3-G5	0153714009	S-inhibitor	[Mg+2].C1(=C(C(=C(N=C1)CS(C2=NC3=C([N-]2)C=CC(=C3)OC)=O)C)OC)C.C4(=C(C(=C(N=C4)CS(C5=NC6=C([N-]5)C=CC(=C6)OC)=O)C)OC)C	161973-10-0	10 mM	713.12	S1743	Proton Pump	Esomeprazole magnesium(Nexium) is a proton pump inhibitor to reduce gastric acid secretion.
Oxybutynin (Ditropan)	3-G6	0158617856	S-inhibitor	C1(=CC=CC=C1)C(C2CCCCC2)(C(=O)OCC#CCN(CC)CC)O	5633-20-5	10 mM	357.49	S1754	AChR	Oxybutynin(Ditropan) is an anticholinergic medication used to relieve urinary and bladder difficulties.
Bacitracin zinc	3-G7	0158617837	S-inhibitor	C1(C(=O)N[C@H](C(N[C@@H](C(N[C@H](C(N[C@@H]2C(N[C@@H](C(=O)N[C@H](C(N[C@H](C(N[C@H](C(N[C@@H](C(N[C@H](C(NCCCC2)=O)CC(=O)N)=O)CC([O-])=O)=O)CC3N=CNC=3)=O)CC4=CC=CC=C4)=O)[C@@H](CC)C)CCCN)=O)=O)[C@@H](CC)C)=O)CCC(=O)[O-])=O)CC(C)C)(SC(=NC1)[C@@H](N)[C@@H](C)CC).[Zn+2]	1405-89-6	10 mM	1486.07	S1791		Bacitracin zinc is a dephosphorylation of the C55-isoprenyl pyrophosphate interference for inhibition of cleavage of Tyr from Met-enkephalin with IC50 of 10 μM.
Proparacaine HCl	3-G8	0158617953	S-inhibitor	C1(=C(C=CC(=C1)C(OCCN(CC)CC)=O)OCCC)N.Cl	5875-06-9	10 mM	330.85	S1828	Sodium Channel	Proparacaine HCl is a voltage-gated sodium channels antagonist with ED50 of 3.4 mM.
Adenine sulfate	3-G10	0158617972	S-inhibitor	S(=O)(=O)(O)O.C12(=C(C(=NC=N1)N)NC=N2).C34=C(C(=NC=N3)N)NC=N4	321-30-2	10 mM	368.33	S1982	DNA/RNA Synthesis	Adenine sulfate is a sulfate salt form of adenine which is a purine derivative and a nucleobase with a variety of roles in biochemistry.
Adenine HCl	3-G11	0158617934	S-inhibitor	C12(=C(C(=NC=N1)N)N=CN2).Cl	2922-28-3	10 mM	171.59	S1983	DNA/RNA Synthesis	Adenine hydrochloride is a hydrochloride salt form of adenine which is a purine derivative and a nucleobase with a variety of roles in biochemistry.
Sodium orthovanadate	3-H2	0158617940	S-inhibitor	[O-][V]([O-])(=O)[O-].[Na+].[Na+].[Na+]	13721-39-6	10 mM	183.91	S2000	ATPase	Sodium orthovanadate is an alkaline phosphatase and (Na,K)-ATPase inhibitor with IC50 of 10 μM.
Elvitegravir (GS-9137)	3-H3	0158617988	S-inhibitor	C1=CC(=C(C(=C1)Cl)F)CC2=CC3=C(C=C2OC)N(C=C(C3=O)C(O)=O)[C@@H](C(C)C)CO	697761-98-1	10 mM	447.88	S2001	Integrase	Elvitegravir (EVG, JTK-303/GS-9137) is a HIV integrase inhibitor for HIV-1 IIIB, HIV-2 EHO and HIV-2 ROD with IC50 of 0.7 nM, 2.8 nM and 1.4 nM, respectively.
Maraviroc	3-H4	0158617964	S-inhibitor	C1=CC=CC(=C1)[C@H](CCN2C3CCC2CC(C3)N4C(=NN=C4C(C)C)C)NC(C5CCC(CC5)(F)F)=O	376348-65-1	10 mM	513.67	S2003	CCR5	Maraviroc (Selzentry, UK-427857, Celsentri) is a CCR5 antagonist for MIP-1α, MIP-1β and RANTES with IC50 of 3.3 nM, 7.2 nM and 5.2 nM, respectively.
Raltegravir (MK-0518)	3-H5	0158617923	S-inhibitor	N1(C(=NC(=C(C1=O)O)C(NCC2=CC=C(C=C2)F)=O)C(NC(C3=NN=C(O3)C)=O)(C)C)C	518048-05-0	10 mM	444.42	S2005	Integrase	Raltegravir (MK-0518, Isentress) is a potent integrase (IN) inhibitor for WT and S217Q PFV IN with IC50 of 90 nM and 40 nM, respectivly.
Pramipexole 2HCl monohydrate	3-H6	0158617955	S-inhibitor	[C@@H]1(CCC2=C(C1)SC(=N2)N)NCCC.O.Cl.Cl	191217-81-9	10 mM	302.26	S2011	Dopamine Receptor	Pramipexole is a partial/full D2S, D2L, D3, D4, receptor agonist with a Ki of 3.9, 2.2, 0.5, 5.1 nM.
PCI-34051	3-H7	0158617932	S-inhibitor	N1(C=CC2C=CC(=CC1=2)C(=O)NO)CC3C=CC(=CC=3)OC	950762-95-5	10 mM	296.32	S2012	HDAC	PCI-34051 is a potent and specific HDAC8 inhibitor with IC50 of 10 nM.
PF 573228	3-H8	0158617939	S-inhibitor	N1C(CCC2C=C(C=CC1=2)NC3N=C(C(=CN=3)C(F)(F)F)NCC4C=C(C=CC=4)S(=O)(=O)C)=O	869288-64-2	10 mM	491.49	S2013	FAK	PF 573228 is a inhibitor of FAK with IC50 of 4 nM.
BMS-265246	3-H9	0158617942	S-inhibitor	C(=O)(C1C(=CC(=CC=1F)C)F)C2C(=C3C(=NC=2)NN=C3)OCCCC	582315-72-8	10 mM	345.34	S2014	CDK	BMS265246 is a potent and selective CDK inhibitor for CDK1/cyclin B and CDK2/cyclin E with IC50 of 6 nM and 9 nM, respectively.
ENMD-2076 L-(+)-Tartaric acid	3-H10	0150551084	S-inhibitor	N1(=C(C=C(N1)C)NC2=CC(=NC(=N2)/C=C/C3=CC=CC=C3)N4CCN(CC4)C).C([C@@H]([C@H](C(O)=O)O)O)(O)=O	1291074-87-7	10 mM	525.56	S2018	Aurora Kinase	ENMD-2076 L-(+)-Tartaric acid is the tartaric acid of ENMD-2076, a selective inhibitor of Aurora A and Aurora B with IC50 of 14 nM and 350 nM and also inhibits Flt3, Flt4 and VEGFR2 with IC50 of 1.86 nM, 15.9 nM and 58.2 nM, respectively.
Cyproheptadine HCl (Periactin)	3-H11	0158617946	S-inhibitor	C1(=C2CCN(CC2)C)(C3=C(C=CC4=C1C=CC=C4)C=CC=C3).Cl	969-33-5	10 mM	323.86	S2044	Histamine Receptor	Cyproheptadine hydrochloride (Periactin) is a hydrochloride salt form of cyproheptadine which is a histamine receptor antagonist for 5-HT2 receptor with IC50 of 0.6 nM._x000D_
Strontium ranelate (Protelos)	4-A2	0158617993	S-inhibitor	C1(N(CC([O-])=O)CC([O-])=O)(=C(C(=C(S1)C([O-])=O)CC([O-])=O)C#N).[Sr+2].[Sr+2]	135459-87-9	10 mM	513.49	S2050	Calcium Channel	Strontium ranelate (Protelos) is a strontium(II) salt of ranelic acid for (-)-desmethoxyverapamil binding to calcium channel with IC50 of 0.5 mM._x000D_
Gimeracil	4-A3	0158617924	S-inhibitor	C1(=CNC(C=C1O)=O)Cl	103766-25-2	10 mM	145.54	S2055	Dehydrogenase	Gimeracil is an inhibitor of dihydropyrimidine dehydrogenase, which inhibits the early step in homologous recombination for double strand breaks repair. _x000D_
Lafutidine	4-A4	0158617967	S-inhibitor	C1=C(N=CC=C1CN2CCCCC2)OC/C=C\CNC(CS(=O)CC3=CC=CO3)=O	118288-08-7	10 mM	431.55	S2065	Histamine Receptor	Lafutidine, a newly developed histamine H(2)-receptor antagonist, inhibits gastric acid secretion._x000D_
Mitiglinide calcium	4-A5	0158617949	S-inhibitor	[Ca+2].[C@@H](C([O-])=O)(CC(N1C[C@@]2([C@](C1)(CCCC2)[H])[H])=O)CC3(=CC=CC=C3).[C@@H](C([O-])=O)(CC(N4C[C@@]5([C@](C4)(CCCC5)[H])[H])=O)CC6=CC=CC=C6	145525-41-3	10 mM	668.88	S2073	Potassium Channel	Mitiglinide is a blood glucose-lowering drugs, stimulating insulin secretion by closing the ATP-sensitive K+ channels in pancreatic beta-cells._x000D_
Moexipril HCl	4-A6	0153713458	S-inhibitor	C1(=C(C=C2C(=C1)C[C@H](N(C2)C(=O)[C@H](C)N[C@H](C(=O)OCC)CCC3=CC=CC=C3)C(O)=O)OC)OC.Cl	82586-52-5	10 mM	535.03	S2079	RAAS	Moexipril hydrochloride is a potent orally active non-sulfhydryl angiotensin converting enzyme inhibitor (ACE) with IC50 of 0.041 ¦ÌM, which is used for the treatment of hypertension and congestive heart failure._x000D_
Cleviprex (Clevidipine)	4-A7	0153713463	S-inhibitor	CCCC(OCOC(C1=C(NC(=C(C1C2=CC=CC(=C2Cl)Cl)C(OC)=O)C)C)=O)=O	167221-71-8	10 mM	456.32	S2080	Calcium Channel	Cleviprex (Clevidipine) is a dihydropyridine calcium channel blocker use as agent for the reduction of blood pressure. _x000D_
Cilazapril monohydrate (Inhibace)	4-A8	0153713455	S-inhibitor	C1(=CC=C(C=C1)CC[C@H](N[C@H]2CCCN3N(C2=O)[C@H](CCC3)C(O)=O)C(=O)OCC).O	92077-78-6	10 mM	435.51	S2081	RAAS	Cilazapril is a angiotensin-converting enzyme (ACE) inhibitor used for the treatment of hypertension and congestive heart failure._x000D_
Duloxetine HCl (Cymbalta)	4-A9	0153713411	S-inhibitor	C1(=CC(=C2C(=C1)C=CC=C2)O[C@@H](CCNC)C3SC=CC=3).Cl	136434-34-9	10 mM	333.88	S2084	5-HT Receptor	Duloxetine is a serotonin-norepinephrine reuptake inhibitor with Ki of 4.6 nM, used for treatment of major depressive disorder and generalized anxiety disorder (GAD). _x000D_
Trimebutine	4-A10	0153713457	S-inhibitor	C1(=C(C(=CC(=C1)C(OCC(C2=CC=CC=C2)(CC)N(C)C)=O)OC)OC)OC	39133-31-8	10 mM	387.47	S2085	Opioid Receptor	Trimebutine is an agonist of peripheral mu, kappa and delta opiate receptors, used as spasmolytic agent for treatment of both acute and chronic abdominal pain. _x000D_
Ivabradine HCl (Procoralan)	4-A11	0153713439	S-inhibitor	C1(=C2C(=CC(=C1OC)OC)[C@@H](C2)CN(CCCN3CCC4=C(CC3=O)C=C(C(=C4)OC)OC)C).Cl	148849-67-6	10 mM	505.05	S2086	Adrenergic Receptor	Ivabradine, a new If inhibitor with IC 50 of 2.9 μM which acts specifically on the pacemaker activity of the sinoatrial node, is a pure heart rate lowering agent._x000D_
Rivastigmine tartrate (Exelon)	4-B2	0153713433	S-inhibitor	C1(=CC=CC(=C1)[C@@H](N(C)C)C)OC(N(C)CC)=O.OC([C@@H]([C@H](C(O)=O)O)O)=O	129101-54-8	10 mM	400.42	S2087	AChR	Rivastigmine, a cholinesterase inhibitor with IC50 of 5.5 μM, ues as a parasympathomimetic or cholinergic agent for the treatment of mild to moderate Alzheimer disease._x000D_
Dexmedetomidine HCl (Precedex)	4-B3	0153713456	S-inhibitor	C1(=C(C(=C(C=C1)C)C)[C@@H](C2NC=NC=2)C).Cl	145108-58-3	10 mM	236.74	S2090	Adrenergic Receptor	Dexmedetomidine is a highly selective and potent alpha-2 adrenoceptor agonist, which reduces anesthetic requirements for patients by providing significant sedation._x000D_
Betaxolol (Betoptic)	4-B4	0158618213	S-inhibitor	C1=CC(=CC=C1CCOCC2CC2)OCC(CNC(C)C)O	659-18-7	10 mM	307.43	S2091	Adrenergic Receptor	Betaxolol is a selective beta1 adrenergic receptor blocker used in the treatment of hypertension and glaucoma. _x000D_
Detomidine HCl	4-B5	0153713408	S-inhibitor	C1(=CC=CC(=C1C)C)CC2(N=CNC=2).Cl	90038-01-0	10 mM	222.71	S2092	Adrenergic Receptor	Detomidine produce dose-dependent sedative and analgesic effects, mediatated by activation of α2 catecholamine receptors._x000D_
Fosinopril sodium (Monopril)	4-B6	0153713386	S-inhibitor	C(P(O[C@@H](C(C)C)OC(CC)=O)(=O)CC(N1[C@@H](C[C@H](C1)C2CCCCC2)C([O-])=O)=O)CCCC3(=CC=CC=C3).[Na+]	88889-14-9	10 mM	585.64	S2095	RAAS	Fosinopril sodium (Monopril) is the ester prodrug of an angiotensin-converting enzyme (ACE) inhibitor, used for the treatment of hypertension and some types of chronic heart failure._x000D_
Almotriptan malate (Axert)	4-B7	0153713465	S-inhibitor	C1(=CC=C2C(=C1)C(=CN2)CCN(C)C)CS(N3CCCC3)(=O)=O.C(C(CC(O)=O)O)(=O)O	181183-52-8	10 mM	469.55	S2096	5-HT Receptor	Almotriptan malate (Axert) is a selective 5-hydroxytryptamine1B/1D (5-HT1B/1D) receptor agonist, used for the treatment of Migraine attacks in adults._x000D_
Temocapril HCl	4-B8	0153713414	S-inhibitor	C1(=CC=CC(=C1)CC[C@H](N[C@@H]2C(N(C[C@H](SC2)C3SC=CC=3)CC(O)=O)=O)C(OCC)=O).Cl	110221-44-8	10 mM	513.07	S2099	RAAS	Temocapril HCl is the hydrochloride of Temocapril, which is a long-acting angiotensin-converting enzyme (ACE) inhibitor, used for the treatment of hypertension._x000D_
Rasagiline mesylate	4-B9	0153713409	S-inhibitor	C1(=CC=C2C(=C1)[C@H](CC2)NCC#C).O=S(=O)(C)O	161735-79-1	10 mM	267.34	S2102	MAO	Rasagiline mesylate is a new MAO-B inhibitor for the treatment of idiopathic Parkinson's disease._x000D_
Blonanserin (Lonasen)	4-B10	0153713385	S-inhibitor	C1(C2=CC=C(C=C2)F)=C3C(=NC(=C1)N4CCN(CC4)CC)CCCCCC3	132810-10-7	10 mM	367.5	S2112	5-HT Receptor	Blonanserin is a novel atypical antipsychotic agent with potent dopamine D2 (Ki, 14.8 nM) and serotonin 5-HT2(Ki, 3.98 nM) receptors antagonist properties._x000D_
Cisatracurium besylate (Nimbex)	4-B11	0153713431	S-inhibitor	C1(=C(C=C2C(=C1)CC[N@@+]([C@@H]2CC3=CC=C(C(=C3)OC)OC)(CCC(OCCCCCOC(CC[N@@+]4([C@@H](C5=CC(=C(C=C5CC4)OC)OC)CC6=CC=C(C(=C6)OC)OC)C)=O)=O)C)OC)OC.C7(=CC=CC=C7S([O-])(=O)=O).C8=CC=CC=C8S([O-])(=O)=O	96946-42-8	10 mM	1243.48	S2113	Adrenergic Receptor	Cisatracurium besylate is a nondepolarizing neuromuscular blocking agent, antagonizing the action of acetylcholine by inhibiting neuromuscular transmission._x000D_
Bazedoxifene HCl	4-C2	0158618271	S-inhibitor	C1(N(C2=CC=C(C=C(C=1C)2)O)CC3=CC=C(OCCN4CCCCCC4)C=C3)C5(=CC=C(O)C=C5).Cl	198480-56-7	10 mM	507.06	S2128	Estrogen/progestogen Receptor	Bazedoxifene HCl is a novel, non-steroidal, indole-based estrogen receptor modulator (SERM) binding to both ERα and ERβ with IC50 of 23 nM and 89 nM.
Roflumilast (Daxas)	4-C3	0153713406	S-inhibitor	N1=CC(=C(C(=C1)Cl)NC(C2=CC=C(C(=C2)OCC3CC3)OC(F)F)=O)Cl	162401-32-3	10 mM	403.21	S2131	PDE	Roflumilast (Daxas) is a selective inhibitor of PDE4 with IC50 of 0.2-4.3 nM.
AZD8330	4-C4	0153713418	S-inhibitor	C1=C(C=CC(=C1F)NC2N(C(C(=CC=2C(NOCCO)=O)C)=O)C)I	869357-68-6	10 mM	461.23	S2134	MEK	AZD8330 (ARRY-424704) is a MEK 1/2 inhibitor with IC50 of 7 nM.
GSK1292263	4-C5	0153713404	S-inhibitor	C1(C=CC(=CN=1)OCC2CCN(CC2)C3=NC(=NO3)C(C)C)C4C=CC(=CC=4)S(=O)(=O)C	1032823-75-8	10 mM	456.56	S2149	GPR	GSK-1292263 is a novel GPR119 agonist.
Neratinib (HKI-272)	4-C6	0153713378	S-inhibitor	C1(=C(C=C2C(=C1)N=CC(=C2NC3=CC=C(C(=C3)Cl)OCC4=NC=CC=C4)C#N)NC(/C=C/CN(C)C)=O)OCC	698387-09-6	10 mM	557.04	S2150	EGFR	Neratinib (HKI-272) is a highly selective HER2 and EGFR inhibitor with IC50 of 59 nM and 92 nM, respectively.
LDE225 (NVP-LDE225, Erismodegib)	4-C7	0158618221	S-inhibitor	C1(=CC=C(N=C1)N2C[C@@H](O[C@@H](C2)C)C)NC(C3=C(C(=CC=C3)C4=CC=C(C=C4)OC(F)(F)F)C)=O	956697-53-3	10 mM	485.5	S2151	Smoothened	LDE225 (NVP-LDE225) is a smoothened antagonist with IC50 of 1.3 nM (mouse) and 2.5 nM (human), respectively.
CGS 21680 HCl	4-C8	0158618259	S-inhibitor	C12(=C(N=C(N=C1N)NCCC3=CC=C(C=C3)CCC(O)=O)N(C=N2)[C@@H]4O[C@@H]([C@H]([C@@H]4O)O)C(NCC)=O).Cl	124431-80-7	10 mM	535.98	S2153	5-alpha Reductase	CGS 21680 hydrochloride is an A2A adenosine receptor agonist with an Ki of 27 nM.
LY2608204	4-C10	0153713379	S-inhibitor	C1=C(C=CC(=C1)[C@]2(C[C@@H]2C3CCCCC3)C(NC4=NC=C(S4)SCCN5CCCC5)=O)S(C6CC6)(=O)=O	1234703-40-2	10 mM	559.81	S2155		LY2608204 activates glucokinase (GK) with EC50 of 42 nM.
LY2886721	4-C11	0158618303	S-inhibitor	C1=C(C=CC(=N1)C(NC2=CC=C(C(=C2)[C@@]34N=C(SC[C@]3(COC4)[H])N)F)=O)F	1262036-50-9	10 mM	390.41	S2156		LY2886721 is an BACE inhibitor used for the treatment of Alzheimer's Disease.
LY2940680	4-D2	0153713403	S-inhibitor	C1(=NN=C(C2=C1C=CC=C2)N3CCC(CC3)N(C)C(=O)C4=C(C=C(C=C4)F)C(F)(F)F)C5=CC=NN5C	1258861-20-9	10 mM	512.5	S2157	Hedgehog	LY2940680 binds to the Smo receptor and potently inhibits Hh signaling.
KW 2449	4-D3	0153713421	S-inhibitor	C1=CC=CC2=C1NN=C2/C=C/C3=CC=C(C=C3)C(=O)N4CCNCC4	1000669-72-6	10 mM	332.4	S2158	Aurora Kinase	KW-2449 potently inhibits Flt3, Abl and Aurora A with IC50 of 6.6 nM, 14 nM and 48 nM, respectively.
Tebipenem pivoxil (L-084)	4-D4	0153713405	S-inhibitor	[C@]1(C(N2[C@]1([C@@H](C(=C2C(OCOC(C(C)(C)C)=O)=O)SC3CN(C3)C4SCCN=4)C)[H])=O)([C@@H](C)O)[H]	161715-24-8	10 mM	497.63	S2159		Tebipenem pivoxil(L-084) is a novel oral carbapenem antibiotic with an IC50 of 100 μg/ml for human CYP isoforms
PF-4708671	4-D5	0153713402	S-inhibitor	N1C(=NC2=C1C=CC(=C2)C(F)(F)F)CN3CCN(C4=NC=NC=C4CC)CC3	1255517-76-0	10 mM	390.41	S2163	S6 Kinase	PF-4708671 is a cell-permeable inhibitor of p70 ribosomal S6 kinase (S6K1 isoform) with Ki of 20 nM and IC50 of 160 nM.
PD 128907 HCl	4-D6	0153713420	S-inhibitor	C1(=CC=C2C(=C1)[C@@]3([C@](CO2)(N(CCO3)CCC)[H])[H])O	112960-16-4	10 mM	285.77	S2168	Dopamine Receptor	PD 128907 HCl is a potent and selective dopamine D2/D3 receptors agonist.
ITF2357 (Givinostat)	4-D7	0153713399	S-inhibitor	C1(=CC2=C(C=C1CN(CC)CC)C=CC(=C2)COC(NC3=CC=C(C=C3)C(NO)=O)=O).O.Cl	732302-99-7	10 mM	475.97	S2170	HDAC	ITF2357 (Givinostat) is a potent inhibitor of HDAC with IC50 of 7.5-16 nM.
AG14361	4-D8	0153713401	S-inhibitor	C12=C3C=CC=C1N=C(N2CCNC3=O)C4=CC=C(C=C4)CN(C)C	328543-09-5	10 mM	320.39	S2178	PARP	AG14361 is a potent inhibitor of PARP1 with Ki of < 5 nM.
LY2784544	4-D9	0153713400	S-inhibitor	C1C(=NN2C(C=1CN3CCOCC3)=NC(=C2CC4=CC=C(C=C4F)Cl)C)NC5NN=C(C=5)C	1229236-86-5	10 mM	469.94	S2179	JAK	LY2784544 is selective to V617F mutant JAK2 with IC50 of 55 nM in Ba/F3 cells.
MLN2238	4-D10	0158618284	S-inhibitor	C1=CC(=CC(=C1Cl)C(NCC(N[C@H](B(O)O)CC(C)C)=O)=O)Cl	1072833-77-2	10 mM	361.03	S2180	Proteasome	MLN2238 inhibits the chymotrypsin-like proteolytic (β5) site of the 20S proteasome with IC50 and Ki of 3.4 nM and 0.93 nM, respectively.
MLN9708	4-D11	0153713427	S-inhibitor	C1=CC(=CC(=C1Cl)C(NCC(N[C@H](B2OC(CC(O2)=O)(C(=O)O)CC(=O)O)CC(C)C)=O)=O)Cl	1201902-80-8	10 mM	517.12	S2181	Proteasome	MLN9708 is a selective inhibitor of chymotrypsin-like proteolytic (β5) site of the 20S proteasome with IC50 and Ki of 3.4 nM and 0.93 nM.
SB 743921	4-E2	0158618277	S-inhibitor	C1(=CC(=CC=C1)CC2C(C3=C(OC=2[C@H](N(C(=O)C4=CC=C(C=C4)C)CCCN)C(C)C)C=C(C=C3)Cl)=O).Cl	940929-33-9	10 mM	553.52	S2182	Kinesin	SB 743921 is a KSP inhibitor with IC50 of 0.2 nM, 0.07 nM, 1.7 nM, 0.06 nM and 14.4 nM in SKOV3, Colo205, MV522, MX1 and P388 cell lines, respectively.
BGJ398 (NVP-BGJ398)	4-E3	0153713426	S-inhibitor	N(C(=O)NC1C(=C(C=C(C=1Cl)OC)OC)Cl)(C)C2N=CN=C(C=2)NC3C=CC(=CC=3)N4CCN(CC4)CC	872511-34-7	10 mM	560.48	S2183	FGFR	BGJ398 (NVP-BGJ398) is a potent and selective inhibitor of FGFR1, FGFR2 and FGFR3 with IC50 of 0.9 nM, 1.4 nM and 1 nM, respectively.
AST-1306	4-E4	0153713428	S-inhibitor	C(C=C)(=O)NC1(=CC2=C(N=CN=C(C=C1)2)NC3C=C(C(=CC=3)OCC4C=C(C=CC=4)F)Cl).C5=CC(=CC=C5S(O)(=O)=O)C	1050500-29-2	10 mM	621.08	S2185	EGFR	AST-1306 is a novel irreversible inhibitor of EGFR and ErbB4 with IC50 of 0.5 nM and 0.8 nM, respectively.
SB-505124	4-E5	0153713382	S-inhibitor	C1(=CC=CC(=N1)C2NC(=NC=2C3=CC4=C(C=C3)OCO4)C(C)(C)C)C	694433-59-5	10 mM	335.4	S2186	TGF-beta/Smad	SB505124 is a selective inhibitor of ALK4 and ALK5 with IC50 of 129 nM and 47 nM, respectively.
Avasimibe (CI-1011)	4-E6	0158618256	S-inhibitor	C1=C(C=C(C(=C1C(C)C)CC(NS(OC2=C(C=CC=C2C(C)C)C(C)C)(=O)=O)=O)C(C)C)C(C)C	166518-60-1	10 mM	501.72	S2187	P450 (e.g. CYP17)	Avasimibe inhibits ACAT and CYP2C9 with IC50 of 3.3 μM and 2.9 μM, respectively.
AZD8931	4-E7	0153713444	S-inhibitor	C1(=C(C=C2C(=C1)C(=NC=N2)NC3=C(F)C(=CC=C3)Cl)OC)OC4CCN(CC4)CC(NC)=O	848942-61-0	10 mM	473.93	S2192	EGFR	AZD8931 is a reversible, ATP competitive inhibitor of EGFR, ErbB2 and ErbB3 with IC50 of 4 nM, 3 nM and 4 nM, respectively.
GSK461364	4-E8	0153713429	S-inhibitor	C1N(CCN(C1)CC2=CC3=C(C=C2)N=CN3C4=CC(=C(S4)C(=O)N)O[C@H](C)C5=CC=CC=C5C(F)(F)F)C	929095-18-1	10 mM	543.6	S2193	PLK	GSK461364 inhibits purified Plk1 with Ki of 2 nM.
R406	4-E9	0153713450	S-inhibitor	C1(=C(C=C(C=C1OC)NC2=NC(=C(C=N2)F)NC3=NC4=C(C=C3)OC(C(N4)=O)(C)C)OC)OC.C5=CC=CC(=C5)S(O)(=O)=O	841290-81-1	10 mM	628.63	S2194	FLT3	R406 is a potent Syk inhibitor with IC50 of 41 nM and also potently inhibits Flt3.
SGI-1776 free base	4-E10	0158618281	S-inhibitor	C1C(=NN2C(C=1)=NC=C2C3=CC=CC(=C3)OC(F)(F)F)NCC4CCN(CC4)C	1025065-69-3	10 mM	405.42	S2198	Pim	SGI-1776 is a novel ATP competitive inhibitor to Pim1, Pim2 and Pim3 with IC50 of 7 nM, 363 nM and 69 nM, respectively.
BMS 794833	4-E11	0153713469	S-inhibitor	N1=C(C(=C(C=C1)OC2=CC=C(C=C2F)NC(C3=CNC=C(C3=O)C4=CC=C(C=C4)F)=O)Cl)N	1174046-72-0	10 mM	468.84	S2201	c-Met	BMS794833 is a potent ATP competitive inhibitor of Met and VEGFR2 with IC50 of 1.7 nM and 15 nM, respectively.
NVP-BHG712	4-F2	0153713451	S-inhibitor	C12=C(N=C(N=C1NC3=CC(=CC=C3C)C(NC4=CC=CC(=C4)C(F)(F)F)=O)C5=CC=CN=C5)N(N=C2)C	940310-85-0	10 mM	503.48	S2202	Bcr-Abl	NVP-BHG712 is a specific inhibitor of c-Raf, c-Src and c-Abl with IC50 of 0.395 μM, 1.266 μM and 1.667 μM and also inhibits EphB4 and VEGFR2 with ED50 of 25 nM and 4.2 μM, respectively.
R935788 (Fostamatinib disodium, R788 disodium)	4-F4	0153713442	S-inhibitor	C1(=C(C(=CC(=C1)NC2=NC=C(C(=N2)NC3=CC=C4C(=N3)N(C(C(O4)(C)C)=O)COP([O-])([O-])=O)F)OC)OC)OC.[Na+].[Na+]	1025687-58-4	10 mM	624.42	S2206	Syk	R935788 (Fostamatinib disodium, R788) is a Syk inhibitor with IC50 of 41 nM.
PIK-293	4-F5	0153713441	S-inhibitor	C1(N(C(C2=C(N=1)C=CC=C2C)=O)C3=C(C=CC=C3)C)CN4N=CC5=C4N=CN=C5N	900185-01-5	10 mM	397.43	S2207	PI3K	PIK-293 is a PI3-K inhibitor for p110α, p110β, p110δ and p110γ with IC50 of 100 μM, 25 μM, 0.24 μM and 10 μM, respectively.
Vinflunine Tartrate	4-F6	0158618235	S-inhibitor	C1(=C(C=C2C(=C1)[C@]34[C@@](N2C)([C@@]([C@@H]([C@]5([C@]3(N(CC=C5)CC4)[H])CC)OC(C)=O)(O)C(OC)=O)[H])OC)[C@@]6(C7=C(C8=C(N7)C=CC=C8)CN9C[C@@H](C[C@H](C6)C9)C(C)(F)F)C(OC)=O.C([C@@H]([C@H](C(=O)O)O)O)(=O)O	1201898-17-0	10 mM	967.02	S2209	Microtubule Associated	Vinflunine is a new vinca alkaloid uniquely fluorinated with the properties of mitotic-arresting and tubulin-interacting activity.
AZ 960	4-F7	0153713423	S-inhibitor	C1=C(C(=NC(=C1F)NC2C=C(NN=2)C)N[C@H](C3=CC=C(C=C3)F)C)C#N	905586-69-8	10 mM	354.36	S2214	JAK	AZ 960 is a novel ATP competitive JAK2 inhibitor with IC50 and Ki of <3 nM and 0.45 nM, respectively.
PP242	4-F8	0153713438	S-inhibitor	N1=CN=C2C(=C1N)C(=NN2C(C)C)C3NC4=C(C=3)C=C(C=C4)O	1092351-67-1	10 mM	308.34	S2218	Autophagy	PP242 is a selective mTOR inhibitor with IC50 of 8 nM.
Cyt387	4-F9	0153713315	S-inhibitor	C1=C(C=CC(=C1)NC2=NC=CC(=N2)C3=CC=C(C=C3)C(NCC#N)=O)N4CCOCC4	1056634-68-4	10 mM	414.46	S2219	JAK	CYT387 is an ATP-competitive inhibitor of JAK1 and JAK2 with IC50 of 11 nM and 18 nM, respectively.
Apatinib (YN968D1)	4-F10	0153713460	S-inhibitor	S(=O)(O)(C)=O.C1=CN=C(C(=C1)C(NC2=CC=C(C=C2)C3(CCCC3)C#N)=O)NCC4=CC=NC=C4	811803-05-1	10 mM	493.58	S2221	VEGFR	Apatinib (YN968D1) is an orally bioavailable, selective VEGFR2 inhibitor with IC50 of 1 nM.
TAME	4-F11	0153713412	S-inhibitor	C1=C(C=CC(=C1)S(N[C@H](C(OC)=O)CCCNC(=N)N)(=O)=O)C	901-47-3	10 mM	342.41	S2225	APC	Tosyl-L-Arginine Methyl Ester (TAME) is an APC inhibitor and also inhibits an E3 ubiquitin ligase called "anaphase-promoting complex/cyclosome (APC/C)".
CAL-101 (GS-1101)	4-G2	0153713389	S-inhibitor	C1=CC=C2C(=C1F)C(N(C(=N2)[C@@H](NC3=C4C(=NC=N3)NC=N4)CC)C5=CC=CC=C5)=O	870281-82-6	10 mM	415.42	S2226	PI3K	CAL-101 is a selective PI3K class I inhibitor of p110δ with IC50 of 2.5 nM.
PIK-294	4-G3	0153713417	S-inhibitor	N1=CN=C2C(=C1N)C(=NN2CC3N(C(C4=C(N=3)C=CC=C4C)=O)C5=C(C=CC=C5)C)C6=CC(=CC=C6)O	900185-02-6	10 mM	489.53	S2227	PI3K	PIK-294 is a highly potent and selective p110δ inhibitor with IC50 of 10 nM.
Eltrombopag (SB-497115-GR)	4-G4	0153713446	S-inhibitor	C1=C(C(=C(C=C1)C2=CC=CC(=C2)C(O)=O)O)N/N=C3/C(N(N=C3C)C4=CC=C(C(=C4)C)C)=O	496775-61-2	10 mM	442.47	S2229		Eltrombopag (SB-497115-GR, Promacta, Revolade) is a small molecule agonist of the c-mpl (TpoR) receptor with an IC50 of 0.69 μM for the inhibition of hERG K+ channel tail current.
LY2157299	4-G5	0153713470	S-inhibitor	C1(=CC=CC(=N1)C2=NN3C(=C(C4=CC=NC5=C4C=C(C=C5)C(=O)N)2)CCC3)C	700874-72-2	10 mM	369.42	S2230	TGF-beta/Smad	LY2157299 is a potent TGFβ receptor I (TβRI) inhibitor with IC50 of 56 nM.
Telatinib (BAY 57-9352)	4-G6	0153713384	S-inhibitor	N1=C(C2=C(C(=N1)OCC3=CC(=NC=C3)C(=O)NC)OC=C2)NC4=CC=C(C=C4)Cl	332012-40-5	10 mM	409.83	S2231	c-Kit	Telatinib (BAY 57-9352) is a potent inhibitor of VEGFR2/3, c-Kit and PDGFRβ with IC50 of 6 nM/4 nM, 1 nM and 15 nM, respectively.
Esomeprazole sodium (Nexium)	4-G7	0153713377	S-inhibitor	C1(=CC=C2C(=C1)N=C([N-]2)S(CC3=NC=C(C(=C3C)OC)C)=O)OC.[Na+]	161796-78-7	10 mM	367.4	S2233	ATPase	Esomeprazole sodium (Nexium) is a sodium salt of esomeprazole that is a potent proton pump inhibitor with an IC50 of 0.076 mg/kg.
BI6727 (Volasertib)	4-G8	0153713556	S-inhibitor	[C@H]1(C(N(C2=C(N1C(C)C)N=C(N=C2)NC3=CC=C(C=C3OC)C(N[C@@H]4CC[C@H](CC4)N5CCN(CC5)CC6CC6)=O)C)=O)CC	755038-65-4	10 mM	618.81	S2235	PLK	BI6727 (Volasertib) is a highly potent Plk1 inhibitor with IC50 of 0.87 nM.
Palomid 529	4-G9	0153713553	S-inhibitor	C1=C(C=CC(=C1)COC2=C(C=C3C(=C2)OC(C4=C3C=CC(=C4)C(C)O)=O)OC)OC	914913-88-5	10 mM	406.43	S2238	mTOR	Palomid 529 (P529) is a PI3K/Akt/mTOR inhibitor for VEGF-A and bFGF with IC50 of 10 nM and 30 nM, respectively.
Fesoterodine fumarate (Toviaz)	4-G10	0153713534	S-inhibitor	C1(=C(C=CC=C1)[C@@H](CCN(C(C)C)C(C)C)C2=C(C=CC(=C2)CO)OC(C(C)C)=O).C(=C/C(O)=O)/C(O)=O	286930-03-8	10 mM	527.65	S2240	AChR	Fesoterodine fumarate (Toviaz) is an antimuscarinic agent and is rapidly de-esterified to its active metabolite 5-hydroxymethyl tolterodine that is a muscarinic receptor antagonist.
WP1130	4-G11	0153713559	S-inhibitor	C1(=CC=CC(=N1)/C=C(/C(N[C@H](C2=CC=CC=C2)CCC)=O)C#N)Br	856243-80-6	10 mM	384.27	S2243	Bcr-Abl	WP1130 (degrasyn) is a selective deubiquitinase (DUB: USP5, UCH-L1, USP9x, USP14, and UCH37) inhibitor and also inhibits Bcr/Abl with IC50 of 1.8 μM.
AR-42 (HDAC-42)	4-H2	0153713557	S-inhibitor	C1=CC=C(C=C1)[C@@H](C(NC2=CC=C(C=C2)C(NO)=O)=O)C(C)C	935881-37-1	10 mM	312.36	S2244	HDAC	AR-42 (HDAC-42, OSU-HDAC42) is a pan-HDAC inhibitor with IC50 30 nM.
CP-466722	4-H3	0153713552	S-inhibitor	C1=CC=CN=C1C2=NN(C(=N2)N)C3C4C(N=CN=3)=CC(=C(C=4)OC)OC	1080622-86-1	10 mM	349.35	S2245	ATM/ATR	CP-466722 is an potent and reversible ATM inhibitor.
Abiraterone Acetate (CB7630)	4-H4	0153713554	S-inhibitor	N1=CC(=CC=C1)C2[C@@]3([C@@](CC=2)([C@@]4([C@@](CC3)([C@@]5(C(=CC4)C[C@H](CC5)OC(C)=O)C)[H])[H])[H])C	154229-18-2	10 mM	391.55	S2246	P450 (e.g. CYP17)	Abiraterone acetate (CB7630, CB 7630, CB-7630) is an acetate salt form of Abiraterone which is a steroidal cytochrome CYP17 inhibitor with IC50 of 72 nM.
BKM120 (NVP-BKM120)	4-H5	0153713533	S-inhibitor	C1=C(N=CC(=C1C(F)(F)F)C2=NC(=NC(=C2)N3CCOCC3)N4CCOCC4)N	944396-07-0	10 mM	410.39	S2247	PI3K	BKM120 is a selective PI3K inhibitor of p110α, p110β, p110δ and p110γ with IC50 of 52-99 nM, 166 nM, 116 nM and 262 nM, respectively.
CX-4945 (Silmitasertib)	4-H6	0153713562	S-inhibitor	C1=NC=C2C(=C1)C(=NC3=C2C=CC(=C3)C(=O)O)NC4=CC(=CC=C4)Cl	1009820-21-6	10 mM	349.77	S2248	PKC	CX-4945 is a potent and selective inhibitor of CK2α and CK2α' with IC50 of 1 nM.
Matrine ((+)-Matrine)	4-H7	0153713506	S-inhibitor	C1CCN2[C@]3([C@]1(CN4[C@@]([C@](CCC2)3[H])(CCCC4=O)[H])[H])[H]	519-02-8	10 mM	248.36	S2322	Opioid Receptor	Matrine((+)-Matrine) is an alkaloid found in plants from the Sophora family. It has a variety of pharmacological effects, including anti-cancer effects, and action as a kappa opioid receptor agonist.
5-hydroxytryptophan (5-HTP)	4-H8	0153713479	S-inhibitor	C1(=CC=C2C(=C1)C(=CN2)CC(C(O)=O)N)O	56-69-9	10 mM	220.22	S2374		5-Hydroxytryptophan(5-HTP) is decarboxylated to serotonin (5-hydroxytryptamine or 5-HT) by the enzyme aromatic-L-amino-acid decarboxylase with the help of Vitamin B6.
Dioscin (Collettiside III)	4-H9	0153713509	S-inhibitor	[C@H]1([C@H]([C@@H](O[C@]([C@H]1O)(O[C@H]2[C@H](O)[C@H]([C@@](O[C@H]2CO)(O[C@H]3CC4[C@](CC3)([C@]5([C@@](CC=4)([C@]6([C@](CC5)([C@]7([C@](C6)(O[C@]8([C@@H]7C)OC[C@@H](CC8)C)[H])[H])C)[H])[H])[H])C)[H])O[C@]9([C@@H]([C@@H]([C@H]([C@@H](O9)C)O)O)O)[H])[H])C)O)O	19057-60-4	10 mM	869.04	S2379		Dioscin(Collettiside III) is a saponin extracted and isolated from Polygonatum Zanlanscianense Pamp with IC50 of 2.6, 0.8, 7.5, and 4.5 μM for the inhibition of the growth of the MDA-MB-435, H14, HL60, and HeLa cell lines, respectively.
Sodium Danshensu	4-H10	0153713540	S-inhibitor	C1(=C(C=CC(=C1)CC(C(=O)[O-])O)O)O.[Na+]	67920-52-9	10 mM	220.15	S2401	P450 (e.g. CYP17)	Sodium Danshensu is a mono sodium of danshensu which is a compound isolated from Salvia miltiorrhiza Bge.
Astragaloside A	4-H11	0153713512	S-inhibitor	[C@@H]1([C@@H]([C@H]([C@@H](OC1)O[C@@H]2C([C@]3([C@]4(CC2)[C@@]5([C@@](C[C@@H]3O[C@@H]6O[C@@H]([C@H]([C@@H]([C@@H]6O)O)O)CO)([C@]7([C@](CC5)([C@@]([C@H](C7)O)([C@@]8(CC[C@@H](O8)C(C)(C)O)C)[H])C)C)[H])C4)[H])(C)C)O)O)O	83207-58-3	10 mM	784.97	S2415	TGF-beta/Smad	Astragaloside A is a pure small molecular compound isolated from Radix Astragali and is commonly used in the treatment of degenerative bone diseases such as osteoporosis.
Synephrine HCl	5-A2	0153713475	S-inhibitor	C1(=C(C=CC(=C1)C(CNC)O)O).Cl	5985-28-4	10 mM	203.67	S2438	Adrenergic Receptor	Synephrine HCl (Oxedrine, p-Synephrine) is a sympathomimetic α-adrenergic receptor (AR) agonist.
Equol	5-A3	0153713547	S-inhibitor	C1[C@@H](CC2C(O1)=CC(=CC=2)O)C3C=CC(=CC=3)O	531-95-3	10 mM	242.27	S2450	Estrogen/progestogen Receptor	Equol is an isoflavandiol metabolized from daidzein by bacterial flora in the intestines.
Manidipine (Manyper)	5-A4	0153713489	S-inhibitor	C1(=CC(=CC=C1)C2C(=C(NC(=C2C(OCCN3CCN(CC3)C(C4=CC=CC=C4)C5=CC=CC=C5)=O)C)C)C(=O)OC)[N+]([O-])=O	89226-50-6	10 mM	610.7	S2481	Calcium Channel	Manidipine (Manyper) is a lipophilic, third-generation, highly vasoselective dihydropyridine calcium antagonist with an IC50 of 2.6 nM.
L-Adrenaline (Epinephrine)	5-A5	0153715095	S-inhibitor	C1(=C(C=CC(=C1)[C@@H](O)CNC)O)O	51-43-4	10 mM	183.2	S2522	Adrenergic Receptor	L-Adrenaline (Epinephrine) belongs to a group of the compounds known as catecholamines.
DL-Adrenaline	5-A6	0153715092	S-inhibitor	C1(=C(C=CC(=C1)C(CNC)O)O)O	329-65-7	10 mM	183.2	S2523	Adrenergic Receptor	DL-Adrenaline is a hormone and a neurotransmitter secreted by the medulla of the adrenal glands.
Asaraldehyde (Asaronaldehyde)	5-A7	0158618567	S-inhibitor	C1(=C(C=C(C(=C1)C=O)OC)OC)OC	4460-86-0	10 mM	196.2	S2531	COX	Asaraldehyde (Asaronaldehyde) is natural COX-2 inhibitor.
Scopine	5-A8	0153715088	S-inhibitor	[C@]12([C@@]3([C@]([C@@](N1C)(C[C@@H](C2)O)[H])(O3)[H])[H])[H]	498-45-3	10 mM	155.19	S2545	Adrenergic Receptor	Scopine is the metabolite of anisodine, which is a α1-adrenergic receptor agonist and used in the treatment of acute circulatory shock._x000D_
Tiotropium Bromide hydrate	5-A9	0153715071	S-inhibitor	[Br-].O.[C@]12([C@@H]3[C@H]([C@@]([N+]1(C)C)(C[C@@H](C2)OC(C(C4=CC=CS4)(C5=CC=CS5)O)=O)[H])O3)[H]	139404-48-1	10 mM	490.43	S2547	AChR	Tiotropium Bromide hydrate is a monohydrate of tiotropium bromide (Spiriva; Tiova; BA 679BR; tiopropium) that is an anticholinergic and bronchodilator and a muscarinic receptor antagonist.
Scopine HCl	5-A10	0158618523	S-inhibitor	Cl.[C@]12([C@@]3([C@]([C@@](N1C)(C[C@@H](C2)O)[H])(O3)[H])[H])[H]	85700-55-6	10 mM	191.66	S2548		Scopine HCl is the hydrochloride of Scopine, which is the metabolite of anisodine, which is a α1-adrenergic receptor agonist and used in the treatment of acute circulatory shock._x000D_
Tolterodine tartrate (Detrol LA)	5-A11	0153715087	S-inhibitor	C1(=C(C=C(C(=C1)O)[C@@H](C2=CC=CC=C2)CCN(C(C)C)C(C)C)C).O=C(O)[C@@H]([C@H](C(O)=O)O)O	124937-52-6	10 mM	475.57	S2550	AChR	Tolterodine tartrate (Detrol LA) is a tartrate salt of tolterodine that is a competitive muscarinic receptor antagonist.
Tolvaptan (OPC-41061)	5-B2	0153715083	S-inhibitor	C(C1=C(C=C(C=C1)NC(=O)C2=CC=CC=C2C)C)(=O)N3CCCC(C4=C3C=CC(=C4)Cl)O	150683-30-0	10 mM	448.94	S2593	Vasopressin Receptor	Tolvaptan (OPC-41061) is a selective, competitive arginine vasopressin receptor 2 antagonist with an IC50 of 1.28¦ÌM for the inhibition of AVP-induced platelet aggregation.
Arecoline	5-B3	0153715102	S-inhibitor	N1(CCC=C(C1)C(OC)=O)C.Br	300-08-3	10 mM	236.11	S2614	AChR	Arecoline is a muscarinic acetylcholine receptor agonist.
TAK-733	5-B4	0153715103	S-inhibitor	N1(C=NC2=C(C1=O)C(=C(C(N2C)=O)F)NC3=CC=C(C=C3F)I)C[C@@H](O)CO	1035555-63-5	10 mM	504.23	S2617	MEK	TAK-733 is a potent, selective, non ATP-competitive MEK inhibitor with IC50 of 3.2 nM.
LDN193189	5-B5	0153715058	S-inhibitor	C1(=CC=C(C=C1)C2C=NC3N(C=2)N=CC=3C4=CC=NC5=C4C=CC=C5)N6CCNCC6	1062368-24-4	10 mM	406.48	S2618	TGF-beta/Smad	LDN193189 is a selective inhibitor of ALK2 and ALK3 with IC50 of 5 nM and 30 nM, respectively.
GSK256066	5-B6	0153715063	S-inhibitor	C1=CC(=CC(=C1)S(C2=CC(=C3C(=C2)C(=C(C=N3)C(=O)N)NC4=CC(=CC=C4)OC)C)(=O)=O)C(N(C)C)=O	801312-28-7	10 mM	518.58	S2620	PDE	GSK256066 is a selective PDE4B inhibitor with IC50 of 3.2 pM.
AZD5438	5-B7	0153715048	S-inhibitor	C1=C(C=CC(=C1)NC2=NC=CC(=N2)C3=CN=C(N3C(C)C)C)S(=O)(C)=O	602306-29-6	10 mM	371.46	S2621	CDK	AZD5438 is a potent inhibitor of CDK1, CDK2 and CDK9 with IC50 of 16 nM, 6 nM, and 20 nM, respectively.
PP-121	5-B8	0153715077	S-inhibitor	C1(=CN=C2C(=C1)C=CN2)C3=NN(C4=C3C(=NC=N4)N)C5CCCC5	1092788-83-4	10 mM	319.36	S2622	DNA-PK	PP-121 is a multi-target inhibitor of PDGFR, Hck, mTOR, VEGFR2, Src and Abl with IC50 of 2 nM, 8 nM, 10 nM, 12 nM, 14 nM and 18 nM, respectively, and also inhibits DNA-PK with IC50 of 60 nM.
OSI-027	5-B9	0153715065	S-inhibitor	N1C=NN2C(C=1N)=C(N=C2[C@@H]3CC[C@H](CC3)C(=O)O)C4NC5=C(C=4)C=CC=C5OC	936890-98-1	10 mM	406.44	S2624	mTOR	OSI-027 is a selective and potent dual inhibitor of mTORC1 and mTORC2 with IC50 of 22 nM and 65 nM, respectively.
R788 (Fostamatinib)	5-B10	0153715049	S-inhibitor	C1(=C(C(=CC(=C1)NC2=NC=C(C(=N2)NC3=CC=C4C(=N3)N(C(C(O4)(C)C)=O)COP(O)(O)=O)F)OC)OC)OC	901119-35-5	10 mM	580.46	S2625	Syk	R788 (Fostamatinib) is a Syk inhibitor with IC50 of 41 nM.
LY2603618 (IC-83)	5-B11	0153715040	S-inhibitor	C1=C(C(=CC(=C1OC[C@@H]2CNCCO2)NC(NC3=CN=C(C=N3)C)=O)Br)C	911222-45-2	10 mM	436.3	S2626	Chk	LY2603618 (IC-83) is a selective Chk1 inhibitor with potential anti-tumor activity.
Tubastatin A HCl	5-C2	0153715022	S-inhibitor	C1(=C(C=CC(=C1)CN2C3=C(C4=C2C=CC=C4)CN(CC3)C)C(NO)=O).Cl	1310693-92-5	10 mM	371.86	S2627	HDAC	Tubastatin A is a potent HDAC6 inhibitor with IC50 of 15 nM.
PF-05212384 (PKI-587)	5-C3	0153715051	S-inhibitor	N1=C(N=C(N=C1N2CCOCC2)C3=CC=C(C=C3)NC(NC4=CC=C(C=C4)C(N5CCC(CC5)N(C)C)=O)=O)N6CCOCC6	1197160-78-3	10 mM	615.73	S2628	mTOR	PKI-587 is a highly potent dual inhibitor of PI3Kα, PI3Kγ and mTOR with IC50 of 0.4 nM, 5.4 nM and 1.6 nM, respectively.
PNU-120596	5-C4	0158618542	S-inhibitor	C1(=C(C=C(C(=C1)OC)Cl)NC(NC2=NOC(=C2)C)=O)OC	501925-31-1	10 mM	311.72	S2629	AChR	PNU-120596 is a positive allosteric modulator of α7 nAChR with EC50 of 216 nM in α7*-expressing SH-EP1 cells.
GW3965 HCl	5-C5	0153715078	S-inhibitor	C1(=C(C=C(C=C1)OCCCN(CC2=CC=CC(=C2Cl)C(F)(F)F)CC(C3=CC=CC=C3)C4=CC=CC=C4)CC(=O)O).Cl	405911-17-3	10 mM	618.51	S2630	Liver X Receptor	GW3965 is a potent, selective LXR agonist, which exhibits its potency in the LXRα/SRC1 LiSA and LXRα-GAL4 with EC50 of 125 nM and 190 nM, respectively.
URB597	5-C6	0158618532	S-inhibitor	C1=C(C=C(C=C1)OC(NC2CCCCC2)=O)C3=CC=CC(=C3)C(N)=O	546141-08-6	10 mM	338.4	S2631	FAAH	URB597 (KDS-4103) is a potent FAAH inhibitor with IC50 of 4.6 nM.
BMS-806 (BMS 378806)	5-C7	0158618554	S-inhibitor	C1=CNC2C(=C1OC)C(=CN=2)C(C(N3[C@@H](CN(CC3)C(=O)C4=CC=CC=C4)C)=O)=O	357263-13-9	10 mM	406.43	S2632	gp120/CD4	BMS-806 (BMS 378806) selectively inhibitis the binding of HIV-1 gp120 to the CD4 receptor with EC50 of 0.85-26.5 nM in virus.
DCC-2036 (Rebastinib)	5-C8	0153715060	S-inhibitor	C1(=C(C=C(C=C1)OC2=CC(=NC=C2)C(NC)=O)F)NC(NC3N(N=C(C=3)C(C)(C)C)C4=CC5=C(C=C4)N=CC=C5)=O	1020172-07-9	10 mM	553.59	S2634	Bcr-Abl	DCC-2036 is a conformational control inhibitor of Abl1 and Abl1(T315I) with IC50 of 0.8 nM and 4 nM, respectively.
CCT128930	5-C9	0153715024	S-inhibitor	N1=CN=C2C(=C1N3CCC(CC3)(N)CC4=CC=C(C=C4)Cl)C=CN2	885499-61-6	10 mM	341.84	S2635	Akt	CCT128930 is a potent, ATP-competitive and selective inhibitor of Akt2 with IC50 of 6 nM.
A66	5-C10	0153715019	S-inhibitor	C1SC(=NC=1C2SC(=NC=2C)NC(N3[C@@H](CCC3)C(=O)N)=O)C(C)(C)C	1166227-08-2	10 mM	393.53	S2636	PI3K	A66 is a potent and specific p110α inhibitor with IC50 of 32 nM.
TAK-875	5-C11	0153715026	S-inhibitor	C1(=C(C=C(C=C1)COC2=CC=C3C(=C2)OC[C@H]3CC(=O)O)C4=C(C=C(C=C4C)OCCCS(=O)(C)=O)C).O.C5=C(C=C(C=C5)COC6=CC=C7C(=C6)OC[C@H]7CC(=O)O)C8=C(C=C(C=C8C)OCCCS(=O)(C)=O)C	1374598-80-7	10 mM	533.63	S2637	GPR	TAK-875 is a selective GPR40 agonist with EC50 of 14 nM.
NU7441 (KU-57788)	5-D2	0153715039	S-inhibitor	C1=C(OC2=C(C1=O)C=CC=C2C3=CC=CC4=C3SC5=C4C=CC=C5)N6CCOCC6	503468-95-9	10 mM	413.49	S2638	DNA-PK	NU7441 is a highly potent and selective DNA-PK inhibitor with IC50 of 14 nM and also inhibits PI3K with IC50 of 5 μM.
SNX-2112	5-D3	0153715045	S-inhibitor	C1=CC(=CC(=C1C(N)=O)N[C@@H]2CC[C@H](CC2)O)N3N=C(C4=C3CC(CC4=O)(C)C)C(F)(F)F	908112-43-6	10 mM	464.48	S2639	HSP (e.g. HSP90)	SNX-2112 selectively binds to the ATP pocket of HSP90α and HSP90β with Ka of 30 nM and 30 nM, respectively.
PF-04929113 (SNX-5422)	5-D4	0153715034	S-inhibitor	N1(C2=C(C(=N1)C(F)(F)F)C(CC(C2)(C)C)=O)C3=CC=C(C(=C3)N[C@@H]4CC[C@H](CC4)OC(CN)=O)C(=O)N	908115-27-5	10 mM	521.53	S2656	HSP (e.g. HSP90)	PF-04929113 (SNX-5422) is a potent and selective HSP90 inhibitor with Kd of 41 nM and also inhibits Her-2 degradation with IC50 of 37 nM.
GSK2126458	5-D5	0153715029	S-inhibitor	C1(C(=CC(=CC=1)F)F)S(=O)(=O)NC2C(=NC=C(C=2)C3C=C4C(=CC=NC(=CC=3)4)C5C=NN=CC=5)OC	1086062-66-9	10 mM	505.5	S2658	mTOR	GSK2126458 is a highly selective and potent inhibitor of p110α, p110β, p110γ, p110δ, mTORC1 and mTORC2 with Ki of 0.019 nM, 0.13 nM, 0.024 nM, 0.06 nM, 0.18 nM and 0.3 nM, respectively.
5-hydroxymethyl tolterodine (PNU 200577)	5-D6	0158618533	S-inhibitor	C1=CC=CC=C1[C@H](C2=C(C=CC(=C2)CO)O)CCN(C(C)C)C(C)C	207679-81-0	10 mM	341.49	S2659	AChR	5-hydroxymethyl tolterodine (PNU 200577) is a new muscarinic receptor antagonist with Kb of 0.84 nM.
MK-0752	5-D7	0158618553	S-inhibitor	C1=CC(=CC=C1Cl)S([C@]2(CC[C@H](CC2)CCC(=O)O)C3=C(C=CC(=C3)F)F)(=O)=O	471905-41-6	10 mM	442.9	S2660	Beta Amyloid	MK-0752 is a moderately potent γ-secretase inhibitor, which reduces Aβ40 production with IC50 of 5 nM in human SH-SY5Y cells.
WYE-125132	5-D8	0153715036	S-inhibitor	C1(=NC(=NC2=C1C=NN2C3CCC4(CC3)OCCO4)C5=CC=C(C=C5)NC(=O)NC)N6CC7CCC(O7)C6	1144068-46-1	10 mM	519.6	S2661	mTOR	WYE-125132 is a highly potent, ATP-competitive and specific mTOR inhibitor with IC50 of 0.19 nM.
WAY-100635 HCl	5-D9	0158618578	S-inhibitor	C1(N2CCN(CC2)CCN(C3=CC=CC=N3)C(C4CCCCC4)=O)(=C(C=CC=C1)OC).Cl.Cl.Cl	146714-97-8	10 mM	531.95	S2663	5-HT Receptor	WAY 100635 is a potent and selective 5-HT agonist with IC50 of 0.95 nM.
Clinofibrate	5-D10	0153715013	S-inhibitor	C1CC(CCC1)(C2=CC=C(C=C2)OC(CC)(C)C(O)=O)C3=CC=C(C=C3)OC(CC)(C)C(=O)O	30299-08-2	10 mM	468.58	S2664	RAAS	Clinofibrate inhibits hydroxymethylglutaryl coenzyme A reductase (HMGCR) with IC50 of 0.47 mM.
PF-3845	5-D11	0158618510	S-inhibitor	C1(=CN=C(C=C1)OC2=CC(=CC=C2)CC3CCN(CC3)C(NC4=CN=CC=C4)=O)C(F)(F)F	1196109-52-0	10 mM	456.46	S2666	FAAH	PF-3845 is a potent, selective and irreversible FAAH inhibitor with Ki of 230 nM.
S/GSK1349572 (GSK1349572)	5-E2	0153715052	S-inhibitor	C1(=CC(=C(C=C1)CNC(C2=CN3C(=C(C2=O)O)C(N4[C@](C3)(OCC[C@@H]4C)[H])=O)=O)F)F	1051375-16-6	10 mM	419.38	S2667	Integrase	S/GSK1349572 (GSK1349572) is a two-metal-binding HIV integrase inhibitor with IC50 of 2.7 nM.
WYE-687	5-E3	0153715056	S-inhibitor	C1=C(C=CC(=C1)C2=NC3=C(C(=N2)N4CCOCC4)C=NN3C5CCN(CC5)CC6=CC=CN=C6)NC(OC)=O	1062161-90-3	10 mM	528.61	S2668	mTOR	WYE-687 is an ATP-competitive and selective inhibitor of mTOR with IC50 of 7 nM.
LY310762	5-E4	0158618590	S-inhibitor	C1(=CC=C2C(=C1)C(C(N2CCN3CCC(CC3)C(C4=CC=C(C=C4)F)=O)=O)(C)C).Cl	192927-92-7	10 mM	430.94	S2669	5-HT Receptor	LY310762 is a 5-HT1D antagonist with Ki of ~0.2 μM.
A-674563	5-E5	0153715031	S-inhibitor	C1=CC=CC(=C1)C[C@@H](COC2=CC(=CN=C2)C3=CC4=C(C=C3)NN=C4C)N	552325-73-2	10 mM	358.44	S2670	Akt	A-674563 inhibits Akt1, PKA and CDK2 with Ki of 11 nM, 16 nM and 46 nM, respectively.
PF-00562271	5-E6	0153715053	S-inhibitor	C1(=NC(=C(C=C1)CNC2=C(C=NC(=N2)NC3=CC=C4C(=C3)CC(N4)=O)C(F)(F)F)N(C)S(=O)(C)=O).C5=CC=CC(=C5)S(O)(=O)=O	939791-38-5	10 mM	665.66	S2672	FAK	PF-00562271 is the benzenesulfonate salt of PF-562271, which is a potent, ATP-competitive, reversible inhibitor of FAK and Pyk2 with IC50 of 1.5 nM and 14 nM, respectively.
GSK1120212 (Trametinib)	5-E7	0153715080	S-inhibitor	C1(N(C(=C2C(=C1C)N(C(N(C2=O)C3CC3)=O)C4=CC(=CC=C4)NC(C)=O)NC5=CC=C(C=C5F)I)C)=O	871700-17-3	10 mM	615.39	S2673	MEK	GSK1120212 (JTP-74057, trametinib) is a highly specific and potent MEK1 and MEK2 inhibitor with IC50 of 0.92 nM and 1.8 nM, respectively.
A 922500	5-E8	0153715008	S-inhibitor	C1=CC=C(C=C1)NC(NC2=CC=C(C=C2)C3=CC=C(C=C3)C(=O)[C@@H]4CCC[C@@H]4C(O)=O)=O	959122-11-3	10 mM	428.48	S2674	Transferase	A 922500 is a DGAT-1 inhibitor for human and mouse DGAT-1 with IC50 of 7 nM and 24 nM, respectively.
NSC-207895 (XI-006)	5-E9	0153715011	S-inhibitor	C1CN(CCN1C2C3C(C(=CC=2)[N+](=O)[O-])=NO[N+]=3[O-])C	58131-57-0	10 mM	279.25	S2678	DNA/RNA Synthesis	NSC-207895 suppresses MDMX with IC50 of 2.5 ¦ÌM, leading to enhanced p53 stabilization/activation and DNA damage, and also regulate MDM2, an E3 ligase
Flavopiridol (Alvocidib) HCl	5-E10	0158618528	S-inhibitor	C1(=C(C(=C2C(=C1O)C(C=C(O2)C3=C(C=CC=C3)Cl)=O)[C@@]4([C@@H](CN(CC4)C)O)[H])O).Cl	131740-09-5	10 mM	438.3	S2679	CDK	Flavopiridol competes with ATP to inhibit CDKs including CDK1, CDK2, CDK4 and CDK6 with IC50 of ~ 40 nM, and CDK7 with IC50 of 300 nM.
PCI-32765 (Ibrutinib)	5-E11	0153715010	S-inhibitor	C1=NC(=C2C(=N1)N(N=C2C3=CC=C(C=C3)OC4=CC=CC=C4)[C@H]5CN(CCC5)C(C=C)=O)N	936563-96-1	10 mM	440.5	S2680	BTK	PCI-32765 (Ibrutinib) is a potent and highly selective Btk inhibitor with IC50 of 0.5 nM.
AS-604850	5-F2	0153715009	S-inhibitor	C12=C(C=CC(=C1)/C=C3\SC(NC3=O)=O)OC(O2)(F)F	648449-76-7	10 mM	285.22	S2681	PI3K	AS-604850 is a selective, ATP-competitive PI3Kγ inhibitor with IC50 of 250 nM.
CAY10505	5-F3	0153714342	S-inhibitor	C1(=CC=C(C=C1)C2OC(=CC=2)/C=C3\C(NC(S3)=O)=O)F	1218777-13-9	10 mM	289.28	S2682	PI3K	CAY10505 is a PI3Kγ inhibitor with IC50 of 30 nM.
CHIR-124	5-F4	0153714343	S-inhibitor	C1(C(=C(C2=C(N1)C=CC(=C2)Cl)N[C@H]3C4CCN(C3)CC4)C5=NC6=C(N5)C=CC=C6)=O	405168-58-3	10 mM	419.91	S2683	Chk	CHIR-124 is a novel and potent Chk1 inhibitor with IC50 of 0.3 nM.
CX-5461	5-F5	0153714353	S-inhibitor	C1=C(N=C2C(=C1)C(C(=C3N2C4=C(S3)C=CC=C4)C(NCC5=CN=C(C=N5)C)=O)=O)N6CCN(CCC6)C	1138549-36-6	10 mM	513.61	S2684	DNA/RNA Synthesis	CX-5461 selectively inhibits Pol I-driven transcription of rRNA with IC50 of 142 nM in HCT-116 cells.
KW-2478	5-F6	0153714345	S-inhibitor	C1=C(C(=C(C(=C1O)C(C2=CC=C(C(=C2)OC)OCCN3CCOCC3)=O)CC(N(CCOC)CCOC)=O)CC)O	819812-04-9	10 mM	574.66	S2685	HSP (e.g. HSP90)	KW-2478 is a nonansamycin HSP90 inhibitor with IC50 of 3.8 nM.
NVP-BSK805 2HCl	5-F7	0153713283	S-inhibitor	C1(=CC=C2C(=C1C3=CC(=C(C(=C3)F)CN4CCOCC4)F)N=C(C=N2)C5=CN(N=C5)C6CCNCC6).Cl.Cl	1092499-93-8 (free base)	10 mM	563.47	S2686	JAK	NVP-BSK805 is a potent and selective ATP-competitive JAK2 inhibitor with IC50 of 0.5 nM.
R547	5-F8	0150550631	S-inhibitor	N1=C(N=CC(=C1N)C(C2=C(C(=CC=C2OC)F)F)=O)NC3CCN(CC3)S(=O)(C)=O	741713-40-6	10 mM	441.45	S2688	CDK	R547 is a potent and selective CDK inhibitor with Ki and IC50 of 1-3 nM and 80 nM respectively.
WAY-600	5-F9	0153714346	S-inhibitor	C12=C(C=CC(=C1)C3=NC4=C(C(=N3)N5CCOCC5)C=NN4C6CCN(CC6)CC7=CC=CN=C7)NC=C2	1062159-35-6	10 mM	494.59	S2689	mTOR	WAY-600 is a potent, ATP-competitive and selective inhibitor of mTOR with IC50 of 9 nM.
ADX-47273	5-F10	0153714348	S-inhibitor	C1(=CC=C(C=C1)C(N2CCC[C@@H](C2)C3=NC(=NO3)C4=CC=C(C=C4)F)=O)F	851881-60-2	10 mM	369.36	S2690	GluR	ADX47273 is a potent and specific mGlu5 antagonist with IC50 of 0.17μM.
TG101209	5-F11	0153714350	S-inhibitor	C1=C(C=C(C=C1)NC2=NC(=NC=C2C)NC3=CC=C(C=C3)N4CCN(CC4)C)S(NC(C)(C)C)(=O)=O	936091-14-4	10 mM	509.67	S2692	c-RET	TG101209 is a potent inhibitor of JAK2, Flt3 and RET with IC50 of 6 nM, 25 nM and 17 nM, respectively.
WAY-362450	5-G2	0150550654	S-inhibitor	C1=CC=C2C(=C1)C3=C(N2)C(=CN(CC3(C)C)C(C4=CC=C(C(=C4)F)F)=O)C(=O)OC(C)C	629664-81-9	10 mM	438.47	S2694	FXR	WAY-362450 is a potent, selective FXR agonist with EC50 of 4 nM.
GDC-0980 (RG7422)	5-G3	0153714370	S-inhibitor	C1(=CN=C(N=C1)N)C2=NC(=C3C(=N2)C(=C(S3)CN4CCN(CC4)C([C@@H](O)C)=O)C)N5CCOCC5	1032754-93-0	10 mM	498.6	S2696	mTOR	GDC-0980 (RG7422) is a potent, selective inhibitor of PI3Kα, PI3Kβ, PI3Kδ and PI3Kγ with IC50 of 5 nM, 27 nM, 7 nM, and 14 nM, and also a mTOR inhibitor with Ki of 17 nM.
A-769662	5-G4	0153714371	S-inhibitor	C1(=CC=C(C=C1)C2=CSC3=C2C(=C(C(N3)=O)C#N)O)C4=CC=CC=C4O	844499-71-4	10 mM	360.39	S2697	AMPK	A-769662 is a potent, reversible AMPK activator with EC50 of 0.8 μM and inhibits fatty acid synthesis with IC50 of 3.2 μM.
RS-127445	5-G5	0150550587	S-inhibitor	C1=CC(=C2C(=C1C3=CC(=NC(=N3)N)C(C)C)C=CC=C2)F	199864-87-3	10 mM	281.33	S2698	5-HT Receptor	RS-127445 is a selective 5-HT2B antagonist with pKi of 9.5 and pIC50 of 10.4.
CH5132799	5-G6	0153714396	S-inhibitor	N1=C(N=CC(=C1)C2=C3C(=NC(=N2)N4CCOCC4)N(CC3)S(C)(=O)=O)N	1007207-67-1	10 mM	377.42	S2699	mTOR	CH5132799 exhibits a strong inhibitory activity especially against PI3Kα with IC50 of 14 nM and also inhibits mTOR with IC50 of 1.6 µM.
KX2-391	5-G7	0153714372	S-inhibitor	C1=C(C=CC(=C1)C2=CC=C(N=C2)CC(NCC3=CC=CC=C3)=O)OCCN4CCOCC4	897016-82-9	10 mM	431.53	S2700	Src	KX2-391 (KX01) is a highly selective non ATP-competitive Src inhibitor with GI50 of 9-60 nM in cancer cell lines .
GSK1838705A	5-G8	0153714351	S-inhibitor	N1=C(N=C2C(=C1NC3=CC=CC(=C3C(=O)NC)F)C=CN2)NC4=C(C=C5C(=C4)N(CC5)C(=O)CN(C)C)OC	1116235-97-2	10 mM	532.57	S2703	ALK	GSK1838705A is a potent inhibitor of IGF-1R, IR and ALK with IC50 of 2.0 nM, 1.6 nM and 0.5 nM, respectively
LY2109761	5-G9	0153714395	S-inhibitor	C12=C(C=C(C=C1)OCCN3CCOCC3)N=CC=C2C4C(=NN5C=4CCC5)C6=NC=CC=C6	700874-71-1	10 mM	441.52	S2704	TGF-beta/Smad	LY2109761 is a novel selective TGF-β receptor type I/II (TβRI/II) dual inhibitor with Ki of 38 nM and 300 nM, respectively.
YO-01027	5-G10	0150550609	S-inhibitor	C1(=CC(=CC(=C1)CC(N[C@H](C(N[C@H]2C3=C(C4=C(N(C2=O)C)C=CC=C4)C=CC=C3)=O)C)=O)F)F	209984-56-5	10 mM	463.48	S2711	Gamma-secretase	YO-01027 (Dibenzazepine, DBZ) is a dipeptidic γ-secretase inhibitor with IC50 of 2.6 nM and 2.9 nM for APPL and Notch, respectively.
LY411575	5-G11	0153714394	S-inhibitor	C1(=CC(=CC(=C1)[C@@H](C(N[C@H](C(N[C@H]2C3=C(C4=C(N(C2=O)C)C=CC=C4)C=CC=C3)=O)C)=O)O)F)F	209984-57-6	10 mM	479.48	S2714	Gamma-secretase	LY-411575 is a potent γ-secretase inhibitor with IC50 of 0.078 nM and 0.082 nM for membrane- and cell-based γ-secretase.
CP-91149	5-H2	0153714397	S-inhibitor	C1(=CC=C2C(=C1)C=C(N2)C(N[C@H]([C@H](C(=O)N(C)C)O)CC3=CC=CC=C3)=O)Cl	186392-40-5	10 mM	399.87	S2717	Phosphorylase	CP-91149 is a selective glycogen phosphorylase (GP) inhibitor with IC50 of 0.13 μM.
TAK-901	5-H3	0153714421	S-inhibitor	C1N(CCC(C1)NC(C2=C(C3=C(C(=C2)C4=CC(=CC=C4)S(CC)(=O)=O)C5=C(N3)N=CC(=C5)C)C)=O)C	934541-31-8	10 mM	504.64	S2718	Aurora Kinase	TAK-901 is a novel inhibitor of Aurora A and Aurora B with IC50 of 21 nM and 15 nM, respectively.
AMG 900	5-H4	0153714374	S-inhibitor	C1=CC(=C(N=C1)OC2=CC=C(C=C2)NC3C4=C(C(=NN=3)C5SC=C(C=5)C)C=CC=C4)C6=NC(=NC=C6)N	945595-80-2	10 mM	503.58	S2719	Aurora Kinase	AMG 900 is a potent and highly selective pan-Aurora inhibitor for Aurora A, Aurora B and Aurora C with IC50 of 5 nM, 4 nM and 1 nM, respectively.
JTC-801	5-H5	0153714392	S-inhibitor	C1(=CC=C(C(=C1)C(=O)NC2=CC3=C(C=C2)N=C(C=C3N)C)COC4=CC=C(C=C4)CC).Cl	244218-51-7	10 mM	447.96	S2722	Opioid Receptor	JTC-801 is a selective opioid receptor-like1 (ORL1) receptor antagonist with IC50 of 94 nM.
PF-03814735	5-H6	0153714354	S-inhibitor	C12=C(C=C(C=C1)NC3=NC(=C(C=N3)C(F)(F)F)NC4CCC4)[C@@H]5CC[C@@H]2N5C(CNC(C)=O)=O	942487-16-3	10 mM	474.48	S2725	Aurora Kinase	PF-03814735 is a novel, potent and reversible inhibitor of both Aurora A and Aurora B with IC50 of 0.8 nM and 5 nM, respectively.
PH-797804	5-H7	0153714340	S-inhibitor	C1(=C(C=CC(=C1)C(=O)NC)C)N2C(=CC(=C(C2=O)Br)OCC3=CC=C(C=C3F)F)C	586379-66-0	10 mM	477.3	S2726	p38 MAPK	PH-797804 is a novel pyridinone inhibitor of p38α with IC50 of 26 nM.
Dacomitinib (PF299804,PF-00299804)	5-H8	0153714337	S-inhibitor	C(/C=C/C(NC1=C(C=C2C(=C1)C(=NC=N2)NC3=CC(=C(C=C3)F)Cl)OC)=O)N4CCCCC4	1110813-31-4	10 mM	469.94	S2727	EGFR	PF299804 is a potent, irreversible pan-ErbB inhibitor against ErbB1, ErbB2 and ErbB4 with IC50 of 6 nM, 45.7 nM and 73.7 nM, respectively.
Crenolanib (CP-868596)	5-H9	0153714390	S-inhibitor	C1=CC(=C2C(=C1)C=CC(=N2)N3C=NC4=C3C=CC(=C4)OCC5(COC5)C)N6CCC(CC6)N	670220-88-9	10 mM	443.54	S2730	PDGFR	Crenolanib (CP-868596) is a potent and selective inihibitor of PDGFRα with IC50 of 10 nM in PDGFRα over-expressed CHO cells.
AZ 3146	5-H10	0153714401	S-inhibitor	C1(=CC(=C(C=C1)NC2=NC3=C(C=N2)N(C(N3C4CCCC4)=O)C)OC)OC5CCN(CC5)C	1124329-14-1	10 mM	452.55	S2731	Kinesin	AZ3146 is a selective Mps1 inhibitor with IC50 of ~35 nM.
TG101348 (SAR302503)	5-H11	0153714416	S-inhibitor	C1(=CC=C(C=C1)NC2=NC(=C(C=N2)C)NC3=CC=CC(=C3)S(NC(C)(C)C)(=O)=O)OCCN4CCCC4	936091-26-8	10 mM	524.68	S2736	JAK	TG-101348 (SAR302503) is a selective inhibitor of JAK2 with IC50 of 3 nM.
PKI-402	6-A2	0153714415	S-inhibitor	C12=C(N=C(N=C1N3CCOCC3)C4=CC=C(C=C4)NC(NC5=CC=C(C=C5)C(N6CCN(CC6)C)=O)=O)N(N=N2)CC	1173204-81-3	10 mM	570.65	S2739	PI3K	PKI-402 is a potent dual PI3K/mTOR inhibitor targeting PI3Kα, PI3Kβ, PI3Kγ, PI3Kδ and mTOR with IC50 of 2 nM, 7 nM, 16 nM, 14 nM, and 3 nM, respectively.
GSK1070916	6-A3	0153714423	S-inhibitor	C1=CN=C2C(=C1C3=CN(N=C3C4=CC=C(C=C4)NC(N(C)C)=O)CC)C=C(N2)C5=CC=CC(=C5)CN(C)C	942918-07-2	10 mM	507.63	S2740	Aurora Kinase	GSK1070916 is a reversible and ATP-competitive inhibitor of Aurora B and Aurora C with IC50 of 3.5 nM and 6.5 nM, respectively.
PHA-767491	6-A4	0153714402	S-inhibitor	C1=NC=CC(=C1)C2NC3=C(C=2)C(NCC3)=O	845714-00-3	10 mM	213.24	S2742	CDK	PHA-767491 is a potent ATP-competitive dual Cdc7/CDK9 inhibitor with IC50 of 10 nM and 34 nM, respectively.
PF-04691502	6-A5	0153714414	S-inhibitor	N1=C(N=C2C(=C1C)C=C(C(N2[C@H]3CC[C@@H](CC3)OCCO)=O)C4=CC=C(N=C4)OC)N	1013101-36-4	10 mM	425.48	S2743	Akt	PF-04691502 is an ATP-competitive, selective inhibitor of PI3K(α/β/δ/γ)/mTOR with Ki of 1.8 nM/2.1 nM/1.6 nM/1.9 nM and 16 nM, also inhibits Akt phosphorylation on T308/S473 with IC50 of 7.5 nM/3.8 nM.
CCT137690	6-A6	0153714424	S-inhibitor	C1(=CN=C2C(=C1N3CCN(CC3)CC4C=C(ON=4)C)N=C(N2)C5=CC=C(C=C5)N6CCN(CC6)C)Br	1095382-05-0	10 mM	551.48	S2744	Aurora Kinase	CCT137690 is a highly selective inhibitor of Aurora A, Aurora B and Aurora C with IC50 of 15 nM, 25 nM and 19 nM, respectively.
CHIR-98014	6-A7	0153714376	S-inhibitor	C1=C(C=C(C(=C1)C2=NC(=NC=C2N3C=CN=C3)NCCNC4=CC=C(C(=N4)N)[N+](=O)[O-])Cl)Cl	252935-94-7	10 mM	486.31	S2745	GSK-3	CHIR-98014 is a potent and selective GSK-3 inhibitor for GSK-3ɑ and GSK-3β with IC50 of 0.65 nM and 0.58 nM, respectively.
AZ628	6-A8	0153714389	S-inhibitor	C1(=CC=CC(=C1)C(NC2=CC=C(C(=C2)NC3=CC4=C(C=C3)N=CN(C4=O)C)C)=O)C(C#N)(C)C	878739-06-1	10 mM	451.52	S2746	Raf	AZ628 is a potent inhibitor for wild-type CRAF and BRAFV600E with IC50 of 29 nM and 34 nM, respectively.
AMG458	6-A9	0153714377	S-inhibitor	N1(N(C(C(=C1C)C(=O)NC2C=CC(=CN=2)OC3C=CN=C4C=C(C=CC=34)OC)=O)C5C=CC=CC=5)CC(C)(C)O	913376-83-7	10 mM	539.58	S2747	c-Met	AMG 458 is a potent c-Met inhibitor of human c-Met and mouse c-Met with Ki of 1.2 nM or 2.0 nM.
Anacetrapib (MK-0859)	6-A10	0153714417	S-inhibitor	C1=C(C=C(C(=C1)C2=CC(=C(C=C2OC)F)C(C)C)CN3C(O[C@@H]([C@H]3C)C4=CC(=CC(=C4)C(F)(F)F)C(F)(F)F)=O)C(F)(F)F	875446-37-0	10 mM	637.51	S2748	CETP	Anacetrapib (MK0859) is a potent and selective rhCETP and mutant CETP(C13S) inhibitor with IC50 of 7.9 nM and 11.8 nM, respectively
NVP-BGT226	6-A11	0153714355	S-inhibitor	C(/C=C\C(=O)O)(=O)O.N1=CC2=C(C3=CC(=CC=C13)C4C=NC(=CC=4)OC)N(C(N2C)=O)C5C=C(C(=CC=5)N6CCNCC6)C(F)(F)F	1245537-68-1	10 mM	650.6	S2749	mTOR	NVP-BGT226 is a novel dual PI3K/mTOR inhibitor with IC50 of 1 nM.
GW788388	6-B2	0153714365	S-inhibitor	C(C1C=CC(=CC=1)C2C=C(C=CN=2)C3C(=NNC=3)C4C=CC=CN=4)(=O)NC5CCOCC5	452342-67-5	10 mM	425.48	S2750	TGF-beta/Smad	GW788388 is a potent and selective inhibitor of ALK5 with IC50 of 18 nM.
Milciclib (PHA-848125)	6-B3	0153714403	S-inhibitor	C12CC(C3=C(C(=NC(=NC=1)NC4=CC=C(C=C4)N5CCN(CC5)C)2)N(N=C3C(NC)=O)C)(C)C	802539-81-7	10 mM	460.57	S2751	CDK	PHA-848125 is a potent, ATP-competitive cyclin A/CDK2 inhibitor with IC50 of 45 nM.
Arry-380	6-B4	0153714426	S-inhibitor	N1C=NC(=C2C=C(C=CC=12)C3OC(=CC=3)CNCCS(=O)(=O)C)NC4C=C(C(=CC=4)OC5=CC6N(C=C5)N=CN=6)C	937265-83-3	10 mM	569.63	S2752	EGFR	ARRY-380 is a potent and selective HER2 inhibitor with IC50 of 8 nM and also inhibits EGFR with IC50 of 4 μM.
AT-406	6-B5	0153714413	S-inhibitor	C1=CC(=CC=C1)C(C2=CC=CC=C2)NC(=O)[C@@H]3CC[C@H]4N3C([C@H](CN(CC4)C(CC(C)C)=O)NC([C@H](C)NC)=O)=O	1071992-99-8	10 mM	561.71	S2754	E3 Ligase	AT-406 is a potent IAP (inhibitor of apoptosis protein via E3 ubiquitin ligase) inhibitor of XIAP, cIAP1, and cIAP2 with Ki of 66.4 nM, 1.9 nM, and 5.1 nM, respectively.
ARRY334543	6-B6	0153714388	S-inhibitor	C12=C(C(=NC=N1)NC3=CC(=C(C=C3)OCC4SC=CN=4)Cl)C=C(C=C2)NC5OC[C@H](N=5)C	845272-21-1	10 mM	466.94	S2755	EGFR	ARRY334543 is a selective and potent ErbB1 and ErbB2 inhibitor with IC50 of 7 nM and 2 nM, respectively.
PI3K/HDAC Inhibitor I	6-B7	0153714379	S-inhibitor	C1=NC(=NC=C1C(NO)=O)N(C)CC2=CC3=C(S2)C(=NC(=N3)C4=CC=C(N=C4)OC)N5CCOCC5	1339928-25-4	10 mM	508.55	S2759	HDAC	PI3K/HDAC Inhibitor I is a dual PI3K and HDAC inhibitor for PI3Kɑ, HDAC1, HDAC2, HDAC3 and HDAC10 with IC50 of 19 nM, 1.7 nM, 5 nM, 1.8 nM and 2.8 nM, respectively.
Canagliflozin	6-B8	0153714380	S-inhibitor	[C@H]1([C@H]([C@@H]([C@H]([C@@H](O1)C2=CC(=C(C=C2)C)CC3SC(=CC=3)C4=CC=C(C=C4)F)O)O)O)CO	842133-18-0	10 mM	444.52	S2760	SGLT	Canagliflozin is a highly potent and selective SGLT2 inhibitor for CHO-hSGLT2, CHO-rSGLT2 and CHO-mSGLT2 with IC50 of 4.4 nM, 3.7 nM and 2 nM, respectively.
NVP-BVU972	6-B9	0153714393	S-inhibitor	C1C(=NN2C(C=1)=NC=C2CC3=CC=C4C(=C3)C=CC=N4)C5C=NN(C=5)C	1185763-69-2	10 mM	340.38	S2761	c-Met	NVP-BVU972 is a selective and potent Met inhibitor with IC50 of 14 nM.
CH5424802	6-B10	0153714362	S-inhibitor	C1(=CC=C2C(=C1)NC3=C2C(C4=C(C3(C)C)C=C(C(=C4)CC)N5CCC(CC5)N6CCOCC6)=O)C#N	1256580-46-7	10 mM	482.62	S2762	ALK	CH5424802 is a potent and selective ALK inhibitor with IC50 of 1.9 nM.
MK-2048	6-B11	0153714364	S-inhibitor	N1N(C(C2=C(C=1C(=O)NC)N3C(=C2O)C(N(C[C@H]3C)CC)=O)=O)CC4=CC=C(C(=C4)Cl)F	869901-69-9	10 mM	461.87	S2765	Integrase	MK-2048 is an potent inhibitor of integrase (IN) and INR263K with IC50 of 2.6 nM and 1.5 nM, respectively.
Dinaciclib (SCH727965)	6-C2	0153714412	S-inhibitor	C1C[C@H](N(CC1)C2C=C(N3C(N=2)=C(C=N3)CC)NCC4=CC=C[N+](=C4)[O-])CCO	779353-01-4	10 mM	396.49	S2768	CDK	Dinaciclib (SCH727965) is a novel and potent CDK inhibitor for CDK2, CDK5, CDK1 and CDK9 with IC50 of 1 nM, 1 nM, 3 nM and 4 nM, respectively.
Dovitinib Dilactic acid (TKI258 Dilactic acid)	6-C3	0153714404	S-inhibitor	N1(C(C(=C(C2C(=CC=CC1=2)F)N)C3=NC4C(N3)=CC(=CC=4)N5CCN(CC5)C)=O).CC(C(O)=O)O.CC(C(O)=O)O	852433-84-2	10 mM	572.59	S2769	c-Kit	Dovitinib (TKI258, CHIR-258) is a multitargeted tyrosine kinase inhibitor of FLT3 and c-KIT with IC50 of 1 nM and 2 nM, respectively.
MK-5108 (VX-689)	6-C4	0153714341	S-inhibitor	N1=C(C=CC=C1C[C@]2(CC[C@H](CC2)OC3=C(C(=CC=C3)Cl)F)C(=O)O)NC4SC=CN=4	1010085-13-8	10 mM	461.94	S2770	Aurora Kinase	MK-5108 (VX-689) is a highly selective Aurora A inhibitor with IC50 of 0.064 nM.
Dalcetrapib (JTT-705)	6-C5	0153714339	S-inhibitor	C1=CC=CC(=C1NC(C2(CCCCC2)CC(CC)CC)=O)SC(C(C)C)=O	211513-37-0	10 mM	389.59	S2772	CETP	Dalcetrapib (JTT-705) is a rhCETP inhibitor with IC50 of 0.2 μM.
SB705498	6-C6	0153714356	S-inhibitor	N(C(=O)N[C@H]1CN(CC1)C2C=CC(=CN=2)C(F)(F)F)C3C(=CC=CC=3)Br	501951-42-4	10 mM	429.23	S2773	TRPV	SB705498 is a TRPV1 antagonist for hTRPV1 with pIC50 and pKi of 7.1 and 7.6 in HEK293 cells.
MK-2461	6-C7	0153714367	S-inhibitor	C12=C(C(C3=C(C=C1)C=CC(=C3)NS(N(C[C@H]4OCCOC4)C)(=O)=O)=O)C=C(C=N2)C5=CN(N=C5)C	917879-39-1	10 mM	495.55	S2774	c-Met	MK-2461 is a potent inhibitor of c-Met, Ron, Flt1/3, PDGFRβ, Mer and FGFR1/2/3 with IC50 of 2.5 nM, 7 nM, 10 nM/22 nM, 22 nM, 24 nM and 65 nM/39 nM/50 nM, respectively.
CPI-613	6-C8	0153714391	S-inhibitor	S(CCC(SCC1=CC=CC=C1)CCCCC(O)=O)CC2=CC=CC=C2	95809-78-2	10 mM	388.59	S2776	Dehydrogenase	CPI-613 inhibits mitochondrial enzymes pyruvate dehydrogenase (PDH) and α-ketoglutarate dehydrogenase.
PF-5274857	6-C9	0153714344	S-inhibitor	C1(=CC(=C(N=C1)C2=CC(=NC=C2Cl)N3CCN(CC3)C(=O)CCS(C)(=O)=O)C)C	1373615-35-0	10 mM	436.96	S2777	Smoothened	PF-5274857 is a potent and selective Smoothened (Smo) antagonist with IC50 and Ki of 5.8 nM and 4.6 nM, respectively.
GW842166X	6-C10	0153714338	S-inhibitor	C1(N=C(C(=CN=1)C(=O)NCC2CCOCC2)C(F)(F)F)NC3C(=CC(=CC=3)Cl)Cl	666260-75-9	10 mM	449.25	S2778	Cannabinoid Receptor	GW842166X is a potent and highly selective agonist of CB2 receptor.
M344	6-C11	0153714387	S-inhibitor	C1(=CC=C(C=C1)C(NCCCCCCC(NO)=O)=O)N(C)C	251456-60-7	10 mM	307.39	S2779	HDAC	M344 is a potent HDAC inhibitor with IC50 of 100 nM.
GW4064	6-D2	0153714386	S-inhibitor	C1=CC=C(C=C1C(=O)O)/C=C/C2=C(C=C(C=C2)OCC3C(=NOC=3C(C)C)C4=C(C=CC=C4Cl)Cl)Cl	278779-30-9	10 mM	542.84	S2782	FXR	GW 4064 is an agonist of farnesoid X receptor (FXR) with EC50 of 65 nM.
AZD2014	6-D3	0153714405	S-inhibitor	C1=C(N=C2C(=C1)C(=NC(=N2)N3[C@H](COCC3)C)N4[C@H](COCC4)C)C5=CC(=CC=C5)C(NC)=O	1009298-59-2	10 mM	462.54	S2783	mTOR	AZD2014 is a novel dual mTORC1 and mTORC2 inhibitor with potential antineoplastic activity.
TAK-285	6-D4	0153714411	S-inhibitor	C12=C(C(=NC=N1)NC3=CC=C(C(=C3)Cl)OC4=CC=CC(=C4)C(F)(F)F)N(C=C2)CCNC(=O)CC(O)(C)C	871026-44-7	10 mM	547.96	S2784	EGFR	TAK-285 is a novel dual HER2 and EGFR inhibitor with IC50 of 17 nM and 23 nM, respectively.
A-803467	6-D5	0153714428	S-inhibitor	O1C(=CC=C1C2C=CC(=CC=2)Cl)C(=O)NC3C=C(C=C(C=3)OC)OC	944261-79-4	10 mM	357.79	S2785	Sodium Channel	A-803467 is a selective NaV1.8 channel blocker with IC50 of 8 nM.
INCB28060	6-D6	0153714406	S-inhibitor	C(C1C(=CC(=CC=1)C2C=NC3N(N=2)C(=CN=3)CC4C=C5C=CC=NC(=CC=4)5)F)(=O)NC	1029712-80-8	10 mM	412.42	S2788	c-Met	INCB28060 is a novel, ATP-competitive inhibitor of c-MET with IC50 of 0.13 nM.
Tofacitinib (CP-690550, Tasocitinib)	6-D7	0153714381	S-inhibitor	N1=CN=C2C(=C1N(C)[C@H]3CN(CC[C@@H]3C)C(=O)CC#N)C=CN2	477600-75-2	10 mM	312.37	S2789	JAK	CP-690550 is a novel inhibitor of JAK3 with IC50 of 1 nM.
Istradefylline (KW-6002)	6-D8	0153714361	S-inhibitor	N1(C(=NC2N(C(N(C(C1=2)=O)CC)=O)CC)/C=C/C3C=C(C(=CC=3)OC)OC)C	155270-99-8	10 mM	384.43	S2790		Istradefylline (KW-6002) is a selective adenosine A2A receptor (A2AR) antagonist with Ki of 2.2 nM.
Sotrastaurin (AEB071)	6-D9	0153714410	S-inhibitor	N1C(C(=C(C1=O)C2N=C(N=C3C=CC=CC=23)N4CCN(CC4)C)C5=CNC6C=CC=CC5=6)=O	425637-18-9	10 mM	438.48	S2791	PKC	Sotrastaurin (AEB071) is a potent selective pan-PKC inhibitor and highly inhibits PKCθ with Ki of 0.22 nM.
Torcetrapib (CP-529414)	6-D10	0153714382	S-inhibitor	C12=C(N([C@@H](C[C@H]1N(C(=O)OC)CC3=CC(=CC(=C3)C(F)(F)F)C(F)(F)F)CC)C(OCC)=O)C=CC(=C2)C(F)(F)F	262352-17-0	10 mM	600.47	S2792	CETP	Torcetrapib (CP-529414) is a CETP inhibitor with IC50 of 37 nM.
VU 0357121	6-D11	0153714383	S-inhibitor	C1=C(C=CC(=C1)C(NC2=C(C=C(C=C2)F)F)=O)OCCCC	433967-28-3	10 mM	305.32	S2795	GluR	VU0357121 is a novel allosteric modulator of mGlu5 with EC50 of 33 nM.
WP1066	6-E2	0153714409	S-inhibitor	C(/C(=C/C1C=CC=C(N=1)Br)C#N)(=O)N[C@@H](C)C2C=CC=CC=2	857064-38-1	10 mM	356.22	S2796	JAK	WP1066 is a novel inhibitor of JAK2 and STAT3 with IC50 of 2.30 μM and 2.43 μM in HEL cells .
Lonafarnib (SCH66336)	6-E3	0153714385	S-inhibitor	C1CC2=C([C@H](C3=C1C=C(C=N3)Br)C4CCN(CC4)C(CC5CCN(CC5)C(N)=O)=O)C(=CC(=C2)Cl)Br	193275-84-2	10 mM	638.82	S2797	Transferase	Lonafarnib (SCH 66336) is a selectively FPTase inhibitor for H-ras, K-ras-4B and N-ras with IC50 of 1.9 nM, 5.2 nM and 2.8 nM, respectively.
APO866 (FK866)	6-E4	0150550596	S-inhibitor	C(/C=C/C1C=NC=CC=1)(=O)NCCCCC2CCN(CC2)C(C3C=CC=CC=3)=O	658084-64-1	10 mM	391.51	S2799		APO866 effectively inhibits NAMPT with IC50 of 0.09 nM.
AZD4547	6-E5	0153714430	S-inhibitor	C1(=CC(=CC(=C1)CCC2=CC(=NN2)NC(=O)C3=CC=C(C=C3)N4C[C@@H](N[C@@H](C4)C)C)OC)OC	1035270-39-3	10 mM	463.57	S2801	FGFR	AZD4547 is a novel selective FGFR inhibitor targeting FGFR1, FGFR2, and FGFR3 with IC50 of of 0.2 nM, 2.5 nM, and 1.8 nM, respectively.
BAY80-6946	6-E6	0153714427	S-inhibitor	C(NC1=NC2C(C3N1CCN=3)=CC=C(C=2OC)OCCCN4CCOCC4)(=O)C5=CN=C(N=C5)N	1032568-63-0	10 mM	480.52	S2802	PI3K	BAY 80-6946 is a potent and highly selective reversible PI3K inhibitor for PI3Kα and PI3Kβ with IC50 of 0.469 nM and 3.72 nM, respectively.
Galeterone (TOK-001)	6-E7	0153714399	S-inhibitor	[C@]12(C(C3C(CC1)[C@@]4(C(=CC3)C[C@H](CC4)O)C)CC=C2N5C6=C(N=C5)C=CC=C6)C	851983-85-2	10 mM	388.55	S2803	Androgen Receptor	Galeterone (TOK-001, VN/124-1) is a selective CYP17 inhibitor and androgen receptor (AR) antagonist with IC50 of 300 nM and 384 nM, respectively.
CEP33779	6-E8	0158616971	S-inhibitor	C1(=CC=CC(=C1)NC2N=C3N(N=2)C=CC=C3C4=CC=C(C=C4)S(=O)(C)=O)N5CCN(CC5)C	1257704-57-6	10 mM	462.57	S2806	JAK	CEP33779 is a selective JAK2 inhibitor with IC50 of 1.8 nM.
Dabrafenib (GSK2118436)	6-E9	0158617045	S-inhibitor	C1(C(=CC=CC=1F)F)S(=O)(=O)NC2C(=C(C=CC=2)C3N=C(SC=3C4=NC(=NC=C4)N)C(C)(C)C)F	1195765-45-7	10 mM	519.56	S2807	Raf	Dabrafenib (GSK2118436) is a potent ATP-competitive inhibitor of B-Raf, B-RafV600E and c-Raf with IC50 of 3.2 nM, 0.8 nM and 5.0 nM, respectively.
GDC-0068	6-E10	0158616994	S-inhibitor	C1CN(CCN1C([C@@H](C2=CC=C(C=C2)Cl)CNC(C)C)=O)C3=C4C(=NC=N3)[C@H](C[C@H]4C)O	1001264-89-6	10 mM	458	S2808	Akt	GDC-0068 is a highly selective pan-Akt inhibitor targeting Akt1, Akt2 and Akt3 with IC50 of 5 nM, 18 nM and 8 nM, respectively.
INK 128 (MLN0128)	6-E11	0158616996	S-inhibitor	N1=CN=C2C(=C1N)C(=NN2C(C)C)C3=CC4=C(C=C3)OC(=N4)N	1224844-38-5	10 mM	309.33	S2811	mTOR	INK 128 is a potent and selective mTOR inhibitor with IC50 of 1 nM.
AT101	6-F2	0158616970	S-inhibitor	C1(C(=C(C=C2C(=C(C(=C(C=12)C=O)O)O)C(C)C)C)C3=C(C4C(=C(C(=C(C(C=C3C)=4)C(C)C)O)O)C=O)O)O.C(C)(=O)O	90141-22-3	10 mM	578.61	S2812	Bcl-2	AT-101 is a BH3 mimetic known to be a potent inhibitor of antiapoptotic Bcl-2 family members.
Ciproxifan	6-F3	0158616973	S-inhibitor	C(=O)(C1C=CC(=CC=1)OCCCC2N=CNC=2)C3(CC3).C(/C=C\C(=O)O)(=O)O	184025-19-2	10 mM	386.4	S2813	Histamine Receptor	Ciproxifan is a highly potent and selective H3-receptor antagonist with IC50 of 9.2 nM.
BYL719	6-F4	0158616972	S-inhibitor	N1([C@@H](CCC1)C(=O)N)C(=O)NC2SC(=C(N=2)C)C3=CC(=NC=C3)C(C(F)(F)F)(C)C	1217486-61-7	10 mM	441.47	S2814	PI3K	BYL719 strongly and selectively inhibits PI3Kα.
Torin 2	6-F5	0158617018	S-inhibitor	N1(C(C=CC2C=NC3C(C1=2)=CC(=CC=3)C4C=NC(=CC=4)N)=O)C5C=C(C=CC=5)C(F)(F)F	1223001-51-1	10 mM	432.4	S2817	ATM/ATR	Torin 2 is a highly potent and selective mTOR inhibitor with IC50 of 0.25 nM, and also exhibits potent cellular activity against ATM/ATR/DNA-PK with EC50 of 28 nM, 35 nM and 118 nM, respectively.
NVP-TAE226	6-F6	0158616993	S-inhibitor	C1(=CC(=C(C=C1)NC2=NC(=C(C=N2)Cl)NC3=C(C=CC=C3)C(NC)=O)OC)N4CCOCC4	761437-28-9	10 mM	468.94	S2820	FAK	NVP-TAE226, a potent dual FAK/IGF-1R, inhibiting FAK and IGF-1R with IC50 of 5.5 nM and 0.14 μM, respectively.
RG108	6-F7	0158616969	S-inhibitor	[C@@](N1C(C2=CC=CC=C2C1=O)=O)(CC3C4=C(NC=3)C=CC=C4)(C(O)=O)[H]	48208-26-0	10 mM	334.33	S2821	DNA Methyltransferase	RG108 is an inhibitor of DNA methyltransferase with IC50 of 115 nM.
Tideglusib	6-F8	0158616998	S-inhibitor	S1N(C(N(C1=O)CC2C=CC=CC=2)=O)C3C=CC=C4C=CC=CC=34	865854-05-3	10 mM	334.39	S2823	GSK-3	Tideglusib (NP031112, NP-12) is a potent non ATP-competitive inhibitor of GSK3 with IC50 of 60 nM.
ML133 HCl	6-F9	0158617017	S-inhibitor	C1(=CC2=C(C=C1)C(=CC=C2)CNCC3=CC=C(C=C3)OC).Cl	1222781-70-5	10 mM	313.82	S2825	Potassium Channel	ML133 is a potent potassium channel inhibitor for Kir2.1 with IC50 of 1.8 μM (pH 7.4) and 290 nM (pH 8.5).
Desmethyl Erlotinib (CP-473420)	6-F10	0158617047	S-inhibitor	C1=C(C=CC=C1NC2=NC=NC3=C2C=C(C(=C3)OCCOC)OCCO)C#C	183321-86-0	10 mM	379.41	S2826	EGFR	Desmethyl Erlotinib (CP-473420) is a free base of OSI-420, which is an active metabolite of Erlotinib which is an orally active EGFR inhibitor for human EGFR with IC50 of 2 nM.
Torin 1	6-F11	0158616968	S-inhibitor	N1(C(C=CC2C=NC3C(C1=2)=CC(=CC=3)C4C=NC5=CC=CC=C(C=4)5)=O)C6C=C(C(=CC=6)N7CCN(CC7)C(CC)=O)C(F)(F)F	1222998-36-8	10 mM	607.62	S2827	Autophagy	Torin1 is a potent inhibitor of mTOR with IC50 of 2-10 nM.
JNJ 1661010	6-G2	0158616975	S-inhibitor	N1(CCN(CC1)C(=O)NC2=CC=CC=C2)C3=NC(=NS3)C4=CC=CC=C4	681136-29-8	10 mM	365.45	S2828	FAAH	JNJ-1661010 is a potent and selective FAAH inhibitor with IC50 of 10 nM (rat) and 12 nM (human).
ARN-509	6-G3	0158616573	S-inhibitor	S=C1N(C(C2(N1C3=CC=C(C(=C3)F)C(NC)=O)CCC2)=O)C4=CN=C(C(=C4)C(F)(F)F)C#N	956104-40-8	10 mM	477.43	S2840	Adrenergic Receptor	ARN-509 is a selective androgen receptor inhibitor with IC50 of 16 nM.
Semaxanib (SU5416)	6-G4	0158617046	S-inhibitor	C1=CC=C2C(=C1)/C(C(N2)=O)=C/C3NC(=CC=3C)C	194413-58-6	10 mM	238.28	S2845	VEGFR	Semaxanib (SU5416) is a potent and selective VEGFR (Flk-1/KDR) inhibitor with IC50 of 1.04 μM.
Cathepsin Inhibitor 1	6-G5	0158617023	S-inhibitor	N1(N=C(C=C1C(=O)N[C@H](C(=O)NCC#N)CC2C=C(C=CC=2)Cl)C(C)(C)C)C	225120-65-0	10 mM	401.89	S2847		Cathepsin Inhibitor 1 is an inhibitor of Cathepsin (L, L2, S, K, B) with pIC50 of 7.9, 6.7, 6.0, 5.5 and 5.2, respectively.
SB-269970 HCl	6-G6	0158616999	S-inhibitor	N1([C@H](CCC1)CCN2CCC(CC2)C)S(=O)(=O)C3(C=C(C=CC=3)O).Cl	261901-57-9	10 mM	388.95	S2849	5-HT Receptor	SB-269970 HCl is a hydrochloride salt form of SB-269970, which is a 5-HT7 receptor antagonist with pKi of 8.3.
Baricitinib (LY3009104, INCB28050)	6-G7	0158616976	S-inhibitor	N1(CC(C1)(CC#N)N2N=CC(=C2)C3C4=C(N=CN=3)NC=C4)S(=O)(=O)CC	1187594-09-7	10 mM	371.42	S2851	JAK	Baricitinib is a selective JAK1 and JAK2 inhibitor with IC50 of 5.9 nM and 5.7 nM, respectively.
Carfilzomib (PR-171)	6-G8	0158616991	S-inhibitor	C1CN(CCO1)CC(N[C@H](C(N[C@H](C(N[C@H](C(N[C@H](C([C@@]2(OC2)C)=O)CC(C)C)=O)CC3=CC=CC=C3)=O)CC(C)C)=O)CCC4=CC=CC=C4)=O	868540-17-4	10 mM	719.91	S2853	Proteasome	Carfilzomib (PR-171) is a proteasome inhibitor with IC50 less than 5 nM.
MRS 2578	6-G9	0158617042	S-inhibitor	C(NC1=CC(N=C=S)=CC=C1)(=S)NCCCCNC(NC2=CC(N=C=S)=CC=C2)=S	711019-86-2	10 mM	472.67	S2855	P2 Receptor	MRS2578 is a potent P2Y6 receptor with IC50 of 37 nM.
SB 271046	6-G10	0158617020	S-inhibitor	C12C(C(=C(S1)S(=O)(=O)NC3C=C(C(=CC=3)OC)N4CCNCC4)C)=CC(=CC=2)Cl	209481-20-9	10 mM	451.99	S2856	5-HT Receptor	SB-271046 is a potent, selective and orally active 5-HT6 receptor antagonist with pKi of 8.9.
Dizocilpine (MK 801)	6-G11	0158617024	S-inhibitor	C12=C([C@]3(C4=C([C@@H](C1)N3)C=CC=C4)C)C=CC=C2	77086-21-6	10 mM	221.3	S2857	GluR	Dizocilpine is a potent N-methyl-D-aspartate (NMDA) receptor antagonist with Ki of 30.5 nM.
StemRegenin 1	6-H2	0158617015	S-inhibitor	C1(C=CC(=CC=1)CCNC2=NC(=NC3N(C=NC2=3)C(C)C)C4C5C(SC=4)=CC=CC=5)O	1227633-49-9	10 mM	429.54	S2858		StemRegenin 1 is an AhR inhibitor with IC50 of 127 nM.
Golvatinib (E7050)	6-H3	0158616967	S-inhibitor	C1=C(C=CC(=C1F)NC(C2(C(NC3=CC=C(C=C3)F)=O)CC2)=O)OC4=CC(=NC=C4)NC(N5CCC(CC5)N6CCN(CC6)C)=O	928037-13-2	10 mM	633.69	S2859	c-Met	E7050 is a dual c-Met and VEGFR-2 inhibitor with IC50 of 14 nM and 16 nM, respectively.
IEM 1754 dihydrobroMide	6-H4	0158617001	S-inhibitor	C(CCCCNCC12CC3CC(C1)CC(C2)C3)N.Br.Br	162831-31-4	10 mM	412.25	S2860	5-HT Receptor	IEM 1754 dihydrobroMide is a selective AMPA/kainate receptor blockers for GluR1 and GluR3 with IC50 of 6 μM.
CTEP	6-H5	0158616966	S-inhibitor	C1(=CC=NC(=C1)Cl)C#CC2N=C(N(C=2C)C3=CC=C(C=C3)OC(F)(F)F)C	871362-31-1	10 mM	391.77	S2861	GluR	CTEP is a selective allosteric antagonist of mGlu5 receptor with IC50 of 2.2 nM.
VU 0364770	6-H6	0158617039	S-inhibitor	C1(C=CC=CN=1)C(=O)NC2C=C(C=CC=2)Cl	61350-00-3	10 mM	232.67	S2862	GluR	VU 0364770 is a selective positive allosteric mGlu4 with EC50 of 1.1 μM.
ML130	6-H7	0158617014	S-inhibitor	C1=CC=C2C(=C1)N(C(=N2)N)S(=O)(C3=CC=C(C=C3)C)=O	799264-47-4	10 mM	287.34	S2863	NOD1	ML130 is a potent and selective inhibitor of NOD1 with IC50 of 0.56 μM.
VUF 10166	6-H8	0158617048	S-inhibitor	C1=CC=C2C(=C1)N=C(C(=N2)Cl)N3CCN(CC3)C	155584-74-0	10 mM	262.74	S2865	5-HT Receptor	VUF10166 is a novel, potent and competitive antagonist to 5-HT3A with Ki of 0.04 nM.
U-104	6-H9	0158616992	S-inhibitor	N(C(NC1=CC=C(C=C1)S(N)(=O)=O)=O)C2=CC=C(C=C2)F	178606-66-1	10 mM	309.32	S2866	Carbonic Anhydrase	U-104 is a potent carbonic anhydrase (CA) inhibitor for CA IX and CA XII with IC50 of 45.1 nM and 4.5 nM, respectively.
Alogliptin (SYR-322)	6-H10	0158616990	S-inhibitor	C(C1C(=CC=CC=1)CN2C(=CC(N(C2=O)C)=O)N3CCC[C@H](C3)N)#N	850649-61-5	10 mM	339.39	S2868	DPP-4	Alogliptin(SYR-322) is a potent, selective inhibitor of DPP-4 with IC50 of < 10 nM.
TG 100713	6-H11	0158616965	S-inhibitor	C1(C=C(C=CC=1)C2=NC3=C(N=C(N=C(N=C2)3)N)N)O	925705-73-3	10 mM	254.25	S2870	PI3K	TG 100713 is a PI3K inhibitor for PI3Kγ, PI3Kδ, PI3Kα and PI3Kβ with IC50 of 50 nM, 24 nM, 165 nM and 215 nM, respectively.
Camostat Mesilate (FOY-305)	7-A2	0158617025	S-inhibitor	C1(C(OC2C=CC(=CC=2)CC(OCC(N(C)C)=O)=O)=O)(C=CC(=CC=1)NC(N)=N).S(C)(O)(=O)=O	59721-29-8	10 mM	494.52	S2874	HCV Protease	Camostat is a trypsin-like protease inhibitor, inhibiting matriptase and human neutrophil elastase with IC50 of 0.5 μM and 0.2 μM, respectively.
Prucalopride	7-A3	0158617026	S-inhibitor	C1(C2=C(CCO2)C(=C(C=1)Cl)N)C(NC3CCN(CC3)CCCOC)=O	179474-81-8	10 mM	367.87	S2875	5-HT Receptor	Prucalopride is a selective, high affinity 5-HT receptor agonistfor 5-HT4a and 5-HT4b with Ki of 2.5 nM and 8 nM, respectively.
IKK-16	7-A4	0158617037	S-inhibitor	C1(C=CC(=CC=1)NC2N=C(C=CN=2)C3=CC4C(S3)=CC=CC=4)C(=O)N5CCC(CC5)N6CCCC6	873225-46-8	10 mM	483.63	S2882	IκB/IKK	IKK 16 is a selective IκB kinase (IKK) inhibitor for IKK-2, IKK complex and IKK-1 with IC50 of 40 nM, 70 nM and 200 nM, respectively.
PF-562271	7-A5	0158616979	S-inhibitor	C1=NC(=C(C=C1)CNC2=C(C=NC(=N2)NC3=CC=C4C(=C3)CC(N4)=O)C(F)(F)F)N(C)S(=O)(=O)C	717907-75-0	10 mM	507.49	S2890	FAK	PF-562271 is a potent, ATP-competitive, reversible inhibitor of FAK and Pyk2 with IC50 of 1.5 nM and 14 nM, respectively.
SB-742457	7-A6	0158617003	S-inhibitor	C1C=CC=CC=1S(C2C=NC3C(=CC=CC=3C=2)N4CCNCC4)(=O)=O	607742-69-8	10 mM	353.44	S2894	5-HT Receptor	SB-742457 is a highly selective 5-HT6 receptor antagonist with pKi of 9.63.
ZM 323881 HCl	7-A7	0158617012	S-inhibitor	C1(C(=CC(=C(C=1)NC2N=CN=C3C=C(C=CC=23)OCC4C=CC=CC=4)F)C)O.Cl	193000-39-4	10 mM	411.86	S2896	VEGFR	ZM-323881 is a potent and selective inhibitor of VEGFR2 with IC50 < 2 nM.
ZM 306416	7-A8	0158616987	S-inhibitor	C12C(C=C(C(=C1)OC)OC)=NC=NC=2NC3=C(C=C(C=C3)Cl)F	690206-97-4	10 mM	333.74	S2897	VEGFR	ZM-306416 is a VEGFR inhibitor, inhibiting Src, VEGFR1 and Abl with IC50 of 0.33 μM, 0.33 μM and 1.3 μM, respectively.
Cobicistat (GS-9350)	7-A9	0158617027	S-inhibitor	C1(CN(C(N[C@H](C(N[C@H](CC[C@@H](NC(OCC2=CN=CS2)=O)CC3=CC=CC=C3)CC4=CC=CC=C4)=O)CCN5CCOCC5)=O)C)=CSC(=N1)C(C)C	1004316-88-4	10 mM	776.02	S2900	P450 (e.g. CYP17)	Cobicistat (GS-9350) is a potent and selective inhibitor of CYP3A with IC50 of 30-285 nM.
CCG 50014	7-A10	0158617052	S-inhibitor	C1(=CC=C(C=C1)CN2C(N(SC2=O)C3=CC=C(C=C3)C)=O)F	883050-24-6	10 mM	316.35	S2901		CCG 50014 is a potent and selective inhibitor of RGS4 with IC50 of 30 nM.
S-Ruxolitinib	7-A11	0158617006	S-inhibitor	N1C2=C(C(=NC=1)C3=CN(N=C3)[C@H](C4CCCC4)CC#N)C=CN2	941685-37-6	10 mM	306.37	S2902	JAK	S-Ruxolitinib is a JAK family inhibitor for JAK1 and JAK2 with IC50 of 3.3 nM and 2.8 nM, respectively.
PF 477736	7-B2	0158617028	S-inhibitor	C1=C(C=C2C3=C1C(NN=CC(=C(N2)C4C=NN(C=4)C)3)=O)NC([C@@H](C5CCCCC5)N)=O	952021-60-2	10 mM	419.48	S2904	Chk	PF 477736 is a ChK inhibitor against ChK1, ChK2, VEGFR2, Yes and Fms with IC50 of 0.49 nM, 47 nM, 8 nM, 14 nM and 10 nM, respectively.
JNJ-7777120	7-B3	0158617051	S-inhibitor	C1(=CC=C2C(=C1)C=C(N2)C(N3CCN(CC3)C)=O)Cl	459168-41-3	10 mM	277.75	S2905	Histamine Receptor	JNJ-7777120 is a potent and selective non-imidazole histamine H4 receptor antagonist with Ki of 4.5 nM.
Ki16198	7-B4	0158617013	S-inhibitor	C1=CC(=CC=C1C2=C(C(=NO2)C)NC(OC(C3=C(C=CC=C3)Cl)C)=O)CSCCC(OC)=O	355025-13-7	10 mM	488.98	S2906	LPA Receptor	Ki16198 is the methyl ester of Ki16425, which is a LPA antagonist and inhibits LPA1- and LPA3-induced inositol phosphate production with Ki of 0.34 μM and 0.93 μM, respectively.
WZ 811	7-B5	0158617030	S-inhibitor	C1(C=CC(=CC=1)CNC2C=CC=CN=2)CNC3C=CC=CN=3	55778-02-4	10 mM	290.36	S2912	CXCR	WZ811 is a highly potent competitive CXCR4 antagonist with EC50 of 0.3 nM.
Dapivirine	7-B6	0158617007	S-inhibitor	N1=C(N=CC=C1NC2C(=CC(=CC=2C)C)C)NC3=CC=C(C#N)C=C3	244767-67-7	10 mM	329.4	S2914	Reverse Transcriptase	Dapivirine is an nonnucleoside reverse transcriptase inhibitor for HIV reverse transcriptase with IC50 of 24 nM.
HC-030031	7-B7	0158616981	S-inhibitor	C12N(C=NC(N(C(N(C1=O)C)=O)C)=2)CC(NC3C=CC(=CC=3)C(C)C)=O	349085-38-7	10 mM	355.39	S2918		HC-030031 is a selective TRPA1 channel blocker that antagonizes AITC- and formalin-evoked calcium influx with IC50 of 6.2 μM and 5.3 μM respectively.
IOX2	7-B8	0158617035	S-inhibitor	C(CNC(=O)C1C(N(C2C=CC=CC(C=1O)=2)CC3C=CC=CC=3)=O)(=O)O	931398-72-0	10 mM	352.34	S2919	HIF	IOX2 is a potent inhibitor of HIF-1α prolyl hydroxylase-2 (PHD2) with IC50 of 21 nM.
Mozavaptan	7-B9	0158617010	S-inhibitor	C12=C(C(CCCN1C(C3=CC=C(C=C3)NC(C4=C(C=CC=C4)C)=O)=O)N(C)C)C=CC=C2	137975-06-5	10 mM	427.54	S2920	Vasopressin Receptor	Mozavaptan (OPC-31260) is a novel competitive vasopressin receptor antagonist for both V1 and V2 receptors with IC50 of 1.2 μM and 14 nM, respectively.
PF-4981517	7-B10	0150549299	S-inhibitor	C1(C2C3C(=NC=NC=3N4C[C@@H](N5CCCCC5)CC4)N(N=2)C)=C(N(C)N=C1)C6=CC=C(C=C6)C	1390637-82-7	10 mM	456.59	S2921	P450 (e.g. CYP17)	PF-4981517 is a potent and selective inhibitor of CYP3A4 (P450) with IC50 of 0.03 μM.
Icotinib	7-B11	0158617005	S-inhibitor	C1=C(C=CC=C1NC2=NC=NC3=C2C=C4C(=C3)OCCOCCOCCO4)C#C	610798-31-7	10 mM	391.42	S2922	EGFR	Icotinib is a potent and specific epidermal growth factor receptor (EGFR) tyrosine kinase inhibitor (TKI) with IC50 of 5 nM.
CHIR-99021 (CT99021) HCl	7-C2	0158616982	S-inhibitor	C1(=NC=C(C(=N1)C2=CC=C(C=C2Cl)Cl)C3NC=C(N=3)C)NCCNC4(=NC=C(C=C4)C#N).Cl	252917-06-9 (free base)	10 mM	501.8	S2924	GSK-3	CHIR-99021 HCl (CT99021) is hydrochloride of CHIR-99021, which is a GSK-3α and GSK-3β inhibitor with IC50 of 10 nM and 6.7 nM, respectively.
Evacetrapib (LY2484595)	7-C3	0150549226	S-inhibitor	C1(=CC(=CC(=C1)CN([C@]2(CCCN(C3=C2C=C(C=C3C)C)C[C@]4(CC[C@@](CC4)(C(O)=O)[H])[H])[H])C5N=NN(N=5)C)C(F)(F)F)C(F)(F)F	1186486-62-3	10 mM	638.65	S2925	CETP	LY2484595 is a potent and selective inhibitor of CETP with IC50 of 5.5 nM.
TDZD-8	7-C4	0158616962	S-inhibitor	S1N(C(N(C1=O)CC2C=CC=CC=2)=O)C	327036-89-5	10 mM	222.26	S2926	GSK-3	TDZD-8 is a non-ATP competitive GSK-3β inhibitor with IC50 of 2 μM.
TAK 715	7-C5	0150549276	S-inhibitor	C(C1C=CC=CC=1)(=O)NC2C=C(C=CN=2)C3=C(N=C(S3)CC)C4C=C(C=CC=4)C	303162-79-0	10 mM	399.51	S2928	p38 MAPK	TAK 715 is a p38 MAPK inhibitor for p38α with IC50 of 7.1 nM.
Rivaroxaban (Xarelto)	7-C6	0150549251	S-inhibitor	C1=C(C=CC(=C1)N2C(COCC2)=O)N3C(OC(C3)CNC(C4SC(=CC=4)Cl)=O)=O	366789-02-8	10 mM	435.88	S3002	Factor Xa	Rivaroxaban (Xarelto, BAY 59-7939) is a direct inhibitor of Factor Xa with Ki and IC50 of 0.4 nM and 0.7 nM, respectively.
Zaltoprofen	7-C7	0150549910	S-inhibitor	C1=CC=C2C(=C1)C(CC3=C(S2)C=CC(=C3)C(C)C(=O)O)=O	74711-43-6	10 mM	298.36	S3008	COX	Zaltoprofen is an inhibitor of Cox-1 and Cox-2 for treatment of arthritis._x000D_
Rimonabant (SR141716)	7-C8	0158616636	S-inhibitor	N1(N=C(C(=C1C2C=CC(=CC=2)Cl)C)C(=O)NN3CCCCC3)C4C(=CC(=CC=4)Cl)Cl	168273-06-1	10 mM	463.79	S3021	Cannabinoid Receptor	Rimonabant is a selective antagonist of CB1 with IC50 of 13.6 nM and EC50 of 17.3 nM in hCB1 transfected HEK 293 membrane.
PMSF (Phenylmethylsulfonyl Fluoride)	7-C9	0158616638	S-inhibitor	C1(C=CC=CC=1)CS(=O)(=O)F	329-98-6	10 mM	174.19	S3025		PMSF (Phenylmethyl sulfonyl fluoride) is an irreversible serine/cysteine protease inhibitor.
Vildagliptin (LAF-237)	7-C11	0158616633	S-inhibitor	C1N([C@@H](CC1)C#N)C(CNC23CC4CC(C2)CC(C3)(C4)O)=O	274901-16-5	10 mM	303.4	S3033	DPP-4	Vildagliptin (LAF-237) inhibits DPP−4 with IC50 of 2.3 nM.
Sitaxentan sodium (TBC-11251)	7-D2	0158616639	S-inhibitor	C1(=C(C=CS1)S(=O)(=O)[N-]C2=C(C(=NO2)C)Cl)C(=O)CC3(C=C4OCOC4=CC=3C).[Na+]	210421-74-2	10 mM	476.89	S3034	Endothelin Receptor	Sitaxentan sodium (TBC-11251) is a selective endothelin receptor-A antagonist with IC50 and Ki of 1.4 nM and 0.43 nM, respectively.
Bepotastine Besilate	7-D3	0158616631	S-inhibitor	N1(CCC(CC1)O[C@H](C2C=CC=CN=2)C3C=CC(=CC=3)Cl)CCCC(=O)O.C4=CC(=CC=C4)S(O)(=O)=O	190786-44-8	10 mM	547.06	S3037	Histamine Receptor	Bepotastine is a non-sedating, selective antagonist of histamine 1 (H1) receptor with pIC50 of 5.7.
Fosaprepitant dimeglumine	7-D4	0158616632	S-inhibitor	C1(=CC=C(C=C1)F)[C@H]2([C@H](OCCN2CC3=NN(C(N3)=O)P(O)(=O)O)O[C@@H](C4=CC(=CC(=C4)C(F)(F)F)C(F)(F)F)C).CNC[C@@H]([C@H]([C@@H]([C@@H](CO)O)O)O)O.CNC[C@@H]([C@H]([C@@H]([C@@H](CO)O)O)O)O	265121-04-8	10 mM	1004.83	S3038		Fosaprepitant (MK-0517, L-758,298) is a water-soluble phosphoryl prodrug for Aprepitant which is a NK1 antagonist.
Lurasidone HCl	7-D5	0158616616	S-inhibitor	N1(CCN(CC1)C2=NSC3=C2C=CC=C3)C[C@H]4([C@H](CN5C([C@]6([C@@]7(CC[C@]([C@]6(C5=O)[H])(C7)[H])[H])[H])=O)CCCC4).Cl	367514-88-3	10 mM	529.14	S3044	Dopamine Receptor	Lurasidone is an atypical antipsychotic, inhibits Dopamine D2, 5-HT2A, 5-HT7, 5-HT1A and noradrenaline α2C with IC50 of 1.68 nM, 2.03 nM, 0.495 nM, 6.75 nM and 10.8 nM, respectively.
Azilsartan (TAK-536)	7-D6	0158616642	S-inhibitor	C1(=NC2C(N1CC3C=CC(=CC=3)C4C(=CC=CC=4)C5NOC(N=5)=O)=C(C=CC=2)C(=O)O)OCC	147403-03-0	10 mM	456.45	S3046	RAAS	Azilsartan (TAK-536) is an angiotensin II type 1 (AT1) receptor antagonist with IC50 of 2.6 nM.
Otilonium Bromide	7-D7	0158616651	S-inhibitor	C(COC(C1C=CC(=CC=1)NC(C2C(=CC=CC=2)OCCCCCCCC)=O)=O)[N+](C)(CC)CC.[Br-]	26095-59-0	10 mM	563.57	S3047	AChR	Otilonium bromide is an antimuscarinic.
Bosentan Hydrate	7-D8	0158616628	S-inhibitor	C1(C=CC(=CC=1)C(C)(C)C)S(=O)(=O)NC2(=NC(=NC(=C2OC3C(=CC=CC=3)OC)OCCO)C4N=CC=CN=4).O	157212-55-0	10 mM	569.63	S3051	Endothelin Receptor	Bosentan is an endothelin (ET) receptors antagonist for ET-A and ET-B with Ki of 4.7 nM and 95 nM, respectively.
Rupatadine Fumarate	7-D9	0158616643	S-inhibitor	C12(C(=CC=CN=1)CCC3C(C2=C4CCN(CC4)CC5C=NC=C(C=5)C)=CC=C(C=3)Cl).C(/C=C/C(=O)O)(=O)O	182349-12-8	10 mM	532.03	S3052	Histamine Receptor	Rupatadine is an inhibitor of PAFR and histamine (H1) receptor with Ki of 550 and 102 nM, respectively.
Azelnidipine	7-D10	0158616564	S-inhibitor	C1(=C(C(C(=C(N1)C)C(=O)OC(C)C)C2C=C(C=CC=2)[N+](=O)[O-])C(=O)OC3CN(C3)C(C4C=CC=CC=4)C5C=CC=CC=5)N	123524-52-7	10 mM	582.65	S3053	Calcium Channel	Azelnidipine is a dihydropyridine calcium channel blocker.
Azilsartan Medoxomil (TAK-491)	7-D11	0150549964	S-inhibitor	C1(=NC2C(N1CC3C=CC(=CC=3)C4C(=CC=CC=4)C5NOC(N=5)=O)=C(C=CC=2)C(=O)OCC6OC(OC=6C)=O)OCC	863031-21-4	10 mM	568.53	S3057	RAAS
Medetomidine HCl	7-E2	0158616634	S-inhibitor	C1(=C(C(C)=CC=C1)C)C(C2N=CNC=2)C.Cl	86347-15-1	10 mM	236.74	S3060	Adrenergic Receptor
(R)-baclofen	7-E3	0158616627	S-inhibitor	C1=C(C=CC(=C1)[C@@H](CC(O)=O)CN)Cl	69308-37-8	10 mM	213.66	S3072	GABA Receptor	(R)-baclofen is a derivative of gamma-aminobutyric acid primarily used to treat spasticity.
Dexmedetomidine	7-E4	0150549929	S-inhibitor	C1=C(C(=C(C=C1)C)C)[C@@H](C2NC=NC=2)C	113775-47-6	10 mM	200.28	S3075	Adrenergic Receptor	Dexmedetomidine is a sedative medication used by intensive care units and anesthetists.
Etravirine (TMC125)	7-E5	0158616641	S-inhibitor	C1(N=C(N=C(C=1Br)N)NC2C=CC(C#N)=CC=2)OC3C(=CC(C#N)=CC=3C)C	269055-15-4	10 mM	435.28	S3080	Reverse Transcriptase	Etravirine (TMC125) is a non-nucleoside reverse transcriptase inhibitor (NNRTI) used for the treatment of HIV.
Ulipristal	7-E6	0158616612	S-inhibitor	[C@H]1(C2[C@]([C@]3([C@](C1)([C@@](CC3)(C(=O)C)OC(C)=O)C)[H])(CCC4C=2CCC(C=4)=O)[H])C5=CC=C(C=C5)N(C)C	126784-99-4	10 mM	475.62	S3081		Ulipristal is a selective SPRM for emergency contraception after an unprotected intercourse or contraceptive failure.
Indacaterol Maleate	7-E7	0158616615	S-inhibitor	N1(C(C=CC2C(=CC=C(C1=2)O)[C@H](CNC3CC4C=C(C(=CC(C3)=4)CC)CC)O)=O).C(/C(=O)O)=C\C(=O)O	753498-25-8	10 mM	508.56	S3083	Adrenergic Receptor	Indacaterol is an ultra-long-acting β-adrenoceptor agonist with pKi of 7.36.
Betahistine 2HCl	7-E8	0158616586	S-inhibitor	C1(C=CC=CN=1)CCNC.Cl.Cl	5579-84-0	10 mM	209.12	S3176	Histamine Receptor	Betahistine is a histamine H3 receptors inhibitor with IC50 of 1.9 μM.
Adrenalone HCl	7-E9	0150549936	S-inhibitor	O=C(CNC)C1(C=CC(O)=C(O)C=1).Cl	62-13-5	10 mM	217.65	S3185	Adrenergic Receptor	Adrenalone is an adrenergic agonist used as a topical vasoconstrictor and hemostatic, mainly acts on alpha-1 adrenergic receptors.
Cabozantinib malate	7-E10	0150549943	S-inhibitor	C12(=C(C(=CC=N1)OC3=CC=C(C=C3)NC(C4(C(NC5=CC=C(C=C5)F)=O)CC4)=O)C=C(C(=C2)OC)OC).C(C[C@H](O)C(=O)O)(=O)O	1140909-48-3	10 mM	635.59	S4001	Axl	Cabozantinib malate is the malate of Cabozantinib, a potent VEGFR2 inhibitor with IC50 of 0.035 nM and also inhibits c-Met, Ret, Kit, Flt-1/3/4, Tie2, and AXL with IC50 of 1.3 nM, 4 nM, 4.6 nM, 12 nM/11.3 nM/6 nM, 14.3 nM and 7 nM, respectively.
Sitagliptin phosphate monohydrate	7-E11	0150549944	S-inhibitor	C1(=C(C(=CC(=C1F)C[C@H](CC(N2CC3N(CC2)C(=NN=3)C(F)(F)F)=O)N)F)F).P(=O)(=O)OO.[HH].O	654671-77-9	10 mM	523.32	S4002	DPP-4	Sitagliptin phosphate (MK-0431) is a potent inhibitor of DPP-IV with IC50 of 19 nM in Caco-2 cell extracts.
Pentamidine HCl	7-F2	0158616596	S-inhibitor	C1(C=CC(=CC=1)OCCCCCOC2C=CC(=CC=2)C(N)=N)C(N)=N.Cl.Cl	50357-45-4	10 mM	413.34	S4007		Pentamidine is an inhibitor of <i>PRL Phosphatases</i> and also inhibits synthesis of DNA, RNA and protein.
Mirabegron (YM178)	7-F3	0158616625	S-inhibitor	S1C(=NC(=C1)CC(=O)NC2C=CC(=CC=2)CCNC[C@@H](C3C=CC=CC=3)O)N	223673-61-8	10 mM	396.51	S4009	Adrenergic Receptor	Mirabegron is a selective β3-adrenoceptor agonist with EC50 of 22.4 nM.
Avanafil	7-F4	0158616623	S-inhibitor	C(NCC1N=CC=CN=1)(=O)C2=C(NCC3=CC(=C(C=C3)OC)Cl)N=C(N4[C@H](CO)CCC4)N=C2	330784-47-9	10 mM	483.95	S4019	PDE	Avanafil is a highly selective PDE5 inhibitor with IC50 of 1 nM.
Procaine (Novocaine) HCl	7-F5	0158616683	S-inhibitor	C1(C(OCCN(CC)CC)=O)(C=CC(=CC=1)N).Cl	51-05-8	10 mM	272.77	S4023	Sodium Channel	Procaine (Novocaine) HCl is an inhibitor of sodium channel, NMDA receptor and nAChR with IC50 of 60 μM, 0.296 mM and 45.5 μM, which is also an inhibitor of 5-HT3 with KD of 1.7 μM.
Aclidinium Bromide	7-F6	0158616687	S-inhibitor	C(C(O[C@H]1C[N+]2(CCCOC3C=CC=CC=3)CCC1(CC2)[H])=O)(C4SC=CC=4)(C5SC=CC=5)O.[Br-]	320345-99-1	10 mM	564.55	S4031	AChR	Aclidinium Bromide inhibits human muscarinic AChR M1, M2, M3, M4 and M5 with Ki of 0.1 nM, 0.14 nM, 0.14 nM, 0.21 nM and 0.16 nM, respectively.
Sodium Nitrite	7-F8	0158616569	S-inhibitor	[O-]N=O.[Na+]	7632-00-0	10 mM	69	S4074		Sodium nitrite is a myeloperoxidase inhibitor with IC50 of 1.3 μM.
Ticagrelor	7-F9	0150551681	S-inhibitor	N1(C2=C(C(N[C@H]3[C@@H](C4=CC(F)=C(C=C4)F)C3)=NC(=N2)SCCC)N=N1)[C@H]5[C@@H]([C@@H](O)[C@H](C5)OCCO)O	274693-27-5	10 mM	522.57	S4079	P2 Receptor	Ticagrelor is the first reversibly binding oral P2Y12 receptor antagonist, also inhibits CYP2C9 and 4-hydroxylation with IC50 of 10.5 μM and 8.2 μM respectively._x000D_
Sulfacetamide Sodium	7-F10	0150551669	S-inhibitor	C1(=C(C=CC(=C1)S([N-]C(C)=O)(=O)=O)N).[Na+]	127-56-0	10 mM	236.22	S4081	Autophagy	Sulfacetamide Sodium is an anti-biotic.
Lorcaserin HCl	7-F11	0150551706	S-inhibitor	C1(NC[C@@H](C2=C(C1)C=CC(=C2)Cl)C).Cl	846589-98-8	10 mM	232.15	S4109	5-HT Receptor	Lorcaserin HCl is a selective full agonist of human 5-HT2C receptor with Ki of 15 nM.
Terbutaline Sulfate	7-G2	0150551671	S-inhibitor	C1(C(CNC(C)(C)C)O)(C=C(C=C(C=1)O)O).C2(C(CNC(C)(C)C)O)(C=C(C=C(C=2)O)O).S(O)(O)(=O)=O	23031-32-5	10 mM	548.65	S4127	Adrenergic Receptor	Terbutaline Sulfate is a selective β2-adrenergic receptor agonist with IC50 of 53 nM.
Deoxyarbutin	7-G3	0150551695	S-inhibitor	C1=C(C=CC(=C1)OC2CCCCO2)O	53936-56-4	10 mM	194.23	S4132		DeoxyArbutin is a reversible tyrosinase inhibitor, inhibiting tyrosinase activity with IC50 of 50 nM.
Tofacitinib citrate (CP-690550 citrate)	7-G4	0158616698	S-inhibitor	N1(=CN=C2C(=C1N(C)[C@H]3CN(CC[C@@H]3C)C(=O)CC#N)C=CN2).C(C(C(O)=O)(CC(=O)O)O)C(O)=O	540737-29-9	10 mM	504.49	S5001	JAK	Tofacitinib citrate (CP-690550) is a potent JAK3 inhibitor with IC50 of 1 nM.
Fingolimod (FTY720)	7-G5	0158616692	S-inhibitor	C1(=CC=C(C=C1)CCCCCCCC)CCC(CO)(N)CO.Cl	162359-56-0	10 mM	343.9	S5002	Bcr-Abl	FTY720 (Fingolimod, Gilenya) is a S1P antagonist with IC50 of 0.033 nM.
LY2140023 (LY404039)	7-G6	0158616723	S-inhibitor	[C@@]12([C@@]([C@](CS1(=O)=O)(N)C(=O)O)([H])[C@]2(C(=O)O)[H])[H]	635318-55-7	10 mM	235.22	S6001	GluR	LY404039 is a potent agonist of recombinant human mGlu2, mGlu3 receptors and rat neurons expressing native mGlu2/3 receptors with Ki of 149 nM, 92 nM and 88 nM, respectively.
PTC124 (Ataluren)	7-G7	0158616696	S-inhibitor	C1=C(C=CC=C1C(=O)O)C2=NOC(=N2)C3=CC=CC=C3F	775304-57-9	10 mM	284.24	S6003	CFTR	PTC124 (Ataluren) is a potent nonsense mutation inhibitor with EC50 of ~0.1 μM.
IPI-145 (INK1197)	7-G8	0150551676	S-inhibitor	C1=CC=C2C(=C1Cl)C(N(C(=C2)[C@H](C)NC3=NC=NC4=C3N=CN4)C5=CC=CC=C5)=O	1201438-56-3	10 mM	416.86	S7028	PI3K	IPI-145 (INK1197) is a novel and selective PI3K δ/γ inhibitor with Ki and IC50 of 23 pM/243 pM and 1 nM/50 nM.
AZD2461	7-G9	0150551652	S-inhibitor	C1=CC=C2C(=C1)C(NN=C2CC3=CC=C(C(=C3)C(N4CCC(CC4)OC)=O)F)=O	1174043-16-3	10 mM	395.43	S7029	PARP	AZD2461 is a poor P-glycoprotein substrate with lower affinity for Pgp than does olaparib.
PD168393	7-G10	0150551701	S-inhibitor	C1=C(C=C2C(=C1)N=CN=C2NC3=CC=CC(=C3)Br)NC(C=C)=O	194423-15-9	10 mM	369.22	S7039	EGFR
Oprozomib (ONX 0912)	7-G11	0150551653	S-inhibitor	N([C@H](C(N[C@H](C(N[C@H](C(C1(OC1)C)=O)CC2=CC=CC=C2)=O)COC)=O)COC)C(C3=CN=C(S3)C)=O	935888-69-0	10 mM	532.61	S7049	Proteasome	Oprozomib (ONX 0912) selectively inhibits CT-L activity of 20S proteasome β5/LMP7 with IC50 of 36 nM/82 nM.
VX-661	7-H2	0150551623	S-inhibitor	C12=CC=C(C=C1OC(O2)(F)F)C3(C(=O)NC4=C(C=C5C(=C4)C=C(N5C[C@H](CO)O)C(CO)(C)C)F)CC3	1152311-62-0	10 mM	520.5	S7059	CFTR	VX-661 is a second F508del CFTR corrector and is believed to help CFTR protein reach the cell surface.
GSK J4 HCl	7-H3	0158616681	S-inhibitor	C1(C2=C(CCN(C1)C3=NC(=NC(=C3)NCCC(OCC)=O)C4=CC=CC=N4)C=CC=C2).Cl	1373423-53-0(free base)	10 mM	453.96	S7070	Histone demethylases	GSK J4 HCl is a cell permeable prodrug of GSK J1, which is the first selective inhibitor of the H3K27 histone demethylase JMJD3/UTX with IC50 of 60 nM.
Cilengitide (EMD 121974, NSC 707544)	7-H4	0150551650	S-inhibitor	N1(C([C@H](NC([C@@H](NC(=O)CNC([C@@H](NC([C@@H]1C(C)C)=O)CCCNC(=N)N)=O)CC(=O)O)=O)CC2=CC=CC=C2)=O)C	188968-51-6	10 mM	588.66	S7077	Integrin	Cilengitide (EMD 121974, NSC 707544) is a potent integrin inhibitor for αvβ3 receptor and αvβ5 receptor with IC50 of 4.1 nM and 79 nM, respectively.
KY02111	7-H5	0150551631	S-inhibitor	C1(C=C(C(=CC=1)OC)OC)CCC(=O)NC2SC3C(N=2)=CC=C(C=3)Cl	1118807-13-8	10 mM	376.86	S7096	Wnt/beta-catenin	KY02111 promotes differentiation of hPSCs to cardiomyocytes by inhibiting Wnt signaling.
(−)-Blebbistatin	7-H6	0158616739	S-inhibitor	C1(C=CC=CC=1)N2C3[C@](C(C4C(=CC=C(C=4)C)N=3)=O)(CC2)O	856925-71-8	10 mM	292.33	S7099	ATPase	(-)-Blebbistatin is a selective cell-permeable inhibitor of non-muscle myosin II ATPases with IC50 from 0.5-5 μM.
AMG-517	7-H7	0150551673	S-inhibitor	C1(=CC=C(C=C1)C2=NC=NC(=C2)OC3=CC=CC4=C3N=C(S4)NC(C)=O)C(F)(F)F	659730-32-2	10 mM	430.4	S7115	TRPV	AMG 517 is a potent and selective transient receptor potential vanilloid-1 (TRPV1) antagonist with IC50 of <10 nM.
Rocilinostat (ACY-1215)	7-H8	0158616737	S-inhibitor	C1=CC=CC(=C1)N(C2=CC=CC=C2)C3=NC=C(C=N3)C(=O)NCCCCCCC(NO)=O	1316214-52-4	10 mM	433.5	S8001	HDAC	Rocilinostat (ACY-1215) is a selective HDAC6 inhibitor with IC50 of 5 nM.
GSK2636771	7-H9	0150551627	S-inhibitor	C1=C(C=C2C(=C1C(=O)O)N=C(N2CC3=CC=CC(=C3C)C(F)(F)F)C)N4CCOCC4	1372540-25-4	10 mM	433.42	S8002	PI3K	GSK2636771 is a potent, orally bioavailable, PI3Kβ-selective inhibitor.
ZM 39923 HCl	7-H10	0150551628	S-inhibitor	C(CCN(C(C)C)CC1C=CC=CC=1)(=O)C2(C=C3C=CC=CC(=CC=2)3).Cl	1021868-92-7	10 mM	367.91	S8004	JAK	ZM39923 is an JAK inhibitor for JAK1, JAK3, EFGR and TGM2 with IC50 of 4.4 μM, 7.1 μM, 5.6 μM and 10 nM, respectively.
SMI-4a	7-H11	0150551696	S-inhibitor	S1C(NC(C/1=C\C2C=C(C=CC=2)C(F)(F)F)=O)=O	438190-29-5	10 mM	273.23	S8005	Pim	SMI-4a is a potent inhibitor of Pim1 with IC50 of 17 nM.
BIX01294	8-A2	0158616748	S-inhibitor	N1(C(=NC(=C2C=C(C(=CC=12)OC)OC)NC3CCN(CC3)CC4C=CC=CC=4)N5CCN(CCC5)C).Cl.Cl.Cl	1392399-03-9	10 mM	600.02	S8006	Histone Methyltransferase	BIX01294 is an inhitor of G9a histone methyltransferase with IC50 of 2.7 μM.
VE-821	8-A3	0158616722	S-inhibitor	C1(C(=NC=C(N=1)C2C=CC(=CC=2)S(=O)(=O)C)N)C(=O)NC3C=CC=CC=3	1232410-49-9	10 mM	368.41	S8007	ATM/ATR	VE-821 is a potent and selective ATP competitive inhibitor of ATR with Ki and IC50 of 13 nM and 26 nM, respectively.
PRX-08066	8-A4	0150551621	S-inhibitor	C(/C=C\C(=O)O)(=O)O.C(C1C(=CC=C(C=1)CN2CCC(CC2)NC3C4=C(N=CN=3)SC(=C4)Cl)F)#N	866206-55-5	10 mM	517.96	S8010	5-HT Receptor	PRX-08066 is a selective 5-HT2B antagonist with IC50 of 3.4 nM.
Otenabant (CP-945598) HCl	8-A5	0150551672	S-inhibitor	N1(CCC(CC1)(C(=O)N)NCC)C2(=NC=NC3N(C(=NC2=3)C4C(=CC=CC=4)Cl)C5C=CC(=CC=5)Cl).Cl	686347-12-6	10 mM	546.88	S8012	Cannabinoid Receptor	CP-945598 HCl is a potent and selective cannabinoid type 1 receptor antagonist with Ki of 0.7 nM.
CEP-32496	8-A6	0150551677	S-inhibitor	N(C(=O)NC1=NOC(=C1)C(C(F)(F)F)(C)C)C2C=C(C=CC=2)OC3N=CN=C4C=C(C(=CC=34)OC)OC	1188910-76-0	10 mM	517.46	S8015	CSF-1R	CEP-32496 is a RAF inhibitor for BRAF(V600E), BRAF(WT), c-Raf, Abl-1 and CSF-1R with IC50 of 14 nM, 36 nM, 39 nM, 3 nM and 9 nM, respectively.
TAK-438	8-A7	0158616752	S-inhibitor	N(CC1=CN(C(=C1)C2C(=CC=CC=2)F)S(=O)(=O)C3C=NC=CC=3)C.C(/C=C/C(=O)O)(=O)O	1260141-27-2	10 mM	461.46	S8016	Potassium Channel	TAK-438 is a novel potassium-competitive acid blocker (P-CAB) type antisecretory agent that reversibly inhibits gastric H+, K+-ATPase with IC50 of 19 nM at pH 6.5.
AZD5363	8-A8	0150551703	S-inhibitor	N1(CCC(CC1)(C(=O)N[C@@H](CCO)C2C=CC(=CC=2)Cl)N)C3C4=C(N=CN=3)NC=C4	1143532-39-1	10 mM	428.92	S8019	Akt	AZD5363 is a potent Akt inhibitor for Akt1, Akt2 and Akt3 with IC50 of 3 nM, 8 nM and 8 nM, respectively.
GW0742	8-A9	0150551700	S-inhibitor	N1=C(SC(=C1C)CSC2C=C(C)C(=CC=2)OCC(=O)O)C3C=C(C(=CC=3)C(F)(F)F)F	317318-84-6	10 mM	471.49	S8020	PPAR	GW0742 is a potent and highly selective PPARβ/δ agonist, binding to hPPARδ with IC50 of 1 nM.
Vortioxetine (Lu AA21004) hydrobromide	8-A10	0150551694	S-inhibitor	C1(=CC=C(C(=C1)C)SC2=CC=CC=C2N3CCNCC3)C.Br	960203-27-4	10 mM	379.36	S8021	5-HT Receptor	Lu-AA21004 is an oral multimodal serotonergic agent, inhibits 5-HT(1A), 5-HT(1B), 5-HT(3A), 5-HT(7) and SERT with IC50 of 15 nM, 33 nM, 3.7 nM, 19 nM and 1.6 nM, respectively.
Empagliflozin (BI10773)	8-A11	0150551699	S-inhibitor	[C@H]1([C@H]([C@@H]([C@H]([C@@H](O1)C2=CC(=C(C=C2)Cl)CC3=CC=C(C=C3)O[C@H]4CCOC4)O)O)O)CO	864070-44-0	10 mM	450.91	S8022	SGLT	Empagliflozin (BI-10773) is a potent and selective SGLT2 inhibitor with IC50 of 3.1 nM.
GSK3787	8-B2	0150551698	S-inhibitor	C1=NC(=CC=C1C(F)(F)F)S(=O)(CCNC(C2=CC=C(C=C2)Cl)=O)=O	188591-46-0	10 mM	392.78	S8025	PPAR	GSK3787 is as a potent and selective antagonist of PPARδ with pIC50 of 6.6.
Tariquidar	8-B3	0158618957	S-inhibitor	C1=CC=C2C(=C1)C=C(C=N2)C(NC3=C(C=C(C(=C3)OC)OC)C(NC4=CC=C(C=C4)CCN5CC6=C(CC5)C=C(C(=C6)OC)OC)=O)=O	206873-63-4	10 mM	646.73	S8028	P-gp	Tariquidar (XR9576) is a potent and selective noncompetitive inhibitor of P-glycoprotein with Kd of 5.1 nM.
Plerixafor (AMD3100)	8-B4	0153713495	S-inhibitor	N1(CC2=CC=C(CN3CCCNCCNCCCNCC3)C=C2)CCCNCCNCCCNCC1	110078-46-1	10 mM	502.78	S8030	CXCR	Plerixafor is a chemokine receptor antagonist for CXCR4 and CXCL12-mediated chemotaxis with IC50 of 44 nM and 5.7 nM, respectively.
PRT062607 (P505-15, PRT2607, BIIB057) HCl	8-B5	0158618886	S-inhibitor	N1(=C(N=C(C(=C1)C(N)=O)NC2=CC(=CC=C2)N3N=CC=N3)N[C@@H]4CCCC[C@H]4N).Cl	1370261-97-4,1370261-96-3(free base)	10 mM	429.91	S8032	Syk
Apremilast (CC-10004)	8-B6	0158618887	S-inhibitor	C1=CC2=C(C(N(C2=O)[C@@H](C3=CC(=C(C=C3)OC)OCC)CS(=O)(C)=O)=O)C(=C1)NC(C)=O	608141-41-9	10 mM	460.5	S8034	PDE	Apremilast (CC-10004) is a potent PDE4 and TNF-α inhibitor with IC50 of 74 nM and 77 nM, respectively.
VU 0364439	8-B7	0150549697	S-inhibitor	C1=CC=CC(=N1)C(NC2=CC(=C(C=C2)S(=O)(=O)NC3=C(C=CC=C3)Cl)Cl)=O	1246086-78-1	10 mM	422.29	S8035	GluR
GDC-0349	8-B8	0158618926	S-inhibitor	N(C(=O)NC1C=CC(=CC=1)C2N=C3C(=C(N=2)N4[C@H](COCC4)C)CCN(C3)C5COC5)CC	1207360-89-1	10 mM	452.55	S8040	mTOR	GDC-0349, is a potent and selective ATP-competitive inhibitor of mTOR with Ki of 3.8 nM.
ABT-199 (GDC-0199 )	8-B9	0158618948	S-inhibitor	C1=C(C=CC(=C1)C2CC(CCC=2CN3CCN(CC3)C4=CC(=C(C=C4)C(=O)NS(C5=CC=C(C(=C5)[N+](=O)[O-])NCC6CCOCC6)(=O)=O)OC7=CN=C8C(=C7)C=CN8)(C)C)Cl	1257044-40-8	10 mM	868.44	S8048	Bcl-2	ABT-199 is a Bcl-2-selective inhibitor with Ki of < 0.010 nM.
Macitentan	8-B10	0158618909	S-inhibitor	C1(=CN=C(N=C1)OCCOC2=C(C(=NC=N2)NS(=O)(NCCC)=O)C3=CC=C(C=C3)Br)Br	441798-33-0	10 mM	588.27	S8051	Endothelin Receptor	Macitentana (Actelion-1, ACT-064992) is an orally active, non-peptide dual endothelin (ET)A/B receptor antagonist with IC50 of 0.5 nM/391 nM._x000D_
Malotilate	1-A2	0153499763	S-FDA	C(C(C(=O)OC(C)C)=C1SC=CS1)(=O)OC(C)C	59937-28-9	10 mM	200	S1137		Malotilate is a liver protein metabolism improved compound.
Entecavir hydrate	1-A3	0161154484	S-FDA	N1(=C(NC2=C(C1=O)N=CN2[C@H]3C[C@@H]([C@H](C3=C)CO)O)N).O	209216-23-9	10 mM	190	S1252		Entecavir hydrate belongs to the family of medicines called antivirals.
Nepafenac	1-A4	0161154526	S-FDA	C(CC1C(=C(C=CC=1)C(C2C=CC=CC=2)=O)N)(=O)N	78281-72-8	10 mM	200	S1255		Nepafenac is a non-steroidal anti-inflammatory drug (NSAID).
Pamidronate Disodium	1-A6	0161154650	S-FDA	C(O)(P([O-])(O)=O)(CCN)P([O-])(O)=O.[Na+].[Na+]	57248-88-1	10 mM	10	S1311		Pamidronate disodium is a nitrogen containing bisphosphonate, used to prevent osteoporosis.
Biapenem	1-A7	0161154718	S-FDA	C1([C@@]([C@@]2(N1C(=C([C@@H]2C)SC3CN4[N+](C3)=CC=N4)C(=O)[O-])[H])(C(C)O)[H])=O	120410-24-4	10 mM	10	S1370		Biapenem is a carbapenem antibiotic.
Cefoselis sulfate	1-A8	0161154697	S-FDA	C1(C(=C(N2[C@](S1)([C@H](C2=O)NC(=O)/C(=N/OC)C3N=C(SC=3)N)[H])C(=O)O)CN4C=CC(N4CCO)=N).S(O)(O)(=O)=O	122841-12-7	10 mM	10	S1371		Cefoselis sulfate is an antibiotic.
Doripenem Hydrate	1-A9	0161154643	S-FDA	C1([C@]([C@]2(N1C(=C([C@H]2C)S[C@@H]3CN[C@@H](C3)CNS(N)(=O)=O)C(=O)O)[H])([C@H](C)O)[H])=O.O	364622-82-2	10 mM	80	S1374		Doripenem (doripenem monohydrate) is an ultra-broad spectrum injectable antibiotic.
Bimatoprost	1-A10	0161153519	S-FDA	C1=CC=C(C=C1)CCC(O)/C=C/[C@@H]2[C@H]([C@H](C[C@H]2O)O)C/C=C\CCCC(=O)NCC	155206-00-1	10 mM	80	S1407		Bimatoprost is a prostaglandin analog used topically (as eye drops) to control the progression of glaucoma and in the management of ocular hypertension.
Ziprasidone hydrochloride	1-A11	0161154338	S-FDA	C1(=CC=CC2=C1C(=NS2)N3CCN(CC3)CCC4C(=CC5=C(C=4)CC(N5)=O)Cl).Cl	122883-93-6	10 mM	200	S1444		Ziprasidone was the fifth atypical antipsychotic.
Marbofloxacin	1-B2	0161154360	S-FDA	C1(=C(C2=C3C(=C1)C(C(=CN3N(CO2)C)C(O)=O)=O)N4CCN(CC4)C)F	115550-35-1	10 mM	10	S1464		Marbofloxacin is a potent antibiotic inhibiting bacterial DNA replication.
Doxercalciferol (Hectorol)	1-B3	0161154365	S-FDA	C1[C@@H](C(/C(C[C@@H]1O)=C/C=C2\CCC[C@]3([C@]2(CC[C@]3([C@@H](/C=C/[C@H](C(C)C)C)C)[H])[H])C)=C)O	54573-75-0	10 mM	200	S1467		Doxercalciferol (Hectorol) is a synthetic analog of vitamin D.
Iloperidone (Fanapt)	1-B4	0161154431	S-FDA	C1(=C(C=CC(=C1)C(C)=O)OCCCN2CCC(CC2)C3=NOC4=C3C=CC(=C4)F)OC	133454-47-4	10 mM	60	S1483		Iloperidone (Fanapt, Fanapta, Zomaril) is an atypical antipsychotic for the treatment of schizophrenia.
Cephalexin (Cefalexin)	1-B5	0161154379	S-FDA	C1=CC=C(C=C1)[C@H](C(N[C@@H]2C(N3[C@]2(SCC(=C3C(=O)O)C)[H])=O)=O)N	15686-71-2	10 mM	10	S1502		Cefalexin is a cephalosporin antibiotic.
Cyclosporine (Neoral)	1-B6	0161154917	S-FDA	C1(N(C)C(C(NC(C(NC(C(CC(C)C)N(C(C(NC(C(CC(C)C)N(C)C(=O)CN(C)C(C(CC)NC(C(N(C(C(N(C(=O)C(N(C)C1=O)CC(C)C)C)C(C)C)=O)C)[C@@H]([C@@H](C/C=C/C)C)O)=O)=O)=O)C(C)C)=O)C)=O)C)=O)C)=O)CC(C)C	79217-60-0	10 mM	120	S1514		Cyclosporine (Neoral) is an immunosuppressant drug.
Cidofovir (Vistide)	1-B7	0161154407	S-FDA	C1(C=CN(C(N=1)=O)C[C@@H](CO)OCP(O)(O)=O)N	113852-37-2	10 mM	10	S1516		Cidofovir(Vistide) is an injectable antiviral medication for the treatment of cytomegalovirus (CMV) retinitis. (IC50= 0.94 μM).
Tazarotene (Avage)	1-B8	0161154427	S-FDA	C1CC(C2=C(S1)C=CC(=C2)C#CC3=NC=C(C=C3)C(=O)OCC)(C)C	118292-40-3	10 mM	20	S1569		Tazarotene is a prescription topical retinoid sold as a cream or gel.
Prilocaine	1-B9	0161154841	S-FDA	C1=CC=CC(=C1C)NC(C(NCCC)C)=O	721-50-6	10 mM	190	S1619		Prilocaine is a local anesthetic of the amino amide type.
Darunavir Ethanolate (Prezista)	1-B10	0161154864	S-FDA	[C@@]12([C@]([C@@](CO1)([H])OC(N[C@](CC3=CC=CC=C3)([H])[C@](CN(CC(C)C)S(C4=CC=C(C=C4)N)(=O)=O)([H])O)=O)(CCO2)[H])[H].CCO	635728-49-3	10 mM	200	S1620	HIV Protease	Darunavir Ethanolate (Prezista) is an HIV protease inhibitor.
Prednisone (Adasone)	1-B11	0161154840	S-FDA	C1C(C=C2[C@](C=1)([C@]3([C@@](CC2)([C@]4([C@](CC3=O)([C@@](CC4)(C(CO)=O)O)C)[H])[H])[H])C)=O	53-03-2	10 mM	200	S1622		Prednisone (Adasone) is a synthetic corticosteroid drug that is particularly effective as an immunosuppressant drug.
Telbivudine (Sebivo, Tyzeka)	1-C2	0161154842	S-FDA	N1C(C(=CN(C1=O)[C@@H]2C[C@H]([C@@H](O2)CO)O)C)=O	3424-98-4	10 mM	190	S1651		Telbivudine (Tyzeka, Sebivo) is an antiviral drug used in the treatment of hepatitis B infection.
Flurbiprofen (Ansaid)	1-C3	0158618668	S-FDA	C1=C(C(=CC(=C1)[C@](C(O)=O)(C)[H])F)C2=CC=CC=C2	51543-39-6	10 mM	200	S1679		Flurbiprofen is a member of the phenylalkanoic acid derivative family of non-steroidal anti-inflammatory drugs (NSAIDs).
Betapar (Meprednisone)	1-C4	0158618670	S-FDA	C1C(C=C2[C@](C=1)([C@]3([C@@](CC2)([C@]4([C@](CC3=O)([C@]([C@H](C4)C)(O)C(CO)=O)C)[H])[H])[H])C)=O	1247-42-3	10 mM	200	S1689		Betapar (Meprednisone) is a glucocorticoid and a methylated derivative of prednisone.
Deferasirox (Exjade)	1-C5	0158618611	S-FDA	C1=CC(=CC=C1C(O)=O)N2C(=NC(=N2)C3=CC=CC=C3O)C4=CC=CC=C4O	201530-41-8	10 mM	200	S1712		Deferasirox(Exjade) is a rationally-designed oral iron chelator.
Glyburide (Diabeta)	1-C6	0150549863	S-FDA	C1CCCC(C1)NC(NS(C2=CC=C(C=C2)CCNC(C3=C(C=CC(=C3)Cl)OC)=O)(=O)=O)=O	10238-21-8	10 mM	200	S1716		Glyburide (Diabeta) is an anti-diabetic drug in a class of medications known as sulfonylureas, closely related to sulfa drugs.
Levodopa (Sinemet)	1-C7	0158618656	S-FDA	C1=C(C(=CC(=C1)C[C@H](N)C(=O)O)O)O	59-92-7	10 mM	10	S1726		Levodopa (Sinemet) is an amino acid precursor of dopamine with antiparkinsonian properties.
Gadodiamide (Omniscan)	1-C8	0150557536	S-FDA	C(=O)(CN(CCN(CC(=O)[O-])CCN(CC([O-])=O)CC(NC)=O)CC(=O)[O-])NC.[Gd+3].O	122795-43-1	10 mM	10	S1751		Gadodiamide (Omniscan) is a gadolinium-based contrast agent used in MR imaging procedures to assist in the visualization of blood vessels.
Cefditoren pivoxil	1-C9	0158618660	S-FDA	N12[C@](SCC(=C1C(=O)OCOC(C(C)(C)C)=O)\C=C/C3SC=NC=3C)([C@H](C2=O)NC(=O)/C(=N\OC)C4=CSC(=N4)N)[H]	117467-28-4	10 mM	190	S1768	5-alpha Reductase	Cefditoren pivoxil is used to treat uncomplicated skin and skin structure infections, etc.
Oxytetracycline (Terramycin)	1-C10	0158618675	S-FDA	C1(=C([C@H]([C@]2([C@@](C1=O)(C(C3[C@]([C@@H]2O)([C@@](C4=C(C=3O)C(=CC=C4)O)(O)C)[H])=O)O)[H])N(C)C)O)C(N)=O	79-57-2	10 mM	190	S1773		Oxytetracycline (Terramycin) was the second of the broad-spectrum tetracycline group of antibiotics to be discovered.
Acyclovir (Aciclovir)	1-C11	0150549994	S-FDA	OCCOCN1C2=C(N=C1)C(NC(=N2)N)=O	59277-89-3	10 mM	190	S1807	Others	Acyclovir is a synthetic nucleoside analogue active against herpesviruses
Fenoprofen calcium	1-D2	0150550019	S-FDA	O(C1=CC=CC(=C1)C(C)C(O[Ca]OC(C(C2C=CC=C(OC3=CC=CC=C3)C=2)C)=O)=O)C4=CC=CC=C4	34597-40-5	10 mM	200	S1823		Fenoprofen calcium is a nonsteroidal, anti-inflammatory antiarthritic agent.
Diltiazem HCl (Tiazac)	1-D3	0150550004	S-FDA	C12(N(C([C@@H]([C@@H](SC=1C=CC=C2)C3=CC=C(C=C3)OC)OC(C)=O)=O)CCN(C)C).Cl	33286-22-5	10 mM	190	S1865		Diltiazem HCl (Tiazac) is a benzothiazepine derivative with vasodilating action due to its antagonism of the actions of the calcium ion in membrane functions.
Diphenhydramine HCl (Benadryl)	1-D4	0150550010	S-FDA	C1(=CC(=CC=C1)C(C2=CC=CC=C2)OCCN(C)C).Cl	147-24-0	10 mM	190	S1866		Diphenhydramine hydrochloride (Benadryl), a histamine H1 antagonist used as an antiemetic, antitussive, for dermatoses and pruritus, for hypersensitivity reactions, as a hypnotic, an antiparkinson, and as an ingredient in common cold preparations.
Valaciclovir HCl	1-D6	0150549984	S-FDA	N1(C(=O)C2=C(N=C1N)N(C=N2)COCCOC([C@H](C(C)C)N)=O).Cl	124832-27-5	10 mM	30	S1876		Valaciclovir hydrochloride is an antiviral drug used in the management of herpes simplex, herpes zoster, and herpes B.
Potassium iodide	1-D7	0150550051	S-FDA	[K+].[I-]	7681-11-0	10 mM	190	S1897		Potassium iodide is used to treat overactive thyroid and to protect the thyroid gland from the effects of radiation from inhaled or swallowed radioactive iodine.
Talc	1-D8	0150550065	S-FDA	O=[Mg].O=[Mg].O=[Mg].[Si](=O)=O.[Si](=O)=O.[Si](=O)=O.[Si](=O)=O.O	14807-96-6	10 mM	10	S1900		Talc is a mineral composed of hydrated magnesium silicate with the chemical formula H2Mg3(SiO3)4 or Mg3Si4O10(OH)2.
Phenindione (Rectadione)	1-D9	0150550052	S-FDA	C1=CC=C2C(=C1)C(C(C2=O)C3=CC=CC=C3)=O	83-12-5	10 mM	190	S1921		Phenindione is an anticoagulant which functions as a Vitamin K antagonist.
Alibendol	1-D10	0150550006	S-FDA	C1=C(C(=C(C=C1CC=C)C(=O)NCCO)O)OC	26750-81-2	10 mM	190	S1928		Alibendol is an antispasmodic,chleretic, and cholekinetic.
Levamisole Hydrochloride (Ergamisol)	1-D11	0150550007	S-FDA	[C@]1(CN2C(=N1)SCC2)(C3=CC=CC=C3)[H].Cl	16595-80-5	10 mM	10	S1939	Angiogenesis	Levamisole Hydrochloride (Ergamisol)is an antihelminthic drug that has been tried experimentally in rheumatic disorders where it apparently restores the immune response by increasing macrophage chemotaxis and T-lymphocyte function.
ATP (Adenosine-Triphosphate)	1-E2	0161154492	S-FDA	O1([C@H]([C@@H]([C@@H]([C@@H]1COP(OP(OP(O)([O-])=O)(=O)[O-])(=O)O)O)O)N2C=NC3=C2N=CN=C3N).[Na+].[Na+]	987-65-5	10 mM	10	S1985		ATP is a disodium salt form of adenosine-triphosphate which is a multifunctional nucleoside triphosphate.
Sodium butyrate	1-E3	0161154467	S-FDA	CCCC(O[Na])=O	156-54-7	10 mM	10	S1999		Sodium butyrate is a compound with formula Na (C3H7COO)
Mirtazapine (Remeron, Avanza)	1-E4	0161154888	S-FDA	C1C2=C(N3C(C4=C1C=CC=C4)CN(CC3)C)N=CC=C2	85650-52-8	10 mM	190	S2016		Mirtazapine (Remeron, Avanza) is a potent tetracyclic antidepressant.
Fenticonazole nitrate	1-E5	0161154447	S-FDA	C(OCC1=CC=C(C=C1)SC2=CC=CC=C2)(C3=CC=C(C=C3Cl)Cl)CN4(C=CN=C4).[N+]([O-])(=O)O	73151-29-8	10 mM	200	S2031		Fenticonazole nitrate is an azole antifungal agent.
Tiopronin (Thiola)	1-E6	0161154732	S-FDA	C(CNC(C(C)S)=O)(=O)O	1953-02-2	10 mM	190	S2062		Tiopronin is a US Food and Drug Administration (FDA)-approved drug for the treatment of cystinuria by controlling the rate of cystine precipitation and excretion.
Balofloxacin	1-E7	0161154828	S-FDA	N1(C2=C(C3=C(C=C2F)C(C(=CN3C4CC4)C(=O)O)=O)OC)CC(CCC1)NC	127294-70-6	10 mM	10	S2064		Balofloxacin is quinolone antibiotic, inhibiting the synthesis of bacterial DNA by interference with the enqyme DNA gyrase.
Dronedarone HCl (Multaq)	1-E8	0150549826	S-FDA	C1(=CC=C2C(=C1)C(=C(O2)CCCC)C(=O)C3=CC=C(C=C3)OCCCN(CCCC)CCCC)NS(=O)(C)=O.Cl	141625-93-6	10 mM	130	S2114		Dronedarone is a therapy for the treatment of patients with paroxysmal and persistent atrial fibrillation or atrial flutter.
Conivaptan HCl (Vaprisol)	1-E9	0150549850	S-FDA	C(NC1=CC=C(C=C1)C(N2C3=C(C4=C(CC2)N=C(N4)C)C=CC=C3)=O)(C5=C(C=CC=C5)C6=CC=CC=C6)=O.Cl	168626-94-6	10 mM	190	S2116		Conivaptan is a non-peptide inhibitor of antidiuretic hormone (vasopressin receptor antagonist).
Arbidol HCl	1-E10	0150549829	S-FDA	C1(=C(C=C2C(=C1CN(C)C)C(=C(N2C)CSC3=CC=CC=C3)C(OCC)=O)Br)O.Cl	131707-23-8	10 mM	200	S2120		Arbidol is an antiviral treatment for influenza infection.
Dextrose (D-glucose)	1-E11	0150549807	S-FDA	OC[C@H]([C@H]([C@@H]([C@H](C(=O)[H])O)O)O)O	50-99-7	10 mM	190	S2123		Dextrose (D-glucose), a simple sugar (monosaccharide), is an important carbohydrate in biology.
Xylose	1-F2	0150549802	S-FDA	OC[C@H]([C@@H]([C@H](C=O)O)O)O	25990-60-7	10 mM	190	S2124		Xylose is a sugar first isolated from wood.
Fudosteine	1-F3	0150549851	S-FDA	[C@@H](C(=O)O)(CSCCCO)N	13189-98-5	10 mM	10	S2129		Fudosteine is a novel mucoactive agent and a MUC5AC mucin hypersecretion inhibitor.
Sitafloxacin hydrate	1-F4	0150549809	S-FDA	N1(C=C(C(C2C=C(C(=C(C1=2)Cl)N3CC4(CC4)[C@H](C3)N)F)=O)C(=O)O)[C@H]5([C@H](C5)F).[R]	163253-35-8	10 mM	10	S2152		Sitafloxacin hydrate is a new-generation, broad-spectrum oral fluoroquinolone antibiotic.
Rosuvastatin calcium (Crestor)	1-F6	0150549810	S-FDA	N1(=C(N=C(C(=C1C(C)C)/C=C/[C@@H](O)C[C@H](CC([O-])=O)O)C2=CC=C(C=C2)F)N(S(C)(=O)=O)C).N3(=C(N=C(C(=C3C(C)C)/C=C/[C@@H](O)C[C@H](CC([O-])=O)O)C4=CC=C(C=C4)F)N(S(C)(=O)=O)C).[Ca+2]	147098-20-2	10 mM	190	S2169	RAAS	Rosuvastatin (Crestor) is a member of statins and used to treat high cholesterol and related conditions, and to prevent cardiovascular disease.
BIBR 953 (Dabigatran etexilate, Pradaxa)	1-F7	0150549873	S-FDA	C1(=CC=C2C(=C1)N=C(N2C)CNC3=CC=C(C=C3)C(=N)N)C(N(CCC(O)=O)C4=NC=CC=C4)=O	211914-51-1	10 mM	10	S2196	Thrombin	BIBR 953(Dabigatran) is a reversible, competitive, direct thrombin inhibitor.
Ammonium Glycyrrhizinate (AMGZ)	1-F9	0150549813	S-FDA	[C@@]1(CC[C@]2([C@@](C1)(C3[C@@](CC2)([C@]4([C@](C(C=3)=O)([C@]5([C@@](CC4)(C([C@H](CC5)O[C@]6(O[C@@H]([C@H]([C@@H]([C@@H]6O[C@]7([C@@H]([C@H]([C@@H]([C@H](O7)C(=O)O)O)O)O)[H])O)O)C(O)=O)[H])(C)C)[H])C)[H])C)C)[H])C)(C)C(O)=O.N	1407-03-0	10 mM	200	S2376		Mono-ammonium glycyrrhizinate(AMGZ) is a unique product derived from Licorice root and has an extremely sweet taste.
D-Mannitol (Osmitrol)	1-F10	0150549819	S-FDA	OC[C@H]([C@H]([C@@H]([C@@H](CO)O)O)O)O	69-65-8	10 mM	190	S2381		D-Mannitol(Osmitrol) is an osmotic diuretic agent and a weak renal vasodilator.
Sorbitol (Glucitol)	1-F11	0150549849	S-FDA	OC[C@H]([C@H]([C@@H]([C@H](CO)O)O)O)O	50-70-4	10 mM	190	S2393		Sorbitol(Glucitol) is a sugar alcohol and a sugar substitute.
Cephalomannine	1-G2	0150549831	S-FDA	C1=CC=CC(=C1)[C@@H]([C@H](C(O[C@H]2C[C@@]3(C(C(=C2C)[C@@H](C([C@]4([C@@]([C@]5([C@@H](C[C@H]4O)OC5)OC(=O)C)([C@@H]3OC(C6=CC=CC=C6)=O)[H])C)=O)OC(=O)C)(C)C)O)=O)O)NC(/C(=C/C)C)=O	71610-00-9	10 mM	130	S2408		Cephalomannine is an active anti-cancer agent obtained from Taxus yunnanensis and has an antineoplastic effect on tumors found in mice.
Paeoniflorin	1-G3	0150549796	S-FDA	[C@H]1([C@H]([C@@H]([C@H]([C@@H](O1)O[C@]23[C@@]4([C@@]5(O[C@]2(C)C[C@]([C@@]4(C3)[H])(O5)O)[H])COC(C6=CC=CC=C6)=O)O)O)O)CO	23180-57-6	10 mM	190	S2410		Paeoniflorin is a herbal constituent extracted from the root of Paeonia albiflora Pall.
Quinine hydrochloride dihydrate	1-G4	0150549885	S-FDA	C1(=CC2=C(C=C1OC)C(=CC=N2)[C@@H]([C@]3(N4CC[C@@](C3)([C@H](C4)C=C)[H])[H])O).Cl.O.O	6119-47-7	10 mM	190	S2502		Quinine hydrochloride dihydrate is a natural white crystalline alkaloid having antipyretic (fever-reducing), antimalarial, analgesic (painkilling), anti-inflammatory properties and a bitter taste.
Ciclopirox (Penlac)	1-G5	0161154400	S-FDA	C1CCCC(C1)C2N(C(C=C(C=2)C)=O)O	29342-05-0	10 mM	200	S2528		Ciclopirox (Penlac) is a synthetic antifungal agent.
Cefprozil hydrate (Cefzil)	1-G6	0161154373	S-FDA	[C@@H]12(N(C(=C(CS1)/C=C/C)C(=O)O)C([C@H]2NC([C@@H](C3=CC=C(C=C3)O)N)=O)=O).O	121123-17-9	10 mM	10	S2544		Cefprozil hydrate (Cefzil) is a second-generation cephalosporin type antibiotic.
5-Aminolevulinic acid hydrochloride	1-G7	0161154345	S-FDA	NCC(CCC(O)=O)=O.Cl	5451-09-2	10 mM	200	S2553		5-Aminolevulinic acid is an intermediate in heme biosynthesis in the body and the universal precursor of tetrapyrroles.
Cortisone acetate (Cortone)	1-G8	0161154371	S-FDA	C1C(C=C2[C@](C1)([C@]3([C@@](CC2)([C@]4([C@](CC3=O)([C@@](CC4)(C(COC(C)=O)=O)O)C)[H])[H])[H])C)=O	50-04-4	10 mM	10	S2559		Cortisone acetate (Cortone) is an acetate salt form of cortisone that is a steroid hormone and a glucocorticoid.
Cloxacillin sodium (Cloxacap)	1-G9	0161154370	S-FDA	[C@H]1(C(N2[C@]1(SC([C@@H]2C(=O)[O-])(C)C)[H])=O)NC(=O)C3(=C(ON=C3C4=CC=CC=C4Cl)C).[Na+].O	7081-44-9	10 mM	110	S2564		Cloxacillin sodium (Cloxacap) is a sodium salt of cloxacillin (Cloxapen, Cloxacap，Orbenin) that is a penicillinase-resistant, acid resistant, semi-synthetic penicillin.
Amoxicillin sodium (Amox)	1-G10	0161154390	S-FDA	C1(=CC=C(C=C1)[C@H](C(N[C@H]2[C@@]3(N(C2=O)[C@@H](C(S3)(C)C)C(=O)[O-])[H])=O)N)O.[Na+]	34642-77-8	10 mM	200	S2565		Amoxicillin (Amox) is a moderate- spectrum, bacteriolytic, β-lactam antibiotic.
Vancomycin HCl (Vancocin)	1-G11	0161154978	S-FDA	[C@H]1([C@@H](O[C@H](C[C@]1(N)C)O[C@@H]2[C@H]([C@@H]([C@H](O[C@@H]2OC3=C4C=C5C=C3OC6=CC=C(C=C6Cl)[C@H]([C@H](C(=O)N[C@](C(N[C@]5(C(=O)N[C@]7(C(N[C@@](C(N[C@@H](C8=C(C9C=C7C=CC=9O)C(=CC(=C8)O)O)C(O)=O)=O)([C@@H](C%10=CC=C(C(=C%10)Cl)O4)O)[H])=O)[H])[H])=O)(CC(N)=O)[H])NC([C@@](CC(C)C)(NC)[H])=O)O)CO)O)O)C)O.Cl	1404-93-9	10 mM	10	S2575		Vancomycin hydrochloride (Vancocin) is a hydrochloride of vancomycin that is a narrow-spectrum glycopeptide antibacterial agent.
Calcium levofolinate (Calcium Folinate)	1-H2	0161154934	S-FDA	C1(=C(C=CC(=C1)NC[C@@H]2N(C3=C(NC2)NC(=NC3=O)N)C([H])=O)C(=O)N[C@@H](CCC([O-])=O)C(=O)[O-]).[Ca+2]	80433-71-2	10 mM	10	S2588		Calcium levofolinate (Calcium Folinate) is a calcium salt of folinic acid that is an adjuvant used in cancer chemotherapy.
Pramiracetam	1-H3	0161154912	S-FDA	C(C(=O)NCCN(C(C)C)C(C)C)N1C(CCC1)=O	68497-62-1	10 mM	200	S2594		Pramiracetam is a more potent nootropic drug derived from piracetam.
Oseltamivir phosphate (Tamiflu)	1-H4	0161154959	S-FDA	[C@@H]1([C@@H]([C@H](CC(=C1)C(OCC)=O)N)NC(C)=O)OC(CC)CC.P(=O)(=O)OO.[HH]	204255-11-8	10 mM	10	S2597		Oseltamivir phosphate (Tamiflu) is a competitive neuraminidase inhibitor.
Peramivir Trihydrate	1-H5	0161154940	S-FDA	C(N)(=N)N[C@]1([C@]([C@]([C@](C1)(C(=O)O)[H])([H])O)([H])[C@](C(CC)CC)(NC(C)=O)[H])[H].O.O.O	1041434-82-5	10 mM	10	S2716		Peramivir Trihydrate is a trihydrate of the anti-infection agent peramivir (RWJ-270201,BCX-1812) which is a transition-state analogue and a potent, specific influenza viral neuraminidase inhibitor with an IC50 of median 0.09 nM.
Hygromycin B	1-H6	0161154981	S-FDA	C1[C@H]([C@@H]([C@]([C@@H]([C@@H]1NC)O)(O[C@@H]2O[C@@H]([C@@H]([C@]3([C@]2(OC4(O3)O[C@@]([C@@H]([C@@H]([C@@H]4O)O)O)([C@H](CO)N)[H])[H])[H])O)CO)[H])O)N	31282-04-9	10 mM	10	S2908		Hygromycin B, a selective antibiotic that is effective on most bacteria, fungi and higher eukaryotes, inhibits protein synthesis by interfering with translocation and causing mistranslation at the 70S ribosome.
Carbazochrome sodium sulfonate	1-H7	0161154939	S-FDA	N1(C(CC2=C/C(C(C=C12)=O)=N/NC(=O)N)S(=O)(=O)O[Na])C	51460-26-5	10 mM	190	S3000		Carbazochrome is an antihemorrhagic for use in the treatment of hemorrhoids.
Cabazitaxel (Jevtana)	1-H8	0130353434	S-FDA	[C@@]12([C@@]([C@]3([C@@](C[C@H]1OC)(OC3)[H])OC(=O)C)([C@H]([C@]4(C[C@@H](C(=C([C@H](C2=O)OC)C4(C)C)C)OC([C@@H]([C@@H](NC(OC(C)(C)C)=O)C5=CC=CC=C5)O)=O)O)OC(=O)C6=CC=CC=C6)[H])C	183133-96-2	10 mM	110	S3022		Cabazitaxel (Jevtana, XRP6258) is a semi-synthetic derivative of a natural taxoid.
Droxidopa (L-DOPS)	1-H10	0149688823	S-FDA	C1(=C(C=CC(=C1)[C@@H](O)[C@H](N)C(=O)O)O)O	23651-95-8	10 mM	10	S3041		Droxidopa (L-DOPS) is a psychoactive drug and acts as a prodrug to the neurotransmitters norepinephrine (noradrenaline) and epinephrine (adrenaline).
Cinepazide maleate	1-H11	0149688848	S-FDA	N1(CCN(CC1)C(/C=C/C2C=C(C(=C(C=2)OC)OC)OC)=O)CC(=O)N3(CCCC3).C(/C=C\C(O)=O)(O)=O	26328-04-1	10 mM	200	S3045		Cinepazide maleate is a maleate salt form of cinepazide which is a vasodilator.
Besifloxacin HCl (Besivance)	2-A2	0130353459	S-FDA	C12(=C(C(C(=CN1C3CC3)C(=O)O)=O)C=C(C(=C2Cl)N4CCCC[C@](C4)(N)[H])F).Cl	405165-61-9	10 mM	10	S3055		Besifloxacin HCl is a fourth-generation fluoroquinolone antibiotic.
Diclofenac Diethylamine	2-A3	0153498340	S-FDA	C1(=CC=C(C(=C1Cl)NC2=CC=CC=C2CC(O)=O)Cl).N(CC)CC	78213-16-8	10 mM	200	S3063		Diclofenac diethylamine is a nonsteroidal anti-inflammatory drug taken to reduce inflammation and as an analgesic reducing pain in certain conditions.
Butenafine HCl	2-A4	0130355382	S-FDA	C1(C=CC=C2C=CC=CC=12)CN(C)CC3(C=CC(=CC=3)C(C)(C)C).Cl	101827-46-7	10 mM	190	S3154		Butenafine HCl is a synthetic benzylamine antifungal, works by inhibiting the synthesis of sterols by inhibiting squalene epoxidase.
Sodium Picosulfate	2-A5	0130353474	S-FDA	C(C1=CC=C(C=C1)OS(=O)(=O)[O-])(C2C=CC(=CC=2)OS(=O)(=O)[O-])C3(=CC=CC=N3).[Na+].[Na+]	10040-45-6	10 mM	190	S4020		Sodium Picosulfate inhibits absorption of water and electrolytes, and increases their secretion.
Guanidine HCl	2-A7	0149688810	S-FDA	NC(N)=N.Cl	50-01-1	10 mM	190	S4070
Pimecrolimus	2-A8	0161147401	S-FDA	[C@H]1(C[C@@H](CC[C@H]1Cl)/C=C(/[C@@H]2[C@@H]([C@@H](O)CC(=O)[C@H](CC)/C=C(/C[C@@H](C[C@@H]([C@H]3[C@H](C[C@H]([C@](C(C(N4[C@](C(O2)=O)(CCCC4)[H])=O)=O)(O3)O)C)OC)OC)C)C)C)C)OC	137071-32-0	10 mM	190	S5004		Inhibitor of inflammatory cytokine secretion
Retapamulin	2-A9	EMPTY	S-FDA	[C@]12(CC[C@@](N1C)(C[C@H](C2)SCC(O[C@@H]3C[C@]([C@H]([C@@H]([C@]45[C@]([C@@]3(C)[C@H](CC4)C)(C(CC5)=O)[H])C)O)(C)C=C)=O)[H])[H]	224452-66-8	10 mM	200	S4056		Retapamulin is a topical antibiotic, which binds to both E. coli and S. aureus ribosomes with similar potencies with Kd of 3 nM.
